# Supplementary material for: Self-Assembled Capsules of Unprecedented Shapes
Source: PubMed Central journal article supplement (PMC3272346; doi:10.1002/anie.201102548), 2011-08-26
Supplement: anie0050-12003-SD1.pdf [file anie0050-12003-SD1.pdf]

Supporting Information

© Wiley-VCH 2011

69451 Weinheim, Germany

**Self-Assembled Capsules of Unprecedented Shapes\*\***

*Konrad Tiefenbacher, Dariush Ajami, and Julius Rebek Jr.\**

anie\_201102548\_sm\_miscellaneous\_information.pdf

## Table of Contents

|                                                                                                              |      |
|--------------------------------------------------------------------------------------------------------------|------|
| Materials and General Methods .....                                                                          | S 2  |
| Synthesis of propanediurea 3 .....                                                                           | S 2  |
| Synthesis of nonadeca-8,11-diyn-10-one (5).....                                                              | S 4  |
| General procedure for the encapsulation studies:.....                                                        | S 6  |
| Determination of guest length.....                                                                           | S 6  |
| Determination of packing coefficients (PC) .....                                                             | S 7  |
| <sup>1</sup> H-NMR spectra of encapsulated <i>n</i> -tetradecane in host I/II.....                           | S 9  |
| <sup>1</sup> H-NMR spectra of encapsulated <i>n</i> -pentadecane in host I/II .....                          | S 10 |
| ROESY spectrum of encapsulated <i>n</i> -pentadecane in host I/II at 280 K. ....                             | S 13 |
| NMR spectra of encapsulated <i>n</i> -heptadecane in host II.....                                            | S 14 |
| Encapsulation of 2-heptadecanol in host II .....                                                             | S 17 |
| NMR spectra of encapsulated <i>n</i> -octadecane in host II/III .....                                        | S 20 |
| NMR spectra of encapsulated <i>n</i> -nonadecane in host III.....                                            | S 21 |
| Shape selective encapsulation studies .....                                                                  | S 27 |
| NMR spectra of encapsulated <i>n</i> -docosane ( <i>n</i> -C <sub>22</sub> H <sub>46</sub> ) in host IV..... | S 29 |
| References .....                                                                                             | S 32 |
| raw data (B3LYP/6-31G*) for the calculated NMR spectrum .....                                                | S 33 |

## Materials and General Methods

All reactions were carried out under an atmosphere of argon unless otherwise indicated. Analytical thin-layer chromatography (TLC) was performed on Silicycle 60 F254 glass-baked plates.  $^1\text{H}$  NMR and  $^{13}\text{C}$  NMR spectra were recorded at 600 MHz and 150 MHz respectively, using a Bruker DRX-600 spectrometer equipped with a 5 mm QNP probe. Chemical shifts of  $^1\text{H}$  NMR and  $^{13}\text{C}$  NMR are given in ppm by using  $\text{CHCl}_3$  or DMSO as references (7.26 ppm, 2.50 ppm respectively for  $^1\text{H}$  spectrum, and 77.16 ppm, 39.52 ppm respectively for  $^{13}\text{C}$  spectrum). Coupling constants (J) are reported in Hertz (Hz). Standard abbreviations indicating multiplicity were used as follows: s (singlet), br (broad), d (doublet), t (triplet), q (quartet), m (multiplet). MALDI-TOF spectra and high-resolution mass spectra (HRMS) were recorded on an Applied Biosystems Voyager STR (2) apparatus and an Agilent ESI-TOF mass spectrometer respectively. Anhydrous  $\text{CH}_2\text{Cl}_2$ ,  $\text{NEt}_3$  and  $\text{Et}_2\text{O}$  were taken from a solvent drying system (SG Water USA).

All deuterated solvents were purchased from Cambridge Isotope Laboratories, Inc. All *n*-alkanes, *n*-butyl lithium (1.6 M in hexane), urea and ethyl formate were purchased from Sigma-Aldrich. 2,2-di-*n*-octyl-1,3-propanediol and *p*-pentaphenyl were purchased from TCI America. Oxalyl chloride was purchased from Fluka. 1-nonyne was purchased from Alfa Aesar. Pyridinium chlorochromate and DMSO were purchased from Acros. Acetic acid, sulfuric acid, celite and molecular sieves 4Å powder were purchased from Fisher Chemicals. All chemicals were used as received.

Cavitand **1** was prepared according to literature procedures.<sup>1</sup>

## Synthesis of propanediurea **3**

The synthesis of propanediurea<sup>2,3</sup> **3** is shown in Scheme SI 1: Swern oxidation of the commercially available diol **6** delivered dialdehyde **7**, which on treatment with urea under acidic conditions yielded **3** in 81% over two steps.

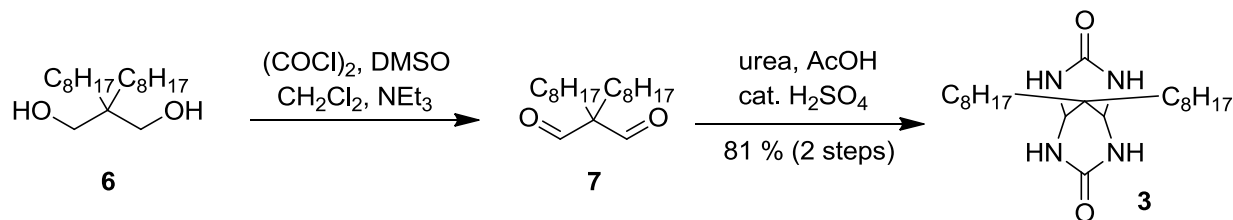

**Scheme SI 1**

### 2,2-di-n-octylmalonaldehyde (7)

To a solution of oxalyl chloride (0.31 mL, 3.66 mmol) in  $\text{CH}_2\text{Cl}_2$  (8.8 mL) was added DMSO (0.52 mL, 7.3 mmol) dissolved in  $\text{CH}_2\text{Cl}_2$  (1 mL) dropwise at  $-78^\circ\text{C}$ . After stirring at this temperature for 40 min, a solution of commercially available 2,2-di-n-octyl-1,3-propanediol (**6**) (500 mg, 1.66 mmol) in  $\text{CH}_2\text{Cl}_2$  (2 mL) was introduced to the suspension. The mixture was kept at  $-78^\circ\text{C}$  for 90 min.  $\text{NEt}_3$  (1.6 mL, 11.6 mmol) was added and after stirring for additional 30 min at  $-78^\circ\text{C}$ , the reaction was warmed to  $20^\circ\text{C}$ . It was quenched by the addition of saturated aqueous  $\text{NH}_4\text{Cl}$  after 60 min at  $20^\circ\text{C}$ . The aqueous phase was extracted with  $\text{CH}_2\text{Cl}_2$  (3x), the combined organic phases were washed with 1 N HCl (1x), dried over sodium sulfate, filtered and the solvent removed under vacuum to yield crude dialdehyde **7** (500 mg), which was used without further purification.

$^1\text{H NMR}$  (600 MHz,  $\text{CDCl}_3$ , 300K)  $\delta$ =9.73 (s, 2H), 1.81-1.76 (m, 4H), 1.31-1.19 (m, 24H), 0.87 (t,  $J = 6.8$  Hz, 6H);  $^{13}\text{C NMR}$  (150 MHz,  $\text{CDCl}_3$ , 300K)  $\delta$ =202.3 (CH, 2C), 65.3 (C), 31.9 ( $\text{CH}_2$ , 2C), 31.1 ( $\text{CH}_2$ , 2C), 30.3 ( $\text{CH}_2$ , 2C), 29.3 ( $\text{CH}_2$ , 2C), 29.3 ( $\text{CH}_2$ , 2C), 24.1 ( $\text{CH}_2$ , 2C), 22.8 ( $\text{CH}_2$ , 2C), 14.2 ( $\text{CH}_3$ , 2C).

**HRMS**(EI) calcd. for  $\text{C}_{19}\text{H}_{37}\text{O}_2$   $[\text{M} + \text{H}]^+$ : 297.2788, found: 297.2784.

### 9,9-di-*n*-octyl-2,4,6,8-tetraazabicyclo[3.3.1]nonane-3,7-dione (**3**)

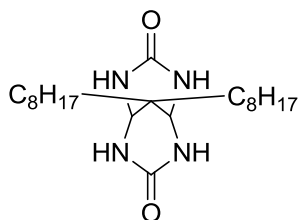

To a mixture of crude dialdehyde **7** (500 mg, th: 1.66 mmol) in acetic acid (1.0 mL) was added urea (219 mg, 3.65 mmol) and a drop of conc. sulfuric acid. After heating at 100 °C for 2h, the mixture was cooled to 20 °C and water (10 mL) was added. The solid was filtered through a glass frit, washed with water (2x) and hexane (2x) and dried under vacuum to give propanediurea **3** (510 mg, 81% over 2 steps) as a white crystalline solid.

<sup>1</sup>H NMR (600 MHz, d6-DMSO, 343K) δ=6.62 (s, 4H), 3.95 (s, 2H), 1.45 (s, 4H), 1.28 (s, 24H), 0.88 (t, *J* = 7.0 Hz, 6H).

<sup>13</sup>C NMR (150 MHz, d6-DMSO, 343K) δ=153.8 (C, 2C), 61.6 (CH, 2C), 34.7 (C), 30.8 (CH<sub>2</sub>, 2C), 29.3 (CH<sub>2</sub>, 2C), 29.2 (CH<sub>2</sub>, 2C), 28.3 (CH<sub>2</sub>, 2C), 28.1 (CH<sub>2</sub>, 2C), 22.5 (CH<sub>2</sub>, 2C), 21.5 (CH<sub>2</sub>, 2C), 13.3 (CH<sub>3</sub>, 2C).

HRMS(EI) calcd. for C<sub>21</sub>H<sub>41</sub>N<sub>4</sub>O<sub>2</sub> [M +H]<sup>+</sup>: 381.3224, found: 381.3222.

Mp > 210 °C

IR  $\tilde{\nu}$ = 3258 (br), 2920, 2851, 1641, 1525, 1461, 1215, 1125, 771 cm<sup>-1</sup>

### Synthesis of nonadeca-8,11-diyn-10-one (**5**)

The literature procedure for heneicosa-9,12-diyn-11-one<sup>4</sup> was adapted:

#### nonadeca-8,11-diyn-10-ol

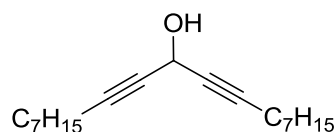

To a solution of 1-nonyne (0.80 mL, 4.88 mmol) in Et<sub>2</sub>O (6.5 mL) was added *n*-BuLi (1.6 M in hexane, 3.0 mL, 4.86 mmol) at -78 °C. After stirring at that temperature for 30 min, ethyl formate (0.16 mL, 2.02 mmol) in Et<sub>2</sub>O (1.0 mL) was added. The

solution was allowed to warm to 20 °C over 30 min and subsequently quenched by the addition of aq. NH<sub>4</sub>Cl-solution (10 mL). The aqueous phase was extracted with Et<sub>2</sub>O (2x), the combined organic phases were dried over sodium sulfate, filtered and the solvent removed under vacuum. Purification by column chromatography (60 mL silica gel) using hexane/ethyl acetate 18:1 → 15:1 as an eluent yielded nonadeca-8,11-diyn-10-ol (396 mg, 71%) as a colorless oil.

<sup>1</sup>H NMR (600 MHz, CDCl<sub>3</sub>, 300K) δ=5.09 (dt, *J* = 7.1, 2.0 Hz, 1H), 2.22 (td, *J* = 7.2, 2.0 Hz, 4H), 2.03 (d, *J* = 7.1 Hz, 1OH), 1.57 – 1.48 (m, 4H), 1.44 – 1.34 (m, 4H), 1.34 – 1.21 (m, 12H), 0.88 (t, *J* = 7.0 Hz, 6H).

<sup>13</sup>C NMR (150 MHz, CDCl<sub>3</sub>, 300K) δ=85.3 (C, 2C), 78.2 (C, 2C), 52.8 (CH), 31.9 (CH<sub>2</sub>, 2C), 29.0 (CH<sub>2</sub>, 2C), 28.9 (CH<sub>2</sub>, 2C), 28.5 (CH<sub>2</sub>, 2C), 22.8 (CH<sub>2</sub>, 2C), 18.9 (CH<sub>2</sub>, 2C), 14.2 (CH<sub>3</sub>, 2C).

HRMS(EI) calcd. for C<sub>19</sub>H<sub>32</sub>ONa [M+Na]<sup>+</sup>: 299.2345, found: 299.2354.

IR  $\tilde{\nu}$ = 2925, 2855, 2204, 1627, 1461, 1326, 1237, 722 cm<sup>-1</sup>

### nonadeca-8,11-diyn-10-one (5)

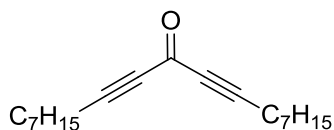

To a solution of nonadeca-8,11-diyn-10-ol (250 mg, 0.90 mmol) in CH<sub>2</sub>Cl<sub>2</sub> (9.2 mL) was added celite (0.27 g), molecular sieves powder (4Å, 0.27 g) and pyridinium chlorochromate (291 mg, 1.35 mmol) at 20 °C. After stirring at that temperature for 2 h, the mixture was filtered through a plug of silica gel (15 mL), eluted with CH<sub>2</sub>Cl<sub>2</sub> and concentrated under vacuum. Purification by column chromatography (50 mL silica gel) using hexane/ethyl acetate 15:1 as an eluent yielded nonadeca-8,11-diyn-10-one (5) (196 mg, 79%) as a colorless oil.

**<sup>1</sup>H NMR** (600 MHz, CDCl<sub>3</sub>, 300K) δ=2.38 (t, *J* = 7.2 Hz, 4H), 1.63 – 1.55 (m, 4H), 1.45 – 1.36 (m, 4H), 1.35 – 1.23 (m, 12H), 0.89 (t, *J* = 7.0 Hz, 6H).

**<sup>13</sup>C NMR** (150 MHz, CDCl<sub>3</sub>, 300K) δ=161.6 (C), 94.9 (C, 2C), 82.5 (C, 2C), 31.8 (CH<sub>2</sub>, 2C), 29.0 (CH<sub>2</sub>, 2C), 28.8 (CH<sub>2</sub>, 2C), 27.7 (CH<sub>2</sub>, 2C), 22.7 (CH<sub>2</sub>, 2C), 19.3(CH<sub>2</sub>, 2C), 14.2 (CH<sub>3</sub>, 2C).

**HRMS**(EI) calcd. for C<sub>19</sub>H<sub>31</sub>O [M+H]<sup>+</sup>: 275.2369, found: 275.2374.

**IR**  $\tilde{\nu}$ = 2925, 2856, 2206, 1626, 1461, 1326, 1237, 722 cm<sup>-1</sup>

### **General procedure for the encapsulation studies:**

To a mixture of cavitand **1** (4.0 mg, 0.0024 mmol), propanediurea **3** (2.0 mg, 0.0052 mmol in case of C14-C18 *n*-alkane guest; 4.0 mg, 0.0104 mmol in case of C19-C23 *n*-alkane guest) and guest (0.012 mmol in case of C14-C20 *n*-alkane guest; 0.072 mmol in case of C21-C23 *n*-alkane guest) in a NMR-tube was added 1,3,5-trimethylbenzene-d<sub>12</sub> (0.50 mL). The suspension was homogenized by repeated heating via heat gun and agitation. The spectra were recorded after letting the sample equilibrate for 24 h at 20 °C.

### **Determination of guest length**

The length of the guest was estimated by measuring the distance between the hydrogen atoms at each end of the guest as indicated in Figure 1 (using Spartan 03, Wavefunction Inc.). The dihedral angles were fixed at 180° (extended *n*-alkanes) or 60° (coiled *n*-alkanes). To account for the size of the terminal hydrogen atoms, a value of 0.5 Å (approx. the radius of a hydrogen atom) was added to each end (Fig. S1).

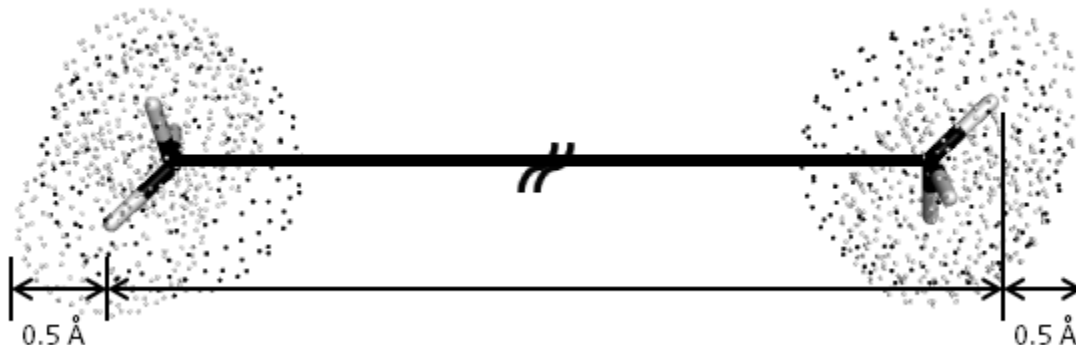

**Figure SI 1:** Determination of the guest length.

### **Determination of packing coefficients (PC)**

The assemblies were first optimized with the appropriate guests inside at molecular mechanics level of theory (Spartan 03, Wavefunction Inc.). In case a guest was too long for the host in the extended conformation (dihedral angle of  $180^\circ$ ), coiling (dihedral angle of  $60^\circ$ ) was applied to the ends of the guest to fit the host dimensions. After optimization of the assemblies, the guest was removed and the file saved in the pdb-format. The determination of the cavity volume was performed using Swiss-PdbViewer 4.0.1 (Swiss Institute of Bioinformatics; <http://www.expasy.org/spdbv/>) at the highest quality level (Surface Preferences: Quality 6). The volume of the guests was determined using the same program. The fraction of  $V(\text{guest})$  to  $V(\text{cavity})$  equals the packing coefficient. All determined values are displayed in Table SI 1.



| guest                                     | volume of guest [Å <sup>3</sup> ] | Cavity volume in host [Å <sup>3</sup> ] |     |     |     | PC [%]    |           | PC [%]    |           |
|-------------------------------------------|-----------------------------------|-----------------------------------------|-----|-----|-----|-----------|-----------|-----------|-----------|
|                                           |                                   | I                                       | II  | III | IV  | in I      | in II     | in III    | in IV     |
| <i>n</i> -C <sub>14</sub> H <sub>30</sub> | 245                               | 486                                     | 524 |     |     | <b>50</b> | 47        |           |           |
| <i>n</i> -C <sub>15</sub> H <sub>32</sub> | 261                               | 494                                     | 524 |     |     | <b>53</b> | 50        |           |           |
| <i>n</i> -C <sub>16</sub> H <sub>34</sub> | 278                               | 510                                     | 524 |     |     | 55        | <b>53</b> |           |           |
| <i>n</i> -C <sub>17</sub> H <sub>36</sub> | 295                               |                                         | 552 |     |     |           | <b>53</b> |           |           |
| <i>n</i> -C <sub>18</sub> H <sub>38</sub> | 312                               |                                         | 582 | 597 |     |           | <b>54</b> | 52        |           |
| <i>n</i> -C <sub>19</sub> H <sub>40</sub> | 328                               |                                         |     | 614 |     |           |           | <b>53</b> |           |
| <i>n</i> -C <sub>20</sub> H <sub>42</sub> | 346                               |                                         |     | 650 |     |           |           | <b>53</b> |           |
| <i>n</i> -C <sub>21</sub> H <sub>44</sub> | 362                               |                                         |     | 653 | 665 |           |           | 55        | <b>54</b> |
| <i>n</i> -C <sub>22</sub> H <sub>46</sub> | 379                               |                                         |     |     | 685 |           |           |           | <b>55</b> |
| <i>n</i> -C <sub>23</sub> H <sub>48</sub> | 396                               |                                         |     |     | 713 |           |           |           | <b>56</b> |

**Table SI 1:** Measured guest and cavity volumes and the corresponding packing coefficients.

## 1H-NMR spectra of encapsulated *n*-tetradecane in host I/II

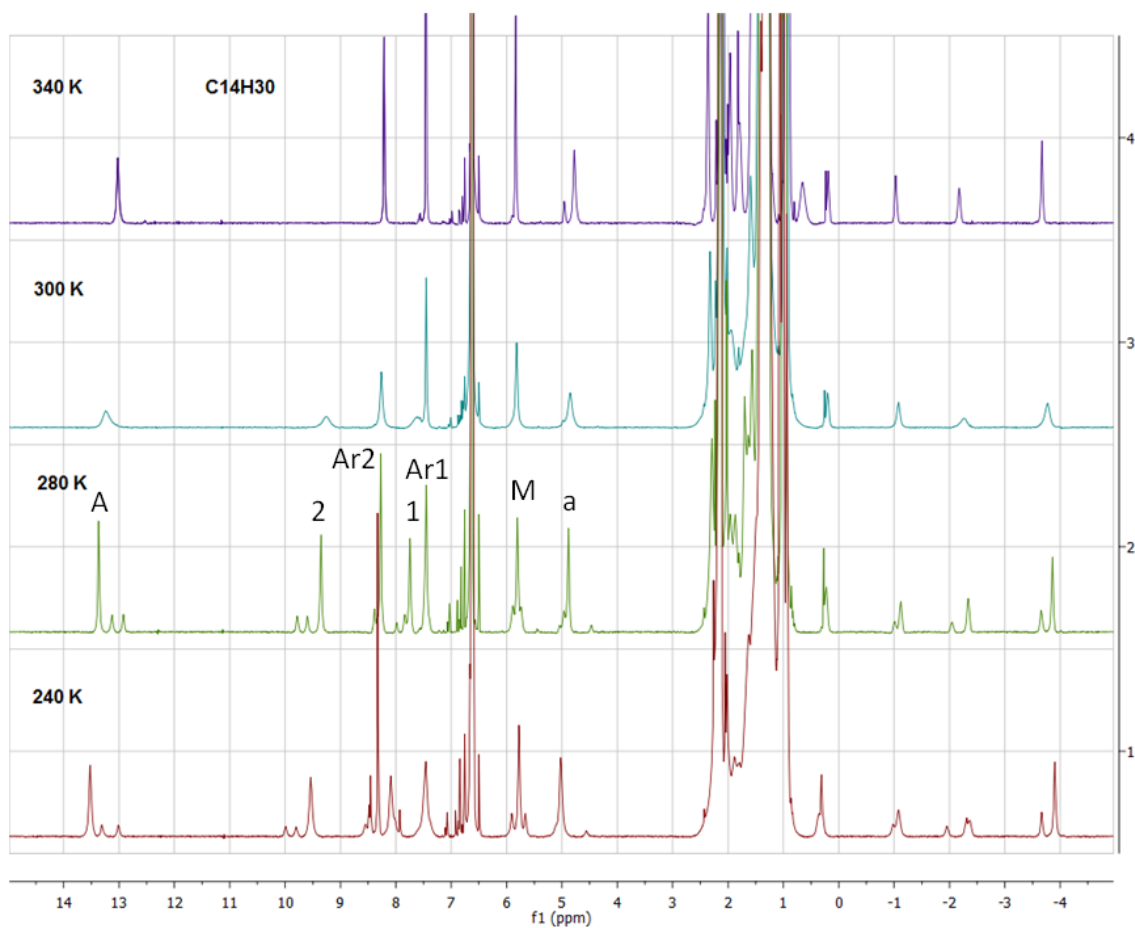

Fig. SI 2: <sup>1</sup>H-NMR spectra of encapsulated *n*-tetradecane in host I/II at 240-340 K.

## 1H-NMR spectra of encapsulated *n*-pentadecane in host I/II

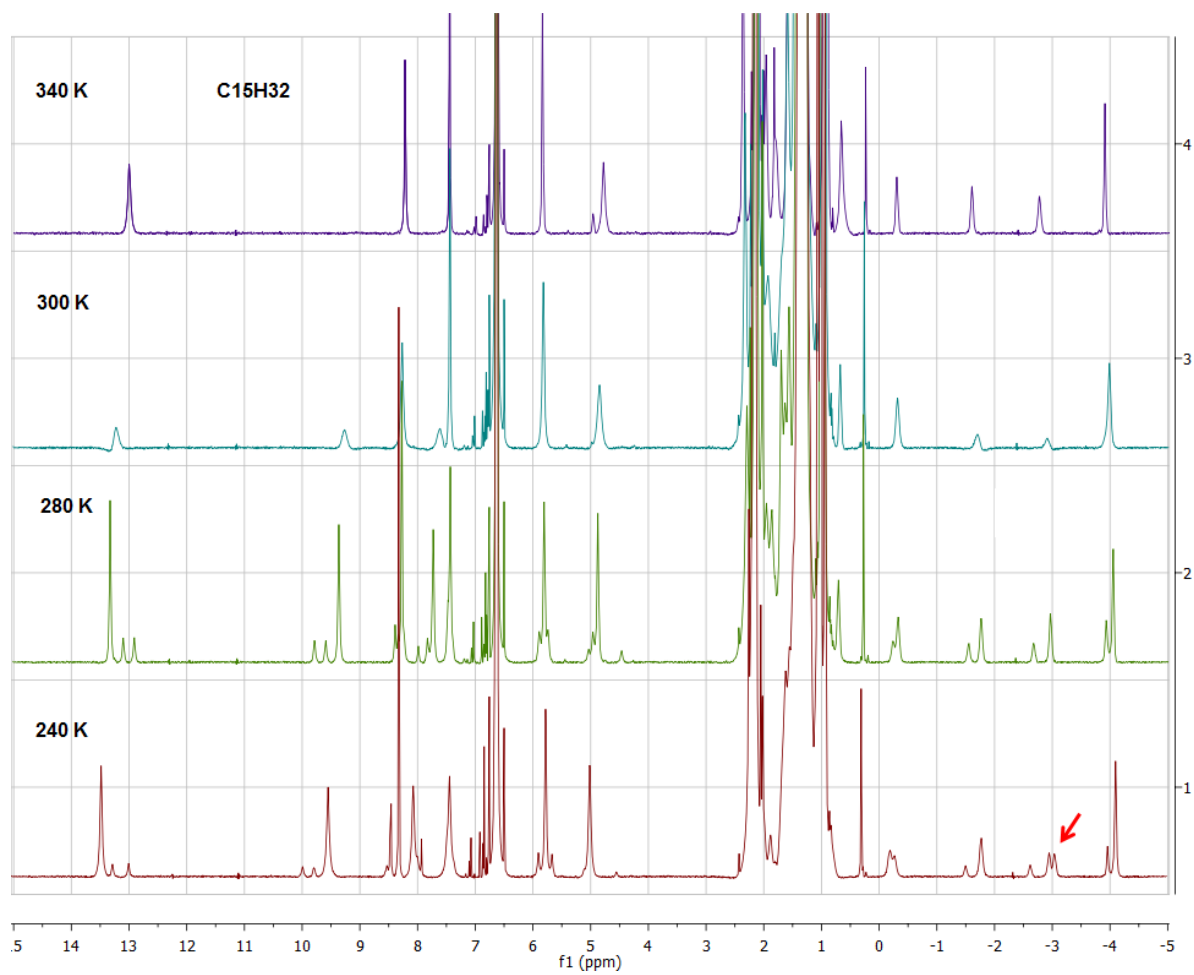

**Fig. SI 2a:** <sup>1</sup>H-NMR spectra of encapsulated *n*-pentadecane in host I/II at 240-340 K.

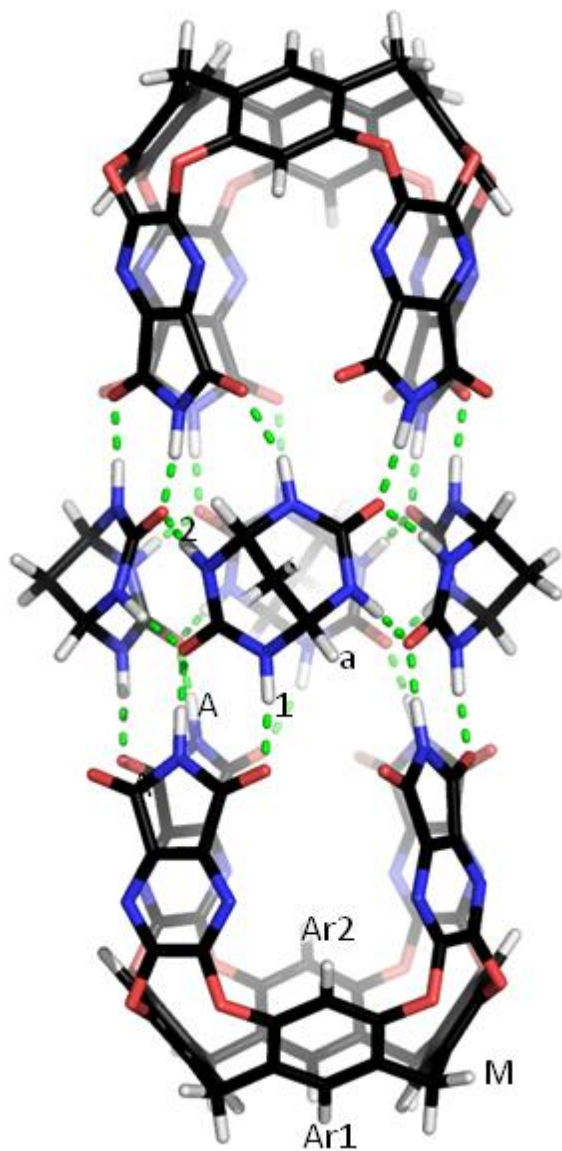

**Fig. SI 3:** Model of host I (1.3<sub>4</sub>.1) and assignment of proton-signals (cf. Fig. SI 2)

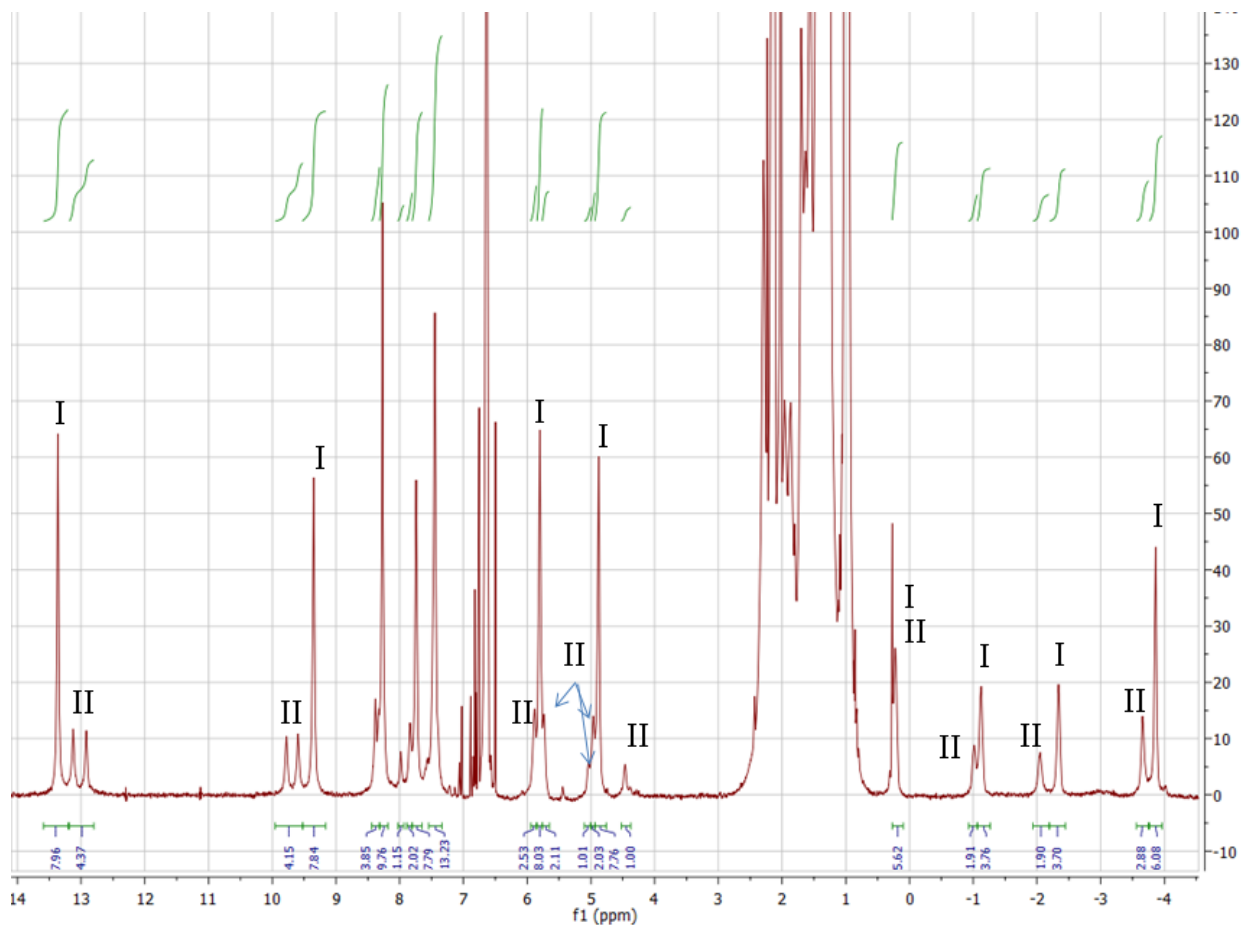

**Fig. SI 4:** Integrated <sup>1</sup>H-NMR spectra of encapsulated n-tetradecane in host I/II at 280 K.

ROESY spectrum of encapsulated *n*-pentadecane in host I/II at 280 K.

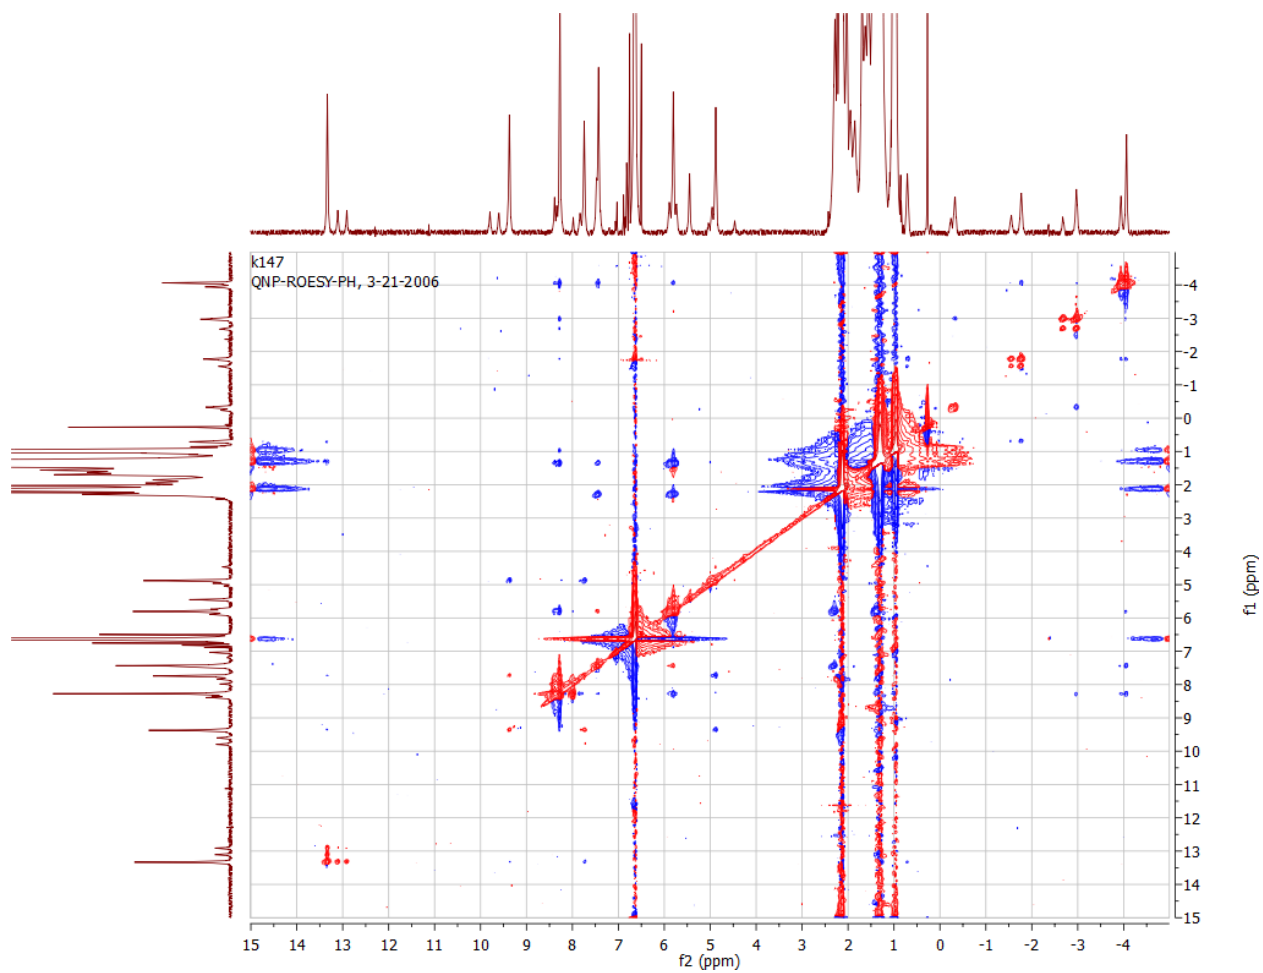

Fig. SI 5: ROESY spectrum of encapsulated *n*-pentadecane in host I/II at 280 K

## NMR spectra of encapsulated *n*-heptadecane in host II

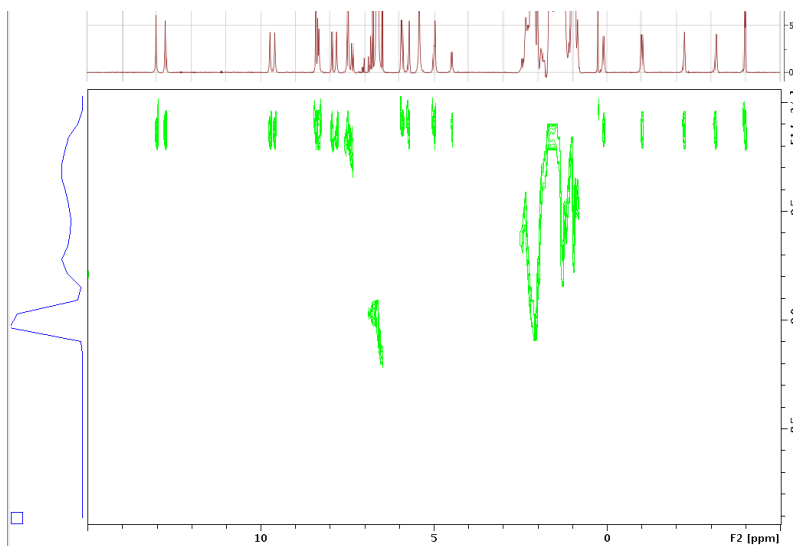

Fig. SI 6: DOSY spectrum of encapsulated *n*-heptadecane in host II.

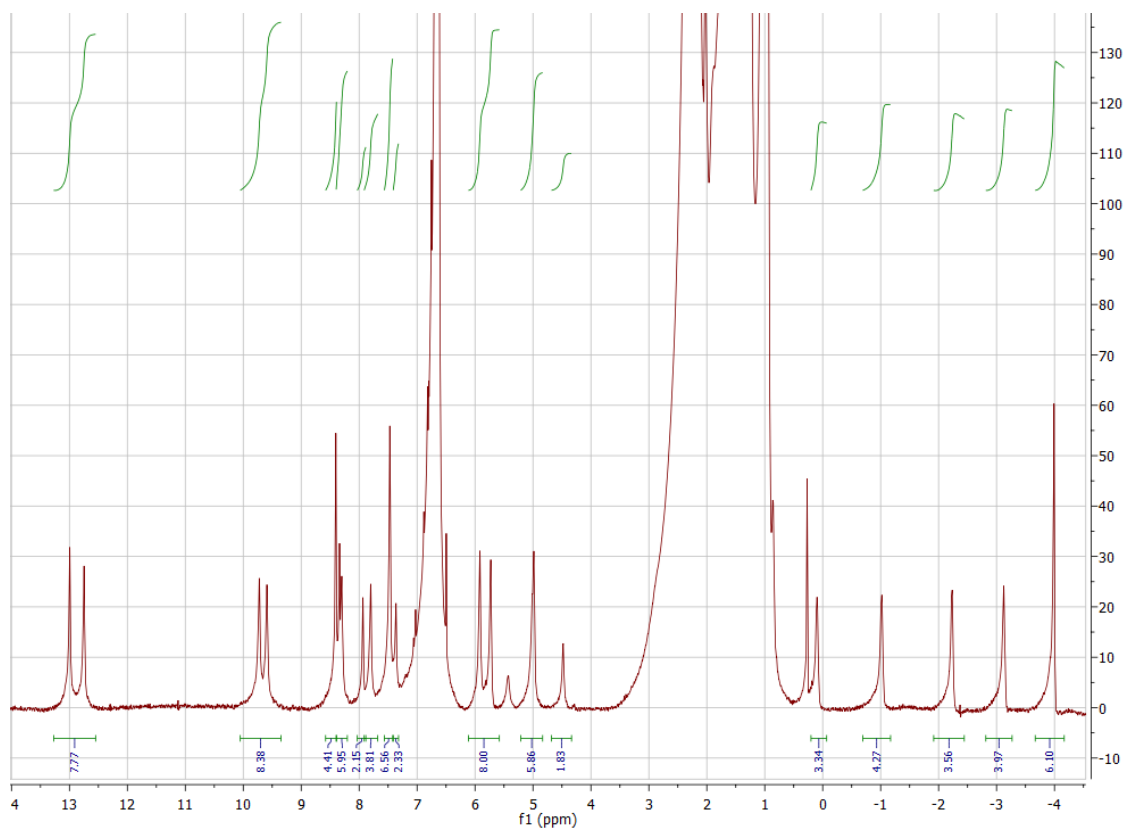

Fig SI 7: Integrated <sup>1</sup>H-NMR spectra of encapsulated *n*-heptadecane in host II at 280 K.

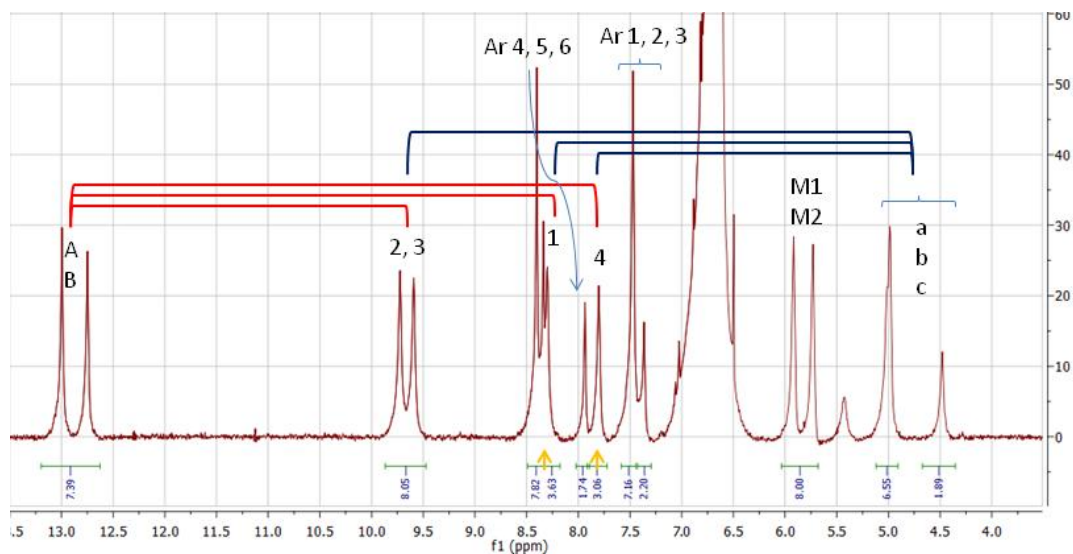

**Fig. SI 8:** Observed NOE-signals in assembly II ( $1.3'_{2-3_{2-1}}$ ) with *n*-heptadecane as guest (cf. Fig. SI 11).

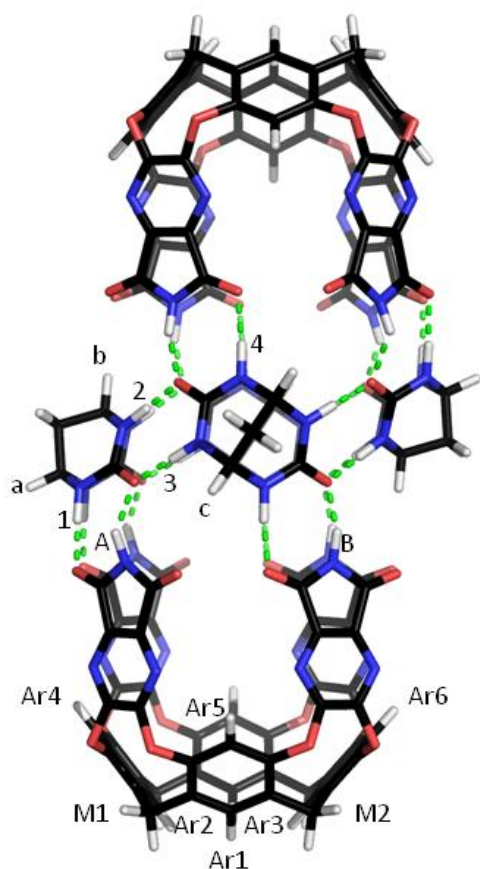

**Fig. SI 9:** Proposed structure of the achiral capsule II ( $1.3'_{2-3_{2-1}}$ ). The  $C_{2h}$ -symmetry accounts for the doubling of the  $^1H$ -NMR signals: There are two magnetically different imide N-H signals (A and B), two ureido NH-signals binding to another PD-unit (2, 3), six non-equivalent aromatic signals (Ar1-6), two different ureido NH-signals binding to an imide-carbonyl (1, 4), two non-equivalent methine signals (M1 and M2) and three distinct PD-signals (a-c).



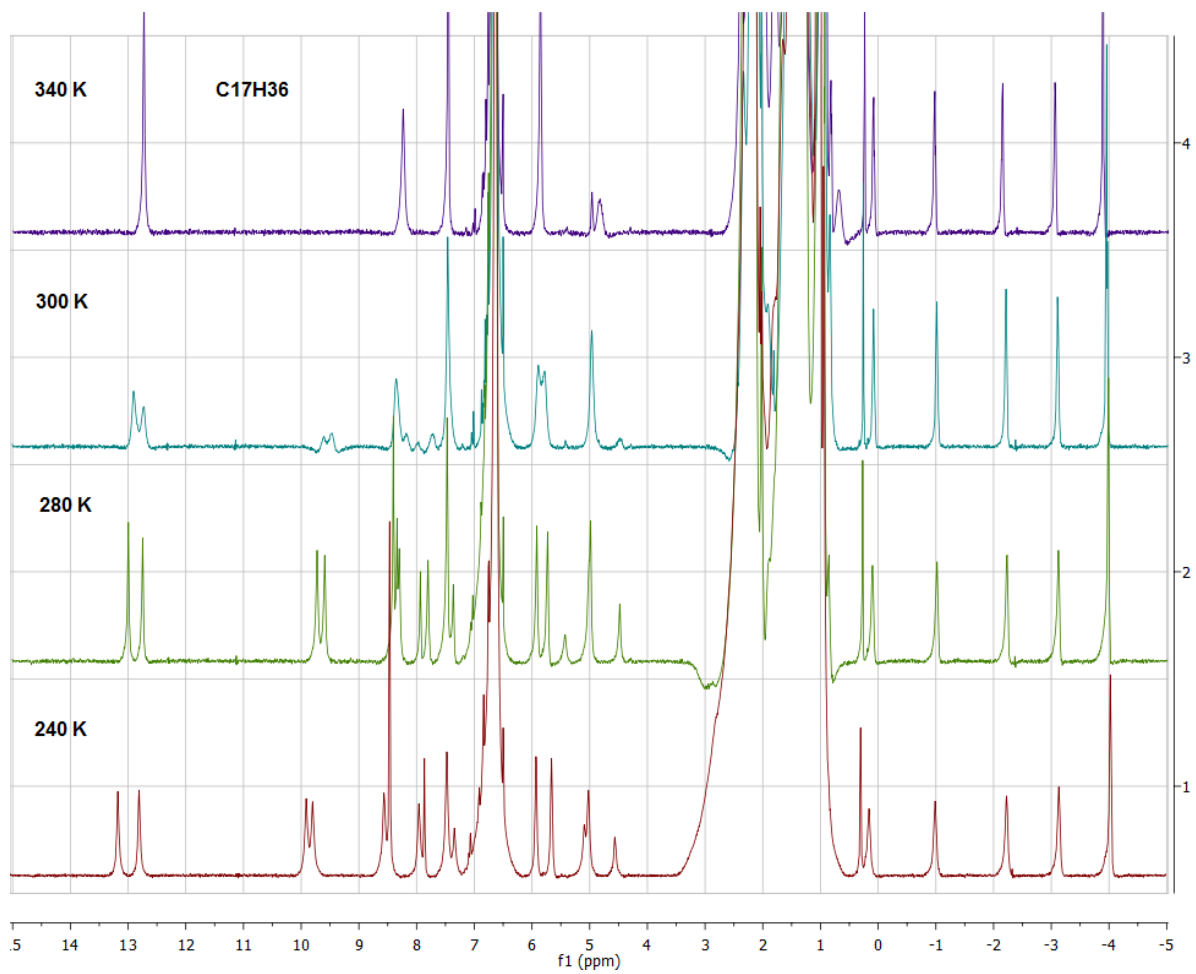

**Fig. SI 10:** <sup>1</sup>H-NMR spectra of encapsulated *n*-heptadecane in host II at 240 – 340 K.

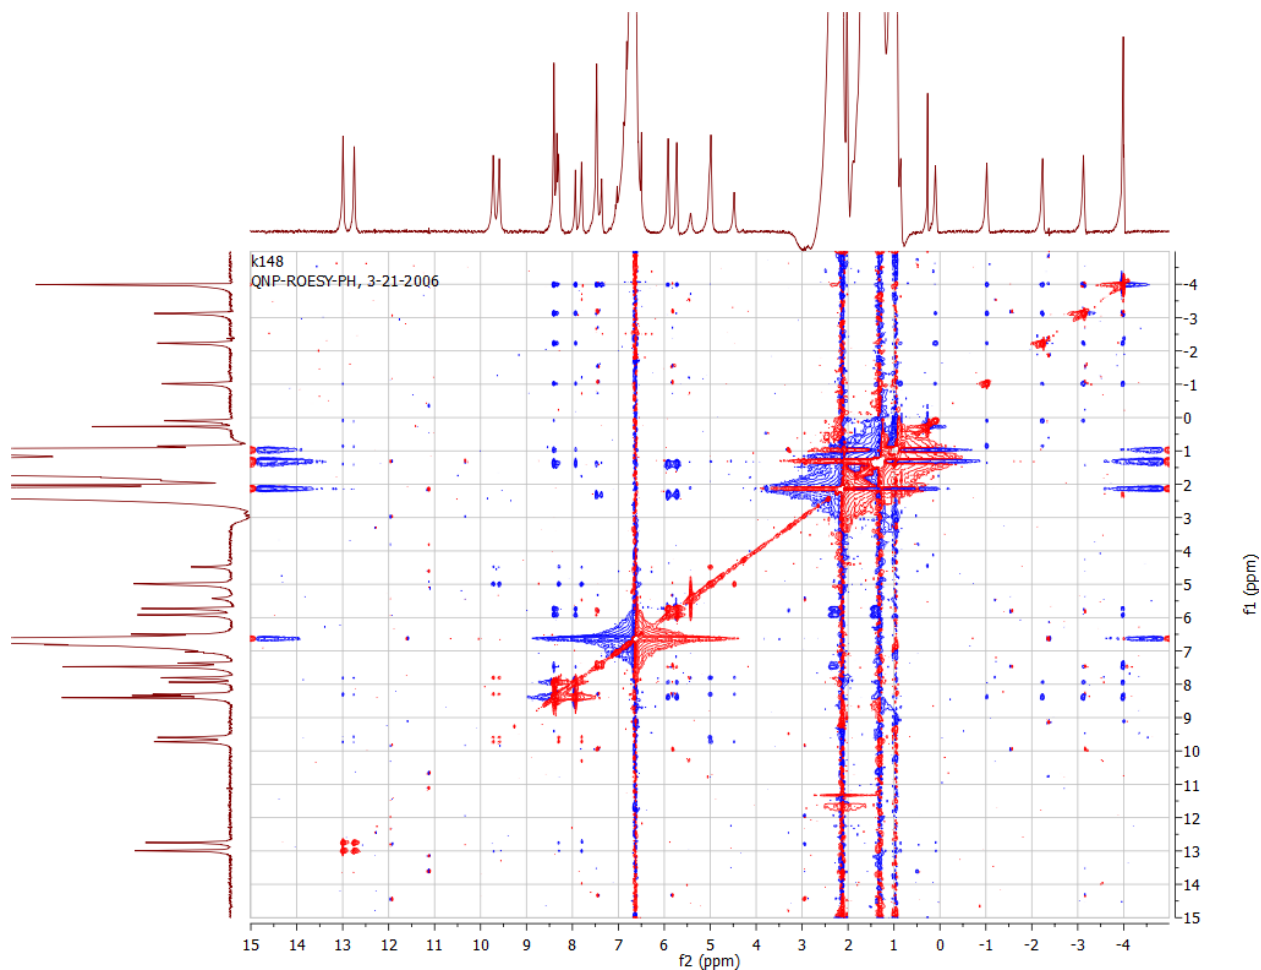

**Fig. SI 11:** ROESY spectrum of encapsulated *n*-heptadecane in host **II** at 280 K. The NOE-signals of this spectrum are displayed in Fig. SI 8.

### Encapsulation of 2-heptadecanol in host **II**

Due to the non-symmetry of the guest 2-heptadecanol, four imide-signals should be detectable (as compared to two in the case of the symmetric *n*-heptadecane). The further splitting (at ca. 12.7 ppm, at 240K and 280K) is caused by the magnetic non-equivalence of the enantiotopic signals in the chiral field. Splitting of the other enantiotopic protons of the host is not clearly identifiable, due to signal overlap in the aromatic region.

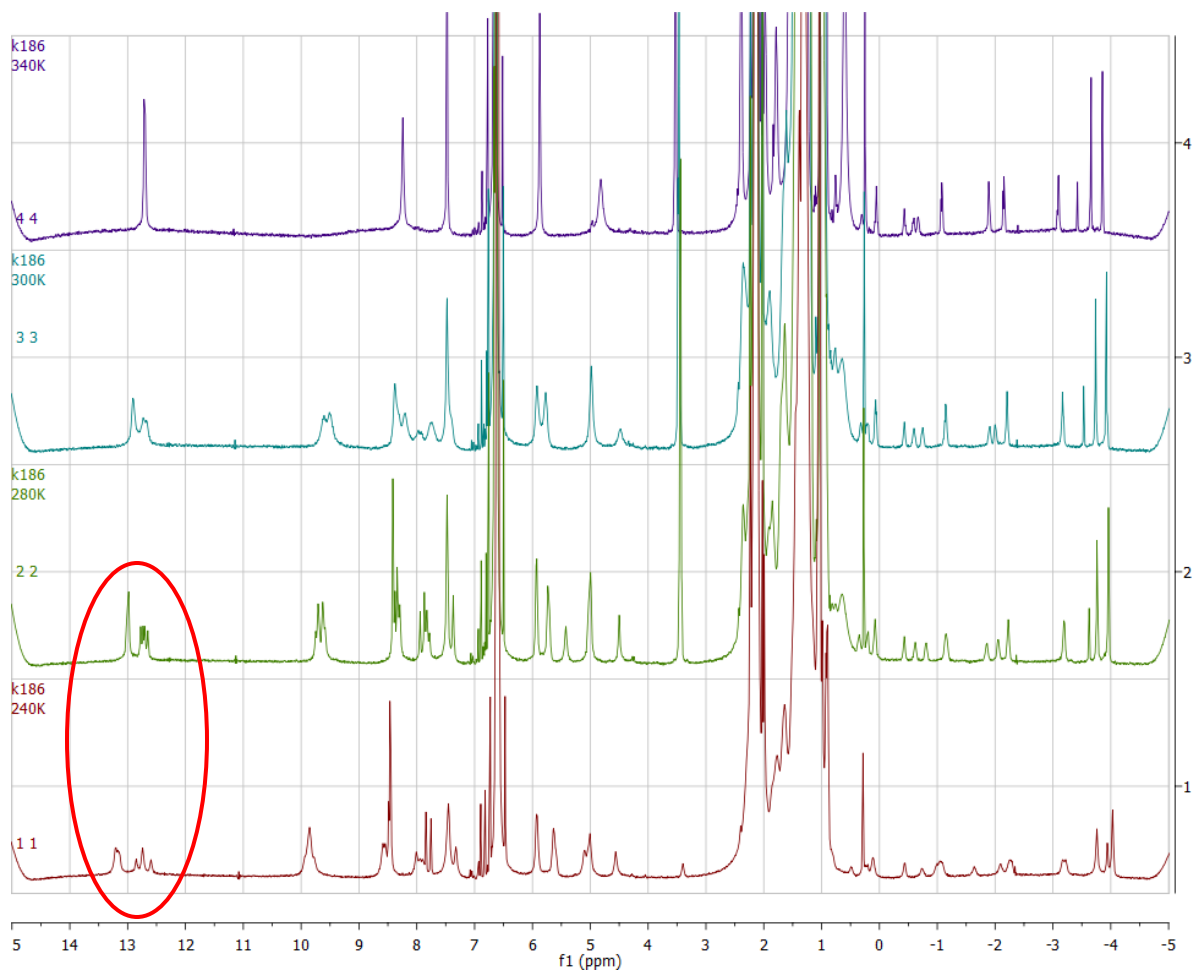

**Fig. SI 12:** Encapsulation of 2-heptadecanol results in a local chiral field and resolution of enantiopic imid-signals in **1.3'<sub>2</sub>.3<sub>2</sub>.1 (II)**.

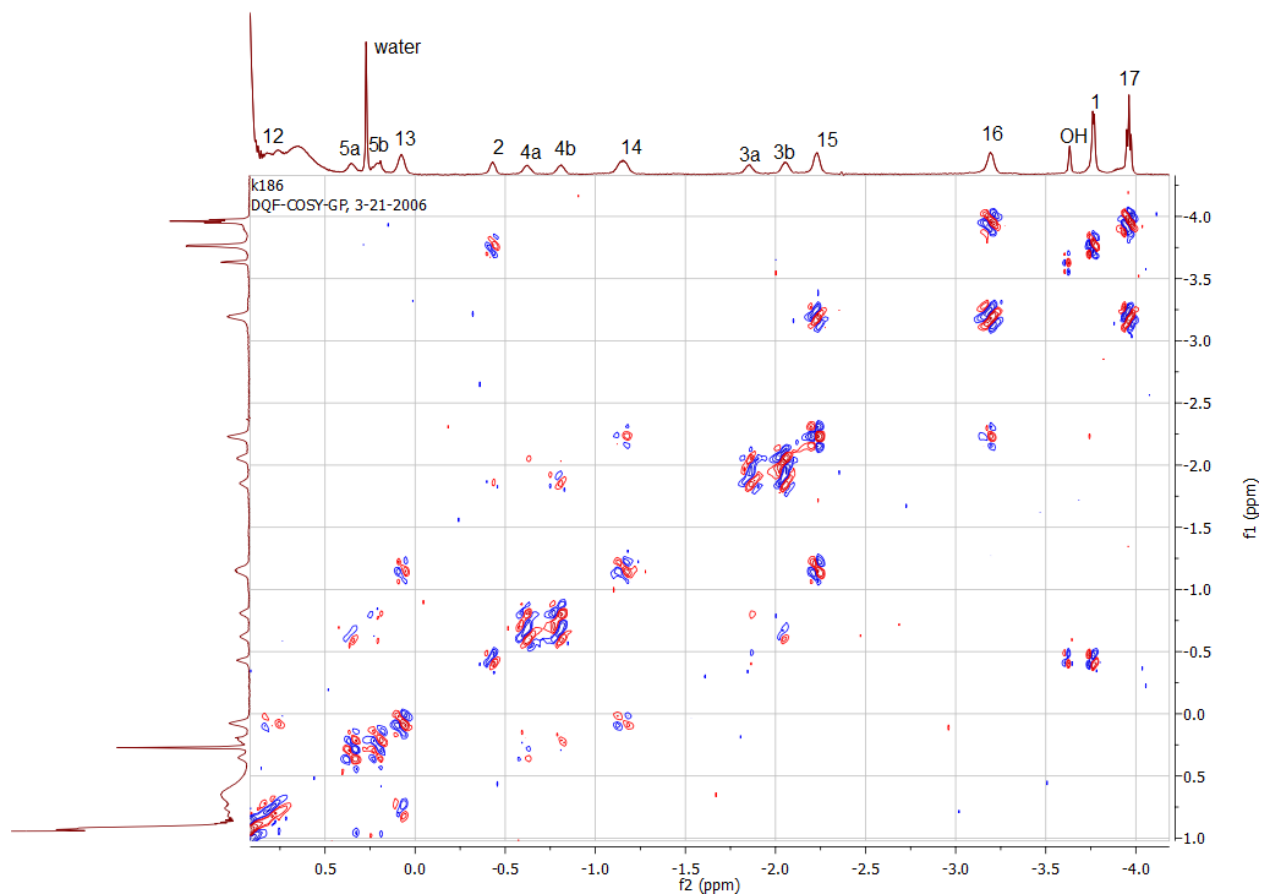

**Fig. SI 13:** Proton correlation (COSY) of encapsulation of 2-heptadecanol in  $1.3'_2.3_2.1$  (II).

## NMR spectra of encapsulated *n*-octadecane in host II/III

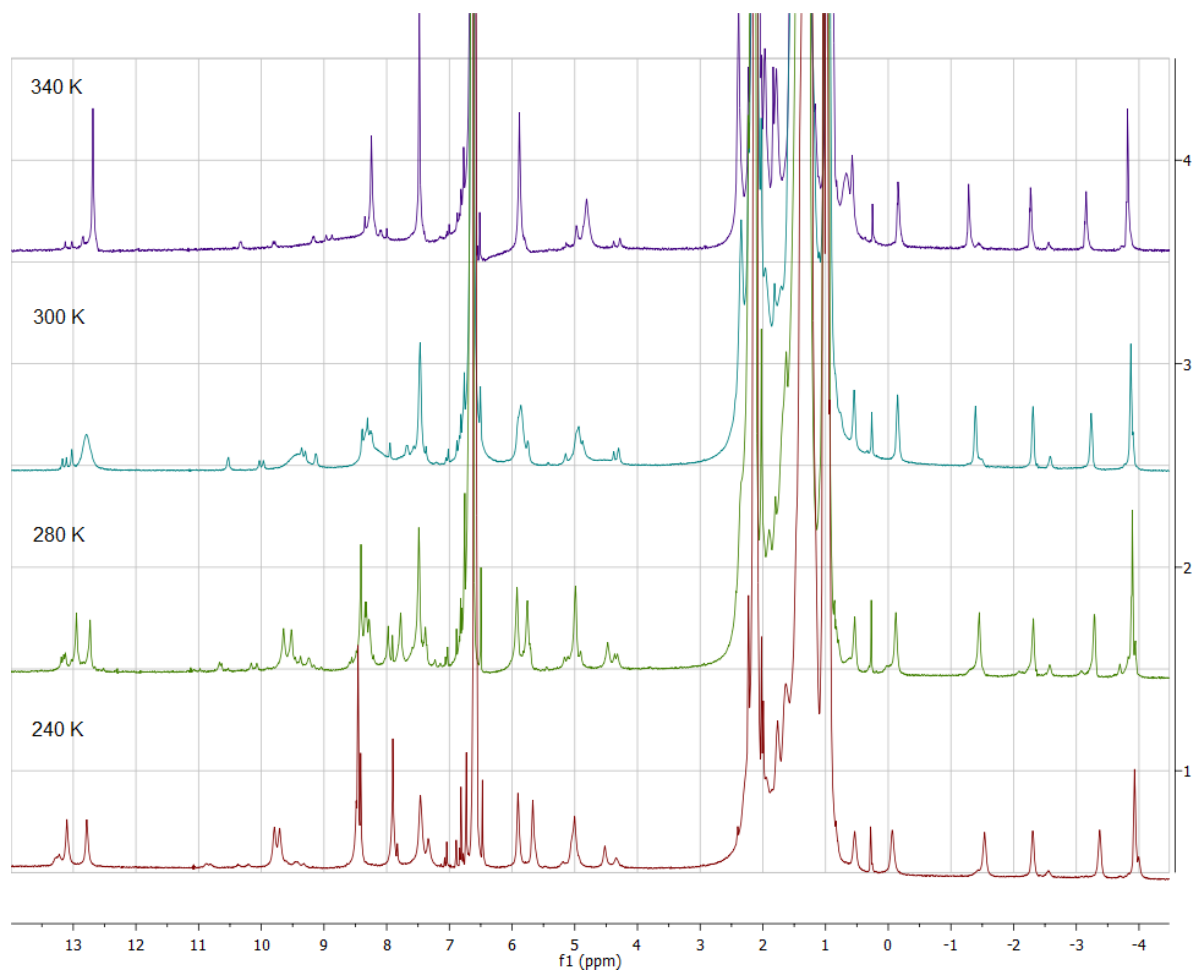

**Fig. SI 14:** NMR spectra of encapsulated *n*-octadecane in host II/III at 240 – 340 K.

## NMR spectra of encapsulated *n*-nonadecane in host III

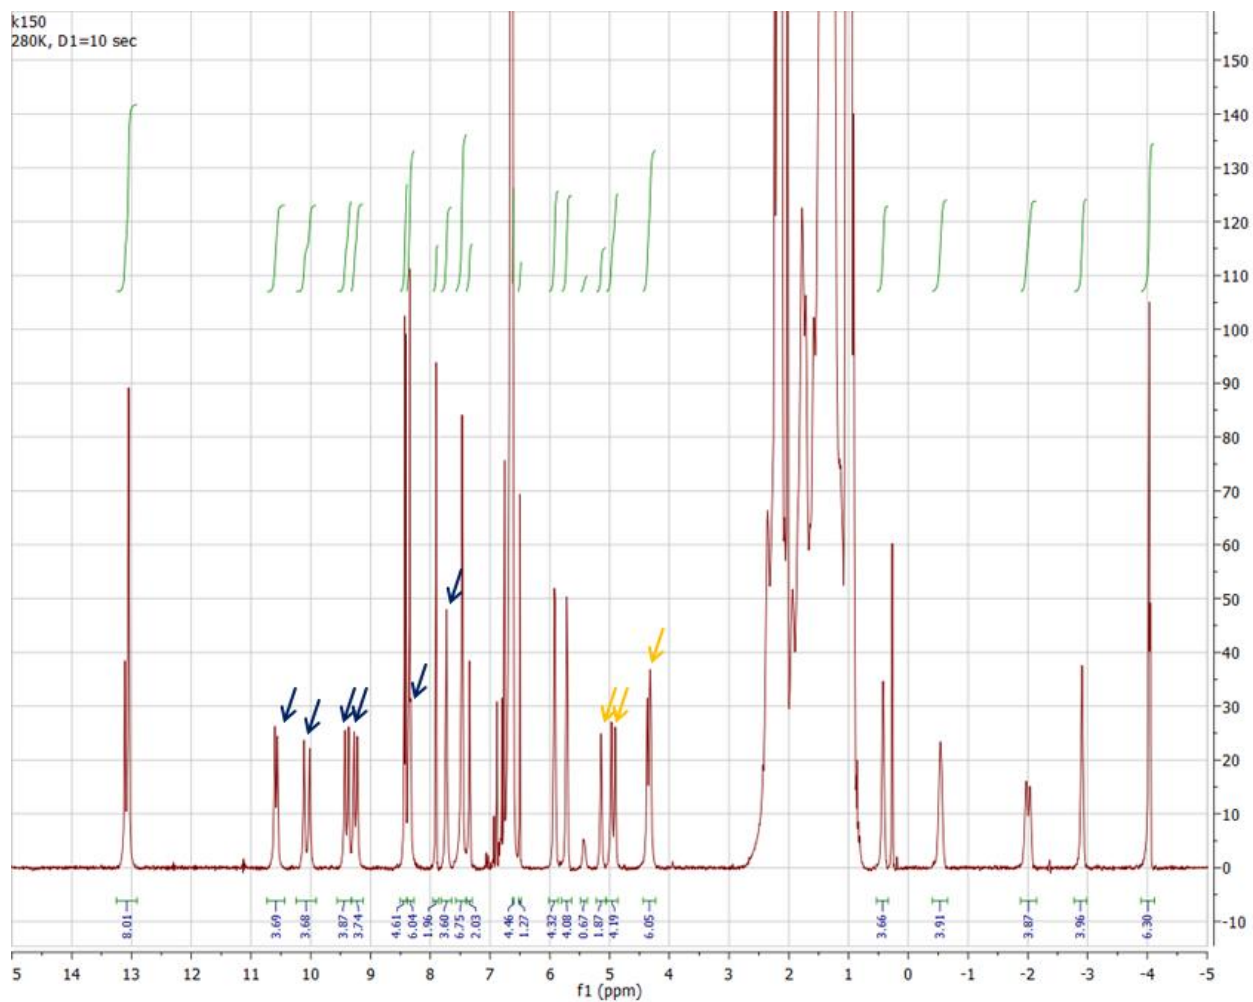

**Fig. SI 15:** <sup>1</sup>H-NMR spectrum of encapsulated *n*-nonadecane. Integration of the propanediurea-NH protons (marked in blue) as well as integration of the propanediurea-bridgehead protons (marked in yellow) reveal the presence of six PD-units in the assembly **III**.

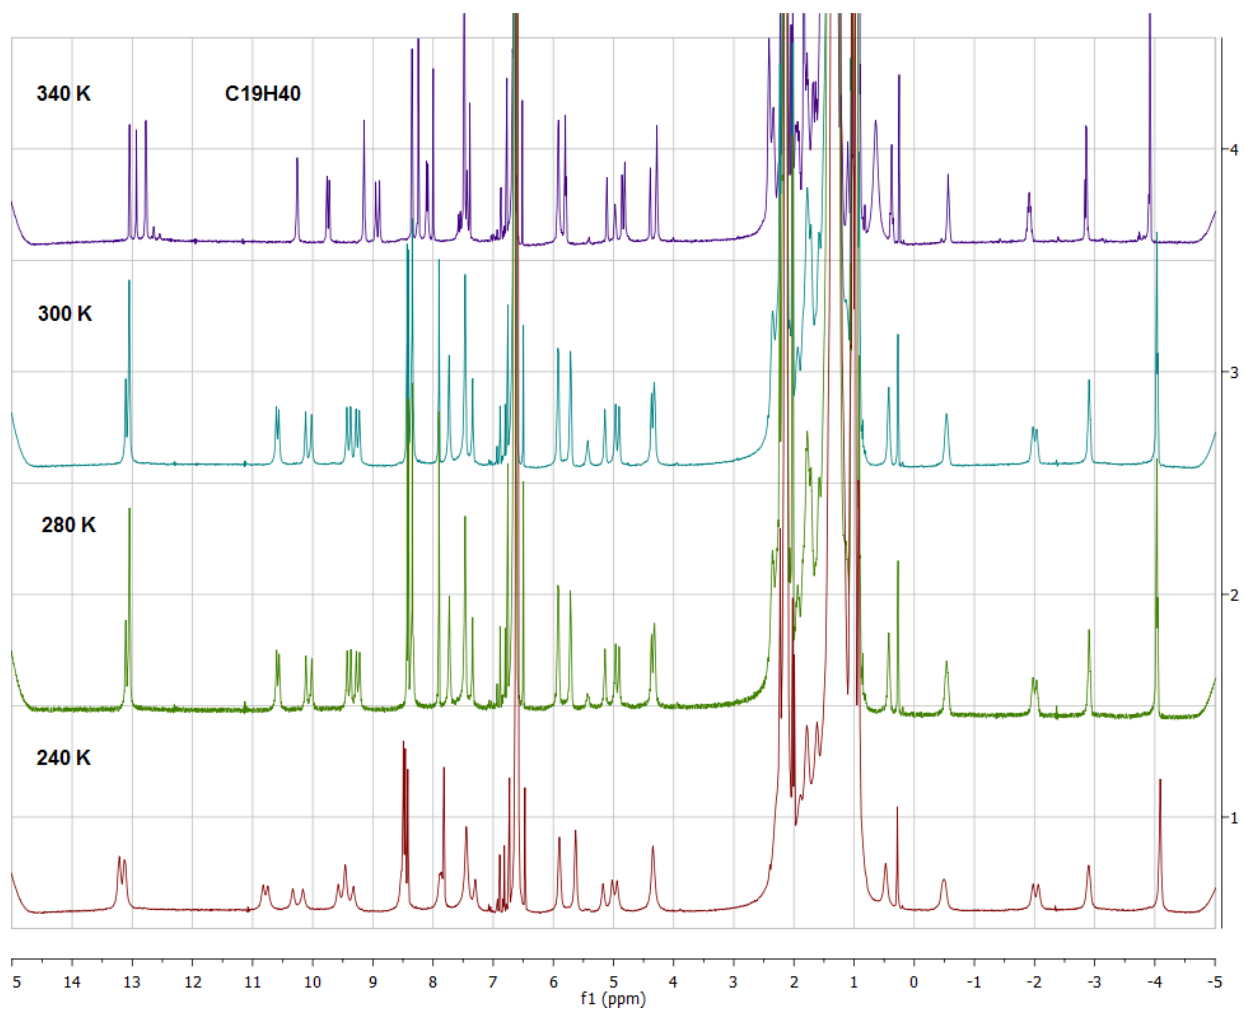

**Fig. SI 16:** <sup>1</sup>H-NMR of assembly III with encapsulated *n*-nonadecane at 240 – 340 K. Diastereotopic CH<sub>2</sub>-guest signals are observed at 240-300 K, indicating a chiral assembly.

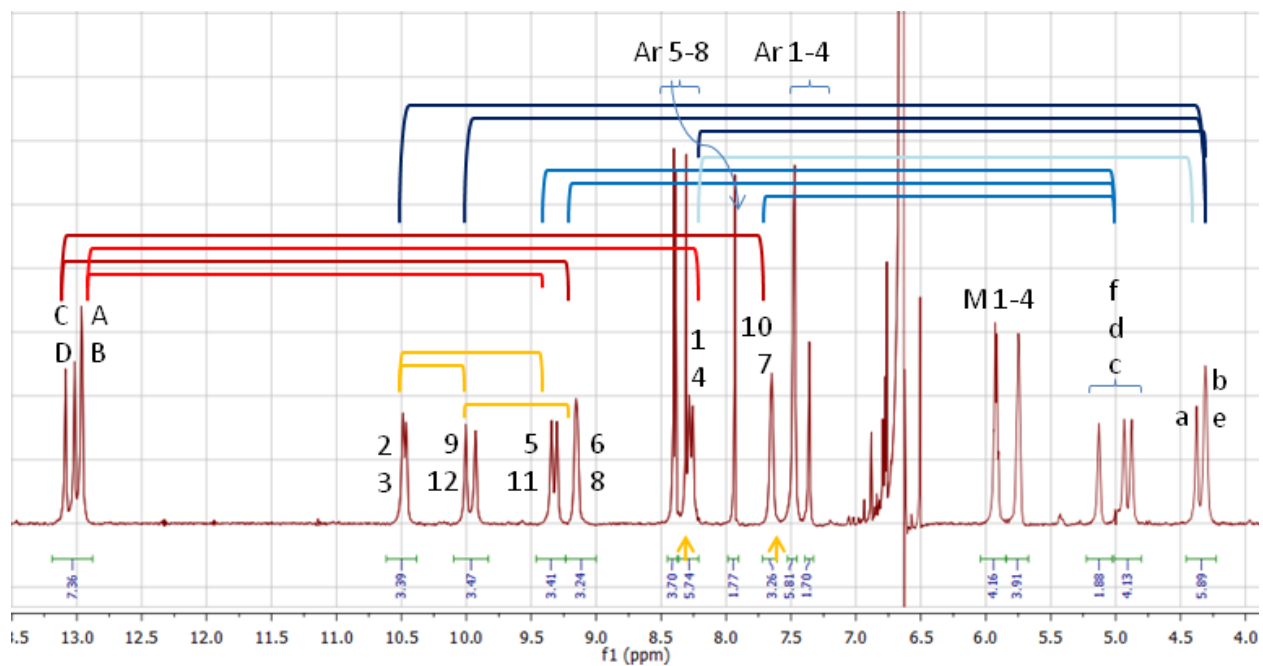

Fig. SI 17: Observed NOE-signals in assembly III ( $1.3'_{2,3,4,1}$ ) with *n*-nonadecane as guest (cf. Fig. SI 20).

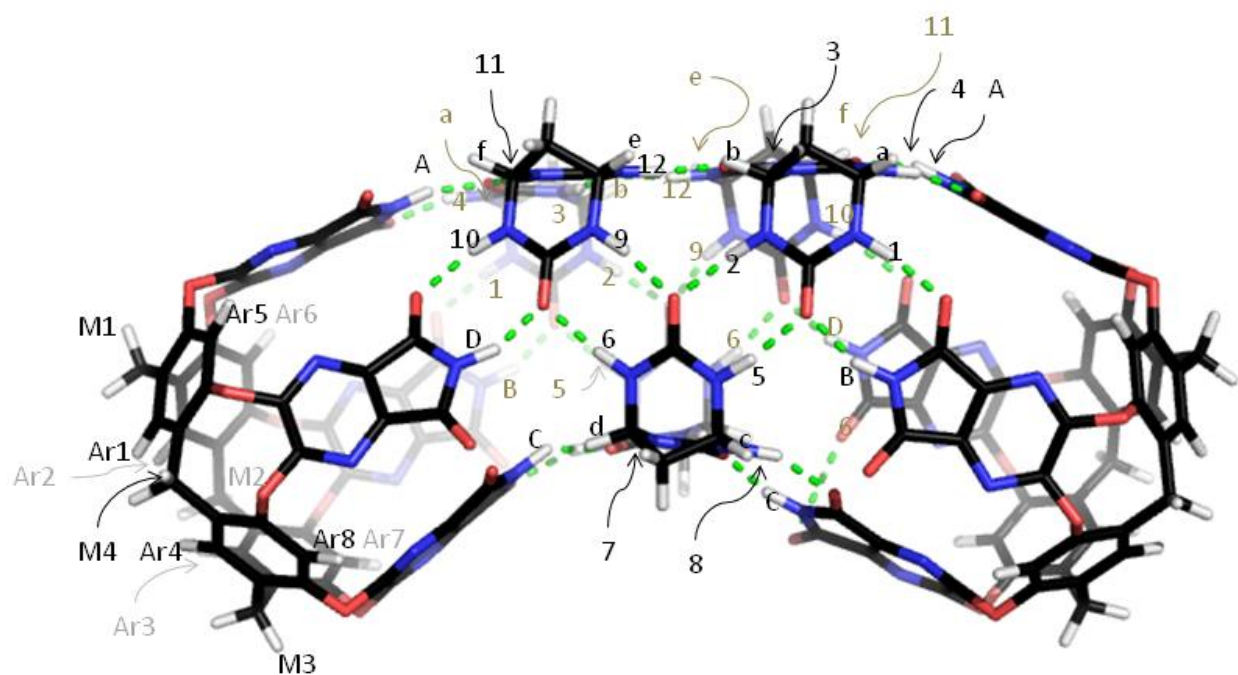

Fig. SI 18: Model of the assembly III ( $1.3'_{2,3,4,1}$ )- side view.



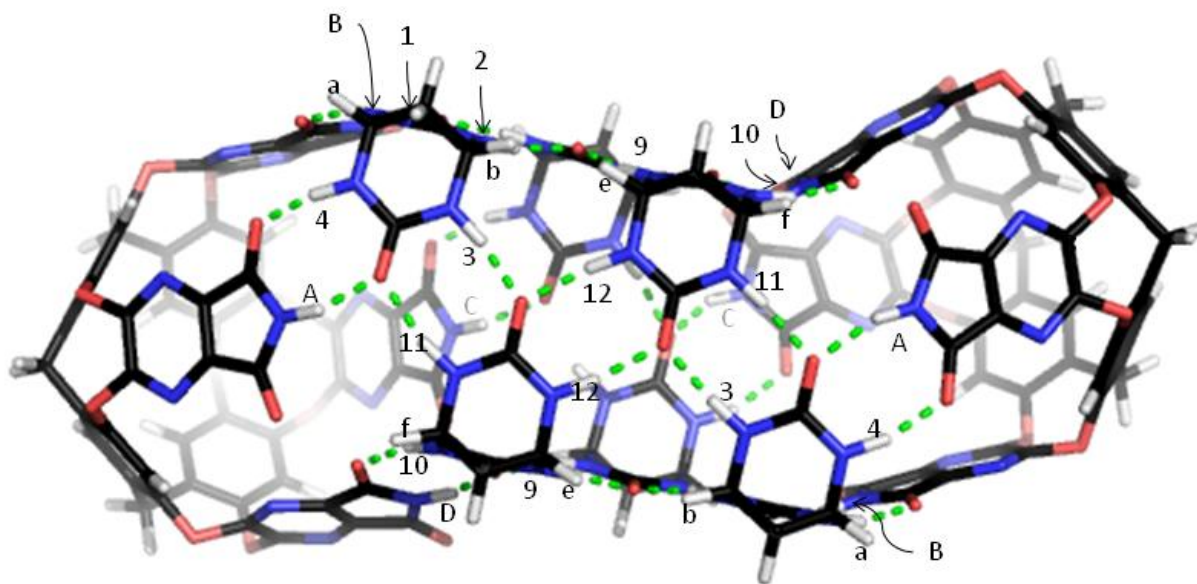

(top view)

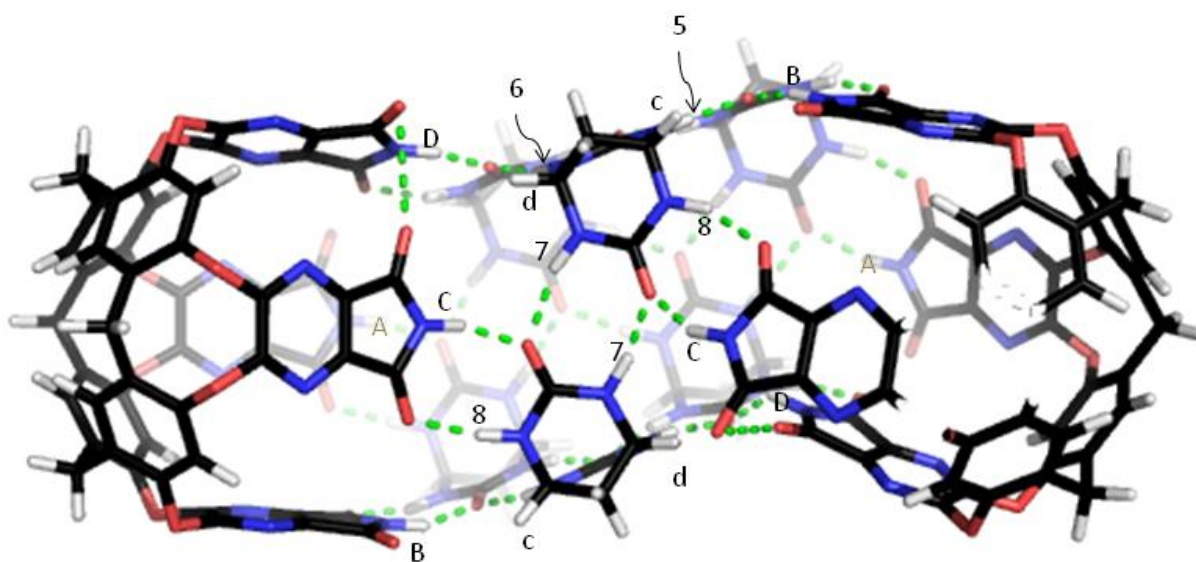

(bottom view)

**Fig. SI 19:** Different views of assembly III (1.3'2.34.1).

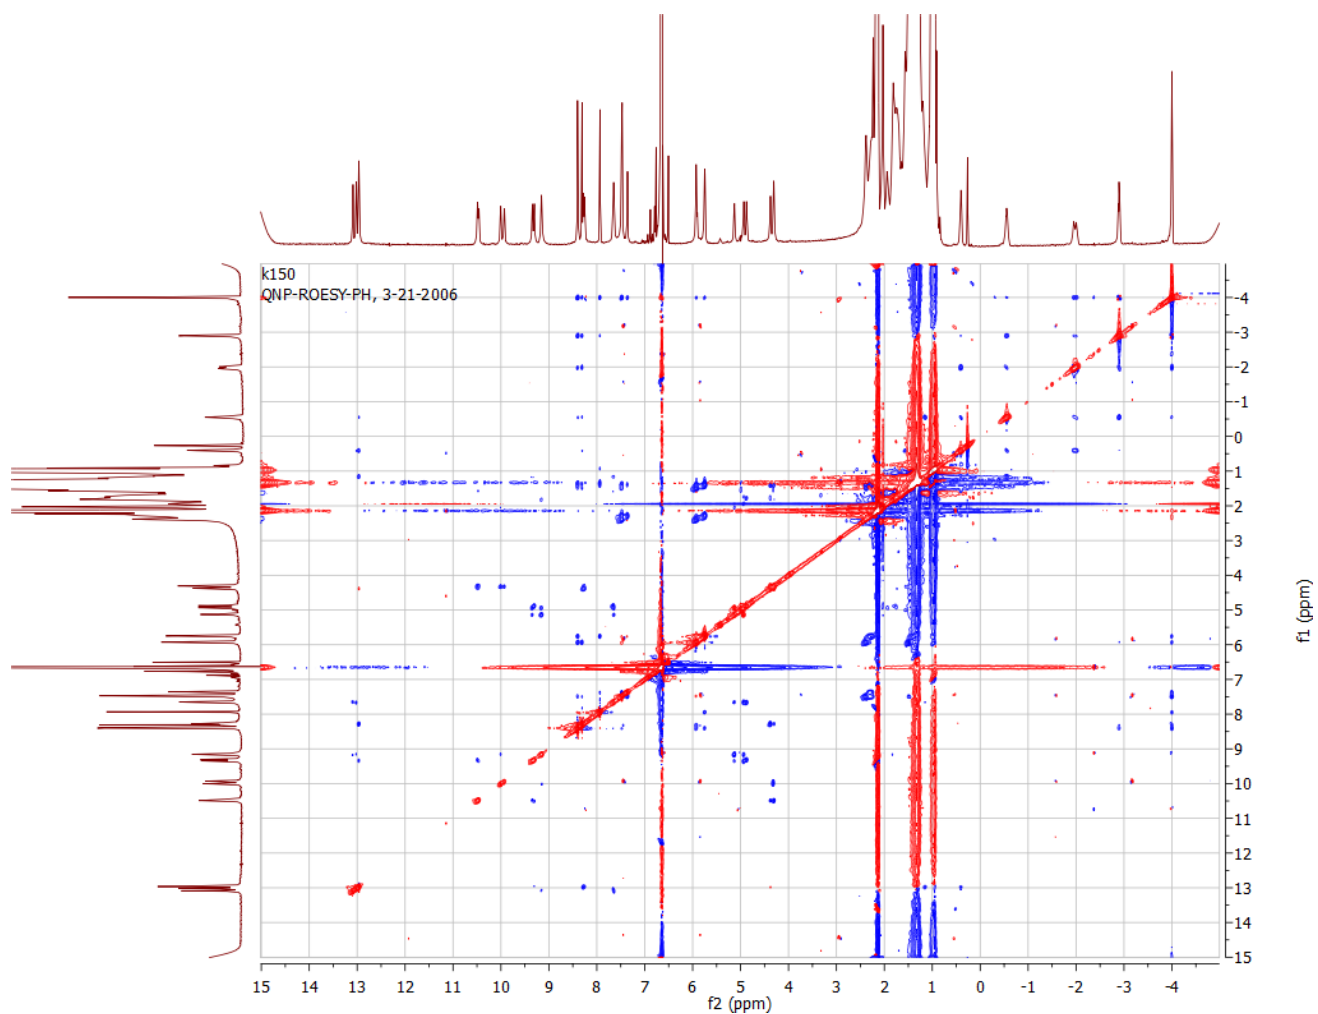

**Fig. SI 20:** ROESY spectrum of the assembly **III** with encapsulated *n*-nonadecane. The observed NOE-signals are displayed in Fig. SI 17.

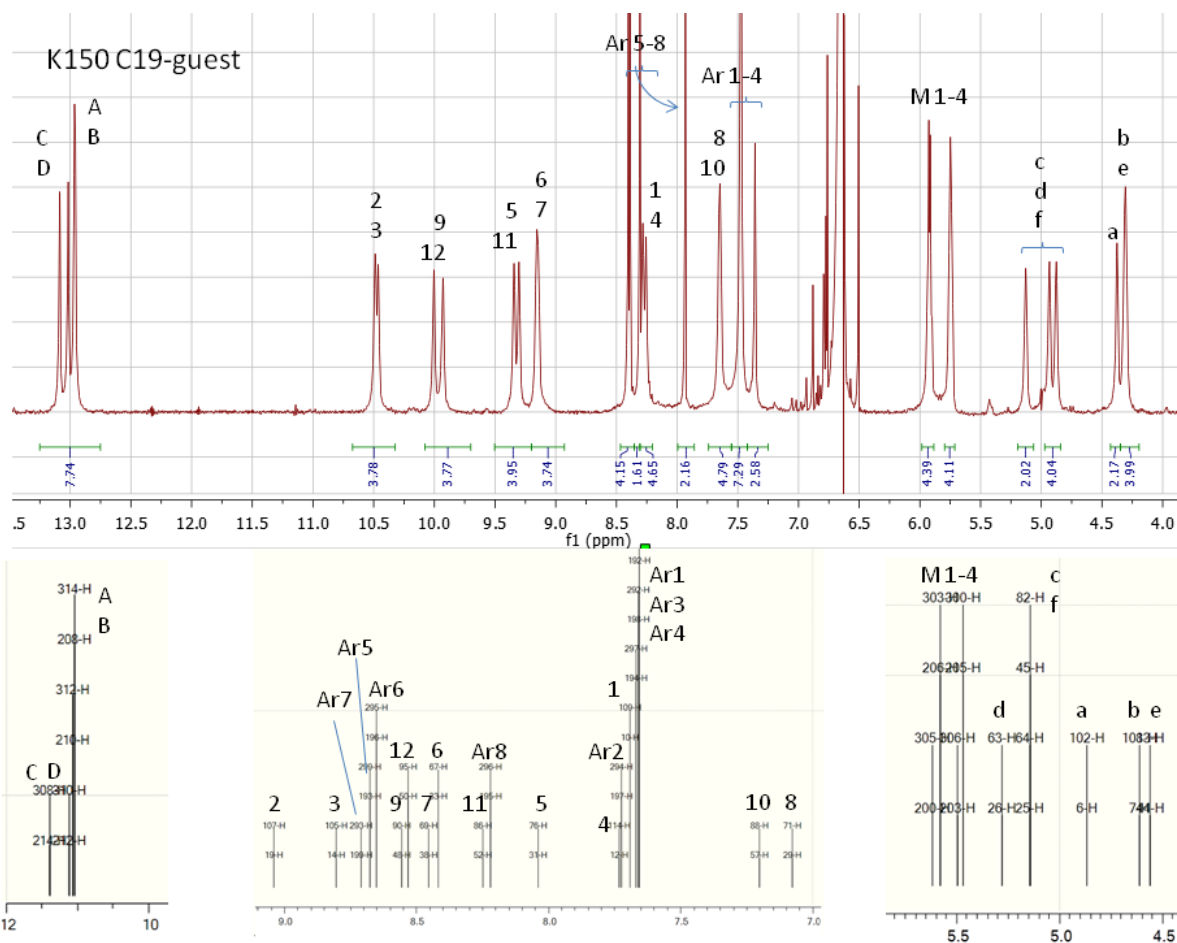

**Fig. SI 21:** Comparison of the observed NMR spectrum for assembly III encapsulating *n*-nonadecane (top) and the calculated NMR spectrum (bottom; B3LYP/6-31G\*, for raw data see appendix-txt-file). To limit the degrees of freedom of the assembly all alkyl feet on cavitaand **1** and on the propanediurea-units **3** had to be removed for the calculation. In addition the calculation was performed on the empty capsule (no guest present) in vacuum (no mesitylene solvent). Therefore the calculated absolute values of the resonances differ significantly from the observed ones. Nevertheless the relative orders of the imide-peaks (A-D), NH-peaks (1-12) as well as the propanediurea-bridgehead-proton signals (a-f) match well. Also the appearance and relative order of two sets of aromatic signals (Ar 5-8 and Ar 1-4) is predicted correctly by the calculation.

## Shape selective encapsulation studies

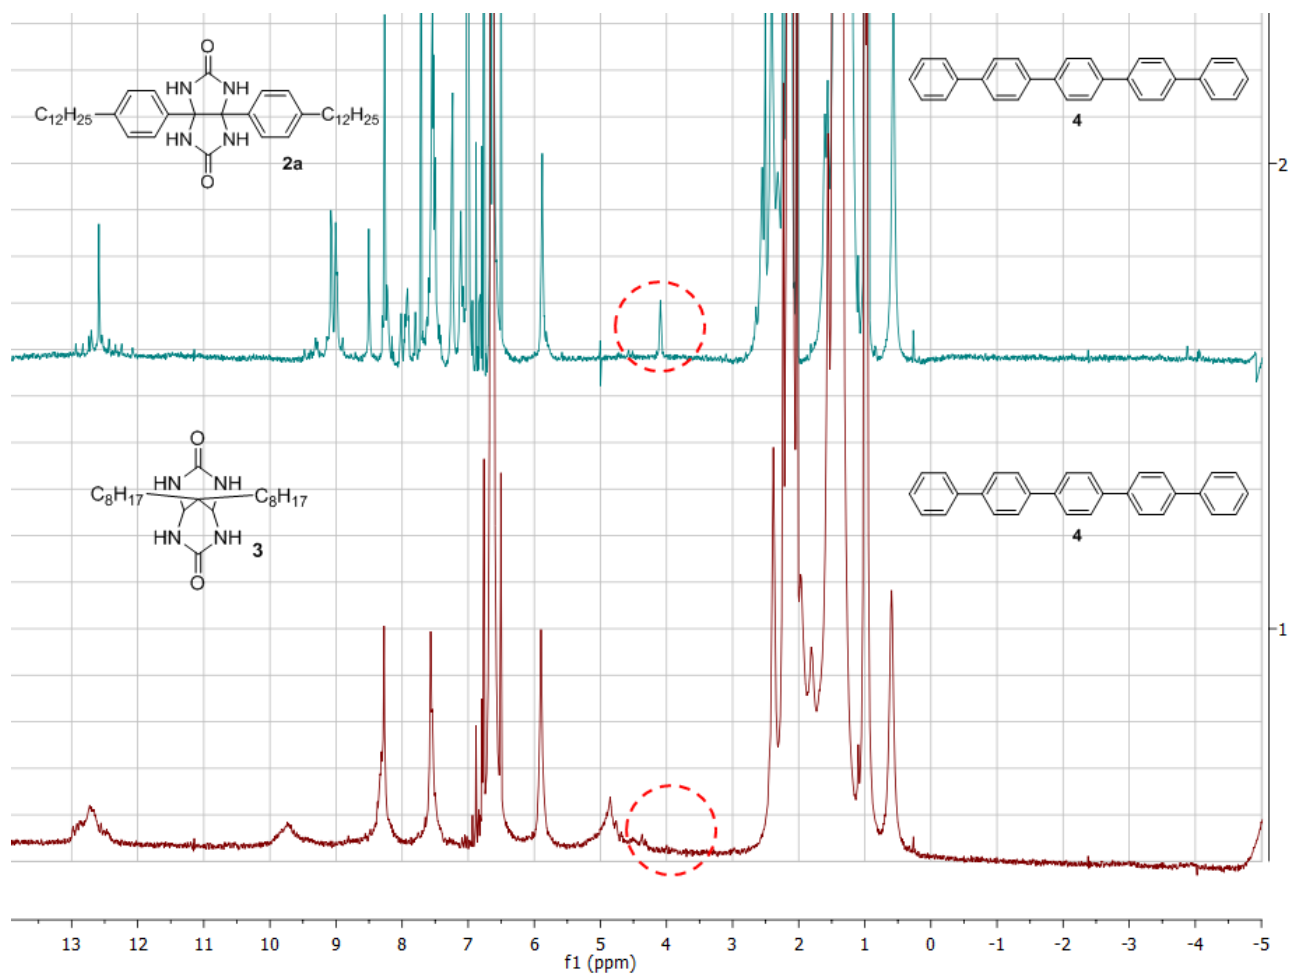

**Fig. SI 22:** The rigid rectilinear *p*-pentaphenyl (**4**) was accepted in the known doubly extended capsule formed by glycoluril **2a**, but it was rejected by capsule III assembled from propanediurea **3** apparently due to the insurmountable shape incompatibilities. The observed guest peak at ca. 4.0 ppm is indicative of the encapsulation of the aromatic guest.<sup>5</sup>

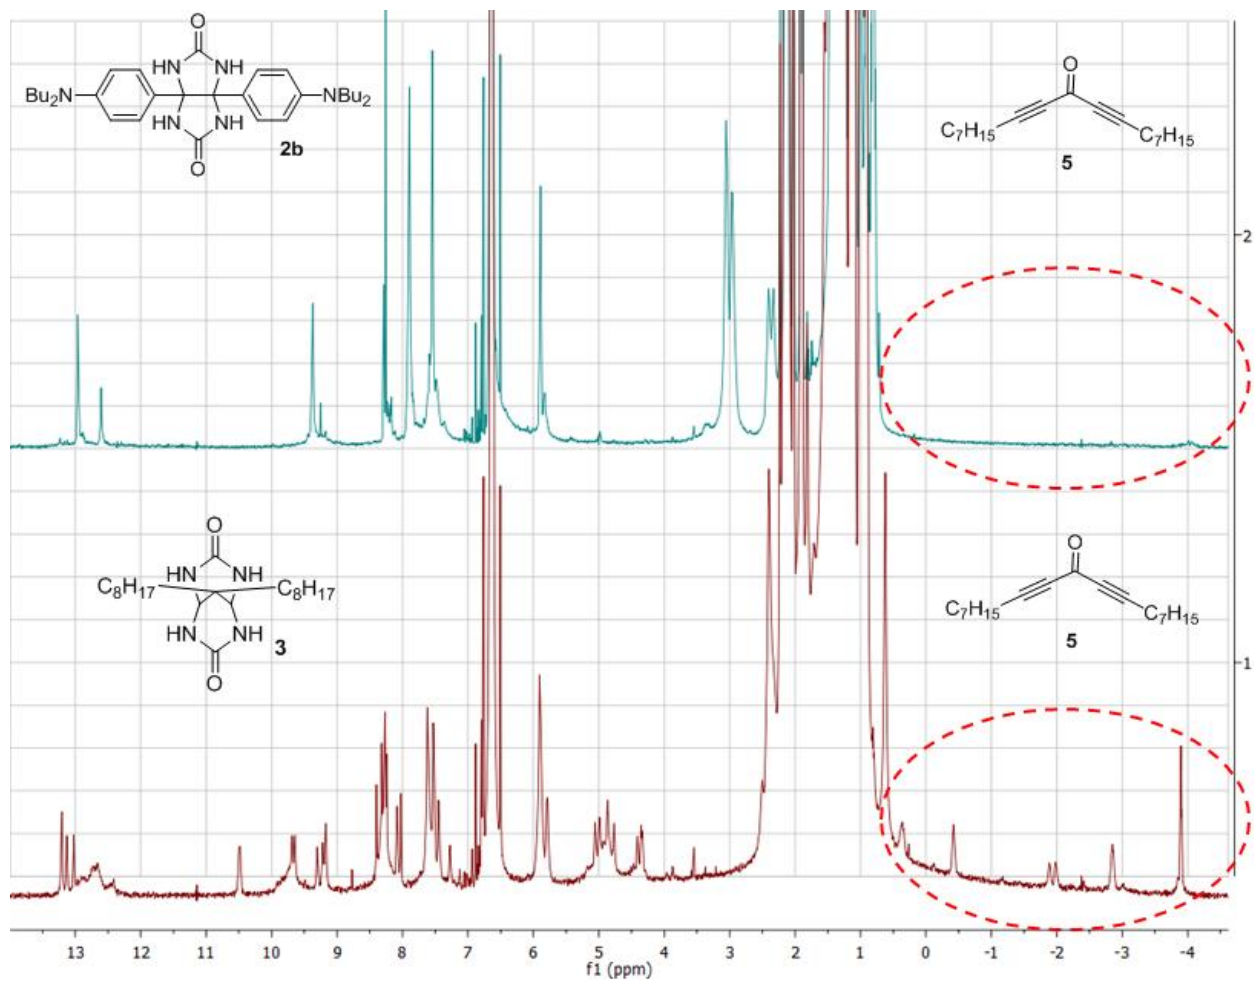

**Fig. SI 23:** The bent ketone-guest **5** on the other hand was encapsulated in the congruent host **III** formed by propanediurea **3** but not in the linear capsule **1.2<sub>3</sub>.1** formed by glycoluril **2b**.

## NMR spectra of encapsulated *n*-docosane (*n*-C<sub>22</sub>H<sub>46</sub>) in host IV

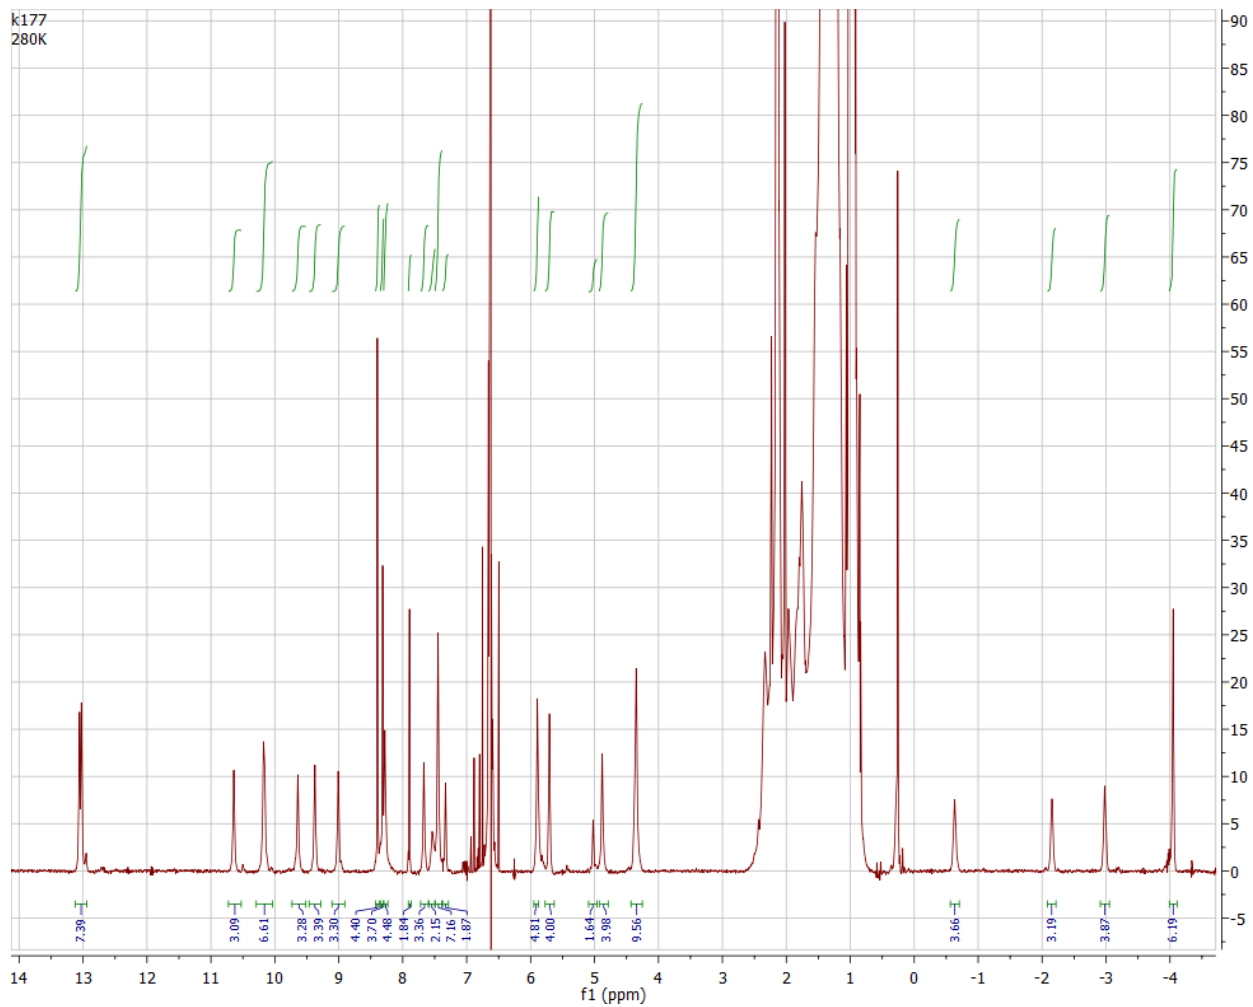

Fig. SI 24: Integrated 1H-NMR spectra of encapsulated *n*-docosane (*n*-C<sub>22</sub>H<sub>46</sub>) in host IV

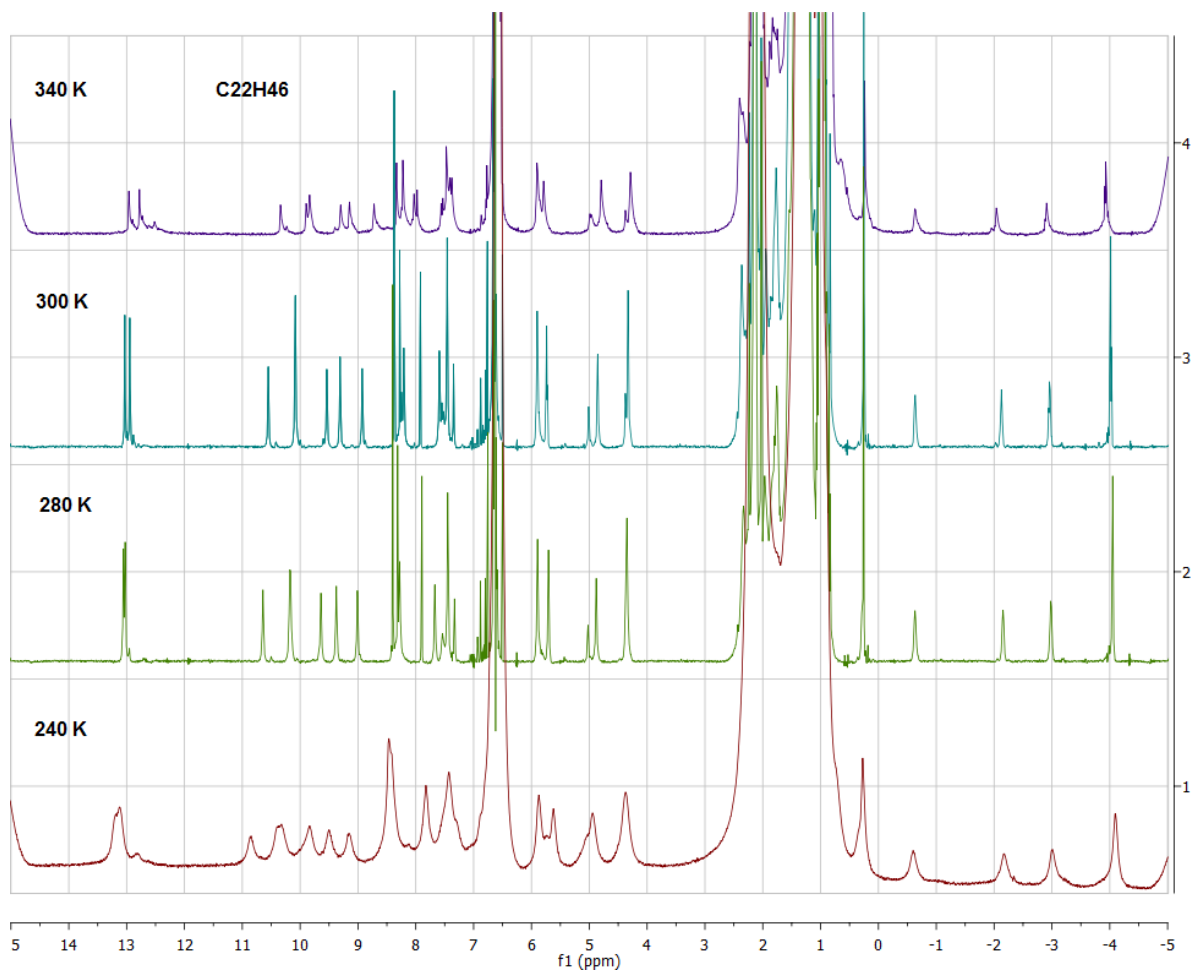

**Fig. SI 25:**  $^1\text{H}$ -NMR of assembly **IV** with encapsulated *n*-docosane at 240 – 340 K. No diastereotopic  $\text{CH}_2$ -guest signals are displayed.

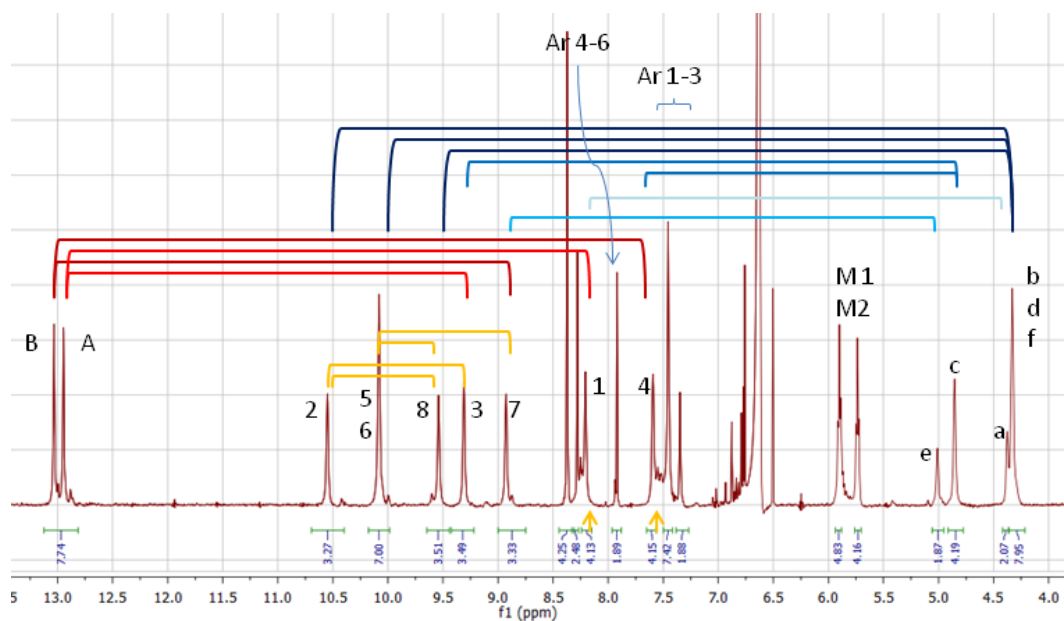

**Fig. SI 26:** Observed NOE-signals in assembly **IV (1.3'4.34.1)** with *n*-docosane as guest, recorded at 300 K (cf. Fig. SI 28).

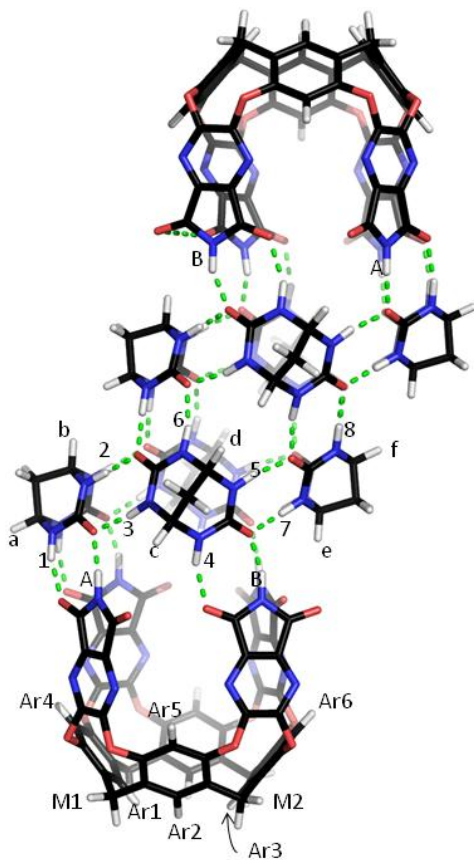

**Fig. SI 27:** Model of assembly **IV (1.3'4.34.1)**-



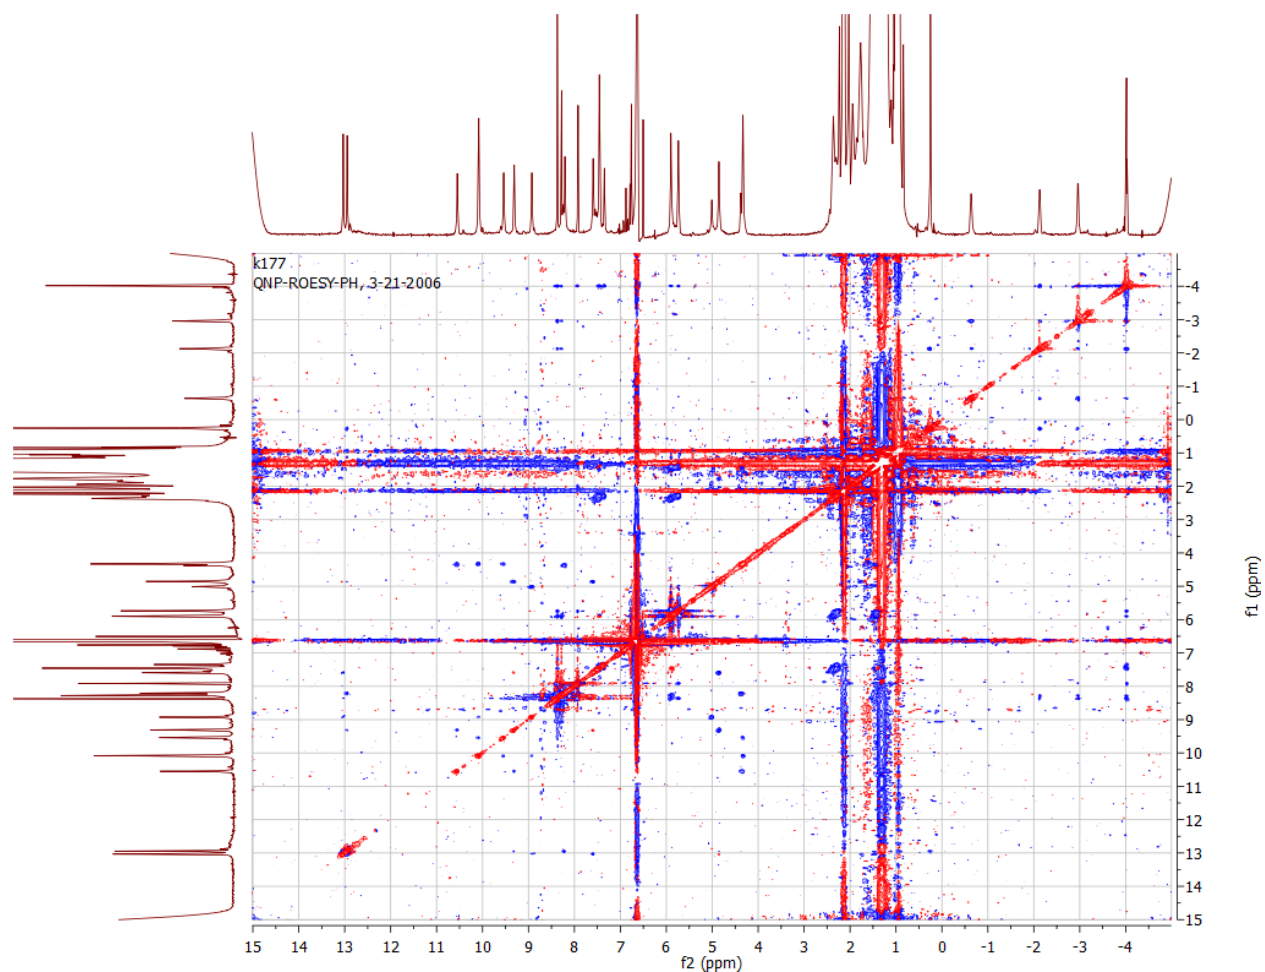

**Fig. SI 28:** ROESY spectrum of the assembly **IV** with encapsulated *n*-docosane. The observed NOEs were transferred to Fig. SI 26.

## References

- (1) Ajami, D.; Iwasawa, T.; Rebek, J. *Proc. Natl. Acad. Sci. U. S. A.* **2006**, *103*, 8934.
- (2) De Haan, T. *Recl. Trav. Ch. Pays-Ba.* **1908**, *27*, 162.
- (3) Jansen, R. J., PhD-thesis: Molecular clips based on propanediurea : synthesis and physical properties; University of Nijmegen, 2002.
- (4) Eisler, S.; Chahal, N.; McDonald, R.; Tykwinski, R. R. *Chem.–Eur. J.* **2003**, *9*, 2542.
- (5) Rebek, J.; Ajami, D. *J. Org. Chem.* **2009**, *74*, 6584.

**raw data (B3LYP/6-31G\*) for the calculated NMR spectrum**

b3lyp/6-31g\*

Calculating GIAO nuclear magnetic shielding tensors.

SCF GIAO Magnetic shielding tensor (ppm):

|    |   |              |          |              |          |     |          |
|----|---|--------------|----------|--------------|----------|-----|----------|
| 1  | H | Isotropic =  | 30.0748  | Anisotropy = | 8.3429   |     |          |
|    |   | XX=          | 27.4798  | YX=          | 0.4544   | ZX= | 1.3882   |
|    |   | XY=          | 0.2179   | YY=          | 27.5810  | ZY= | 0.2688   |
|    |   | XZ=          | 2.5127   | YZ=          | 0.0355   | ZZ= | 35.1636  |
|    |   | Eigenvalues: | 26.8892  | 27.6985      | 35.6367  |     |          |
| 2  | C | Isotropic =  | 161.6254 | Anisotropy = | 26.7314  |     |          |
|    |   | XX=          | 167.6179 | YX=          | -1.6056  | ZX= | -11.1907 |
|    |   | XY=          | -1.8055  | YY=          | 150.3101 | ZY= | 4.5296   |
|    |   | XZ=          | -11.8891 | YZ=          | 4.1119   | ZZ= | 166.9483 |
|    |   | Eigenvalues: | 149.1517 | 156.2783     | 179.4464 |     |          |
| 3  | C | Isotropic =  | 131.3838 | Anisotropy = | 19.4443  |     |          |
|    |   | XX=          | 140.6856 | YX=          | -9.1312  | ZX= | -1.4960  |
|    |   | XY=          | -4.0368  | YY=          | 111.3235 | ZY= | 3.0451   |
|    |   | XZ=          | -2.9361  | YZ=          | -2.4642  | ZZ= | 142.1422 |
|    |   | Eigenvalues: | 109.9137 | 139.8909     | 144.3466 |     |          |
| 4  | C | Isotropic =  | 132.1854 | Anisotropy = | 18.9389  |     |          |
|    |   | XX=          | 142.8616 | YX=          | -2.6494  | ZX= | -1.2343  |
|    |   | XY=          | -8.3305  | YY=          | 109.9078 | ZY= | -1.0705  |
|    |   | XZ=          | -0.1738  | YZ=          | 4.8462   | ZZ= | 143.7868 |
|    |   | Eigenvalues: | 108.9293 | 142.8156     | 144.8114 |     |          |
| 5  | H | Isotropic =  | 30.0470  | Anisotropy = | 8.2669   |     |          |
|    |   | XX=          | 34.9357  | YX=          | -1.0388  | ZX= | 2.5160   |
|    |   | XY=          | -1.1038  | YY=          | 27.8475  | ZY= | -0.2197  |
|    |   | XZ=          | 1.4254   | YZ=          | 0.2155   | ZZ= | 27.3578  |
|    |   | Eigenvalues: | 26.8063  | 27.7764      | 35.5582  |     |          |
| 6  | H | Isotropic =  | 27.7303  | Anisotropy = | 7.9720   |     |          |
|    |   | XX=          | 27.6378  | YX=          | 3.5524   | ZX= | 1.5119   |
|    |   | XY=          | 3.0301   | YY=          | 29.1539  | ZY= | 2.2469   |
|    |   | XZ=          | 1.6177   | YZ=          | 2.6866   | ZZ= | 26.3993  |
|    |   | Eigenvalues: | 24.7819  | 25.3641      | 33.0449  |     |          |
| 7  | H | Isotropic =  | 27.9865  | Anisotropy = | 7.4520   |     |          |
|    |   | XX=          | 25.5037  | YX=          | -0.5375  | ZX= | 0.5394   |
|    |   | XY=          | -0.5487  | YY=          | 32.3475  | ZY= | -1.8917  |
|    |   | XZ=          | 0.4296   | YZ=          | -1.9706  | ZZ= | 26.1084  |
|    |   | Eigenvalues: | 25.1814  | 25.8237      | 32.9545  |     |          |
| 8  | N | Isotropic =  | 145.6124 | Anisotropy = | 61.7987  |     |          |
|    |   | XX=          | 170.5029 | YX=          | -35.9949 | ZX= | -4.6342  |
|    |   | XY=          | 1.2949   | YY=          | 151.7612 | ZY= | -27.0725 |
|    |   | XZ=          | -6.4310  | YZ=          | -53.0357 | ZZ= | 114.5730 |
|    |   | Eigenvalues: | 86.6288  | 163.3968     | 186.8115 |     |          |
| 9  | N | Isotropic =  | 147.6027 | Anisotropy = | 54.2502  |     |          |
|    |   | XX=          | 176.6182 | YX=          | 23.6295  | ZX= | 2.0252   |
|    |   | XY=          | -9.8162  | YY=          | 144.1774 | ZY= | 27.7715  |
|    |   | XZ=          | 5.4358   | YZ=          | 53.7713  | ZZ= | 122.0125 |
|    |   | Eigenvalues: | 90.8263  | 168.2123     | 183.7695 |     |          |
| 10 | H | Isotropic =  | 24.9050  | Anisotropy = | 15.0771  |     |          |
|    |   | XX=          | 15.6856  | YX=          | 0.9699   | ZX= | -0.8185  |
|    |   | XY=          | -0.5932  | YY=          | 31.4498  | ZY= | -6.0364  |
|    |   | XZ=          | -0.2350  | YZ=          | -4.1127  | ZZ= | 27.5796  |
|    |   | Eigenvalues: | 15.6622  | 24.0964      | 34.9564  |     |          |

11 N Isotropic = 147.0721 Anisotropy = 55.1357  
XX= 139.6579 YX= 55.5659 ZX= -6.6536  
XY= 29.4925 YY= 129.2329 ZY= -2.0842  
XZ= 2.1026 YZ= 31.3984 ZZ= 172.3256  
Eigenvalues: 89.6949 167.6923 183.8293

12 H Isotropic = 24.8645 Anisotropy = 15.0363  
XX= 25.6543 YX= -2.9743 ZX= -0.0895  
XY= -4.9486 YY= 32.7409 ZY= -3.7293  
XZ= -0.0642 YZ= -2.1270 ZZ= 16.1985  
Eigenvalues: 15.6346 24.0702 34.8887

13 N Isotropic = 145.3835 Anisotropy = 60.8235  
XX= 99.7326 YX= -43.8771 ZX= 3.8359  
XY= -18.4659 YY= 159.9294 ZY= 5.3242  
XZ= -6.7007 YZ= -29.9201 ZZ= 176.4886  
Eigenvalues: 86.0790 164.1390 185.9325

14 H Isotropic = 23.7926 Anisotropy = 19.4566  
XX= 29.3498 YX= 7.0637 ZX= -1.0472  
XY= 7.6758 YY= 29.2534 ZY= -0.1971  
XZ= -2.2480 YZ= -0.7016 ZZ= 12.7747  
Eigenvalues: 12.6069 22.0073 36.7637

15 C Isotropic = 41.0695 Anisotropy = 103.9982  
XX= 23.8298 YX= -8.7727 ZX= 7.7592  
XY= -9.9515 YY= -10.9275 ZY= -0.1452  
XZ= -3.8928 YZ= 5.5785 ZZ= 110.3062  
Eigenvalues: -13.3669 26.1738 110.4016

16 C Isotropic = 41.2857 Anisotropy = 103.2870  
XX= 106.1610 YX= -19.9908 ZX= -4.0868  
XY= -23.4398 YY= -9.9717 ZY= -1.5229  
XZ= 7.6698 YZ= -2.6168 ZZ= 27.6679  
Eigenvalues: -13.9703 27.6838 110.1437

17 O Isotropic = 97.2042 Anisotropy = 281.6395  
XX= 272.8841 YX= -49.2852 ZX= -21.7183  
XY= -62.6773 YY= 21.9073 ZY= 6.5937  
XZ= 36.1454 YZ= -3.8815 ZZ= -3.1786  
Eigenvalues: -3.9131 10.5620 284.9639

18 O Isotropic = 99.6019 Anisotropy = 276.0413  
XX= 3.3594 YX= 4.7758 ZX= 29.4179  
XY= 3.2553 YY= 11.8718 ZY= -13.5468  
XZ= -22.5823 YZ= 9.6452 ZZ= 283.5744  
Eigenvalues: 1.7102 13.4660 283.6294

19 H Isotropic = 23.5569 Anisotropy = 20.3394  
XX= 12.7325 YX= 2.5219 ZX= -0.6255  
XY= 3.2700 YY= 32.0233 ZY= 7.7514  
XZ= 0.2783 YZ= 6.8768 ZZ= 25.9150  
Eigenvalues: 12.1708 21.3834 37.1166

20 H Isotropic = 30.0175 Anisotropy = 7.8328  
XX= 34.4342 YX= -1.7175 ZX= 2.1049  
XY= -1.8306 YY= 28.6098 ZY= -0.3592  
XZ= 1.0115 YZ= -0.3069 ZZ= 27.0084  
Eigenvalues: 26.6943 28.1188 35.2393

21 C Isotropic = 161.8933 Anisotropy = 32.0137  
XX= 167.0350 YX= -4.1537 ZX= -13.9315  
XY= -4.6134 YY= 149.2672 ZY= 2.6995  
XZ= -14.6083 YZ= 2.5791 ZZ= 169.3777

Eigenvalues: 148.2020 154.2421 183.2358  
 22 C Isotropic = 132.5075 Anisotropy = 19.2598  
 XX= 142.1375 YX= -10.8208 ZX= -1.1942  
 XY= -6.3126 YY= 111.4855 ZY= -0.6553  
 XZ= -2.5763 YZ= -5.5370 ZZ= 143.8996  
 Eigenvalues: 108.9090 143.2662 145.3474  
 23 C Isotropic = 133.4167 Anisotropy = 20.2245  
 XX= 144.3014 YX= -4.0864 ZX= -1.8817  
 XY= -8.8243 YY= 111.0399 ZY= -1.4021  
 XZ= -1.0888 YZ= 3.5371 ZZ= 144.9087  
 Eigenvalues: 109.8138 143.5365 146.8997  
 24 H Isotropic = 30.0891 Anisotropy = 7.3960  
 XX= 27.1362 YX= -0.2958 ZX= 0.9810  
 XY= -0.2627 YY= 28.5357 ZY= -0.2621  
 XZ= 2.5144 YZ= -0.5913 ZZ= 34.5954  
 Eigenvalues: 26.7289 28.5187 35.0198  
 25 H Isotropic = 27.4527 Anisotropy = 7.9851  
 XX= 26.3591 YX= 3.5183 ZX= 0.7256  
 XY= 2.6159 YY= 30.0388 ZY= 2.2878  
 XZ= 1.1509 YZ= 2.6433 ZZ= 25.9602  
 Eigenvalues: 24.3815 25.2005 32.7761  
 26 H Isotropic = 27.3174 Anisotropy = 9.4011  
 XX= 24.4728 YX= -2.1358 ZX= 0.0416  
 XY= -1.4029 YY= 32.2374 ZY= -2.5004  
 XZ= -0.0305 YZ= -3.2854 ZZ= 25.2421  
 Eigenvalues: 23.5992 24.7683 33.5849  
 27 N Isotropic = 146.1511 Anisotropy = 63.0311  
 XX= 101.6927 YX= -43.7312 ZX= 5.9608  
 XY= -19.5672 YY= 161.2907 ZY= 5.3595  
 XZ= -1.9275 YZ= -31.7114 ZZ= 175.4698  
 Eigenvalues: 87.8887 162.3927 188.1718  
 28 N Isotropic = 150.4020 Anisotropy = 64.0132  
 XX= 149.1241 YX= 54.9299 ZX= 7.3569  
 XY= 29.4785 YY= 127.5493 ZY= -12.4526  
 XZ= 14.5846 YZ= 31.1446 ZZ= 174.5326  
 Eigenvalues: 94.7702 163.3583 193.0775  
 29 H Isotropic = 25.5201 Anisotropy = 15.7879  
 XX= 24.9475 YX= -1.0491 ZX= -3.3615  
 XY= -3.0146 YY= 33.0402 ZY= 5.0033  
 XZ= -4.4007 YZ= 6.6038 ZZ= 18.5725  
 Eigenvalues: 15.5287 24.9862 36.0453  
 30 N Isotropic = 148.4378 Anisotropy = 56.3780  
 XX= 179.1578 YX= 23.1504 ZX= 7.1402  
 XY= -13.6515 YY= 142.8781 ZY= 28.1270  
 XZ= 11.2285 YZ= 48.8596 ZZ= 123.2774  
 Eigenvalues: 93.1350 166.1552 186.0231  
 31 H Isotropic = 24.5577 Anisotropy = 19.1074  
 XX= 14.6404 YX= 5.4783 ZX= -3.1923  
 XY= 4.0225 YY= 31.7239 ZY= -6.2787  
 XZ= -2.1293 YZ= -5.9129 ZZ= 27.3089  
 Eigenvalues: 13.3157 23.0614 37.2960  
 32 N Isotropic = 147.7825 Anisotropy = 62.4105  
 XX= 170.6461 YX= -37.8439 ZX= -5.1870  
 XY= 1.3306 YY= 154.9392 ZY= -27.8043

|    |              |             |          |              |          |          |
|----|--------------|-------------|----------|--------------|----------|----------|
|    | XZ=          | -5.1293     | YZ=      | -50.6606     | ZZ=      | 117.7622 |
|    | Eigenvalues: | 90.3958     | 163.5623 | 189.3895     |          |          |
| 33 | H            | Isotropic = | 24.1798  | Anisotropy = | 19.5897  |          |
|    | XX=          | 13.0730     | YX=      | 0.1394       | ZX=      | -0.8620  |
|    | XY=          | 1.4874      | YY=      | 32.2987      | ZY=      | 7.6118   |
|    | XZ=          | 0.3279      | YZ=      | 6.4738       | ZZ=      | 27.1678  |
|    | Eigenvalues: | 13.0112     | 22.2886  | 37.2396      |          |          |
| 34 | C            | Isotropic = | 41.8601  | Anisotropy = | 103.7644 |          |
|    | XX=          | 106.0749    | YX=      | -22.9937     | ZX=      | -1.0451  |
|    | XY=          | -24.5279    | YY=      | -7.3748      | ZY=      | -1.9804  |
|    | XZ=          | 7.9234      | YZ=      | -3.9495      | ZZ=      | 26.8803  |
|    | Eigenvalues: | -12.2776    | 26.8216  | 111.0364     |          |          |
| 35 | C            | Isotropic = | 42.9548  | Anisotropy = | 102.6525 |          |
|    | XX=          | 24.8030     | YX=      | -10.5722     | ZX=      | 13.1012  |
|    | XY=          | -9.5225     | YY=      | -5.3937      | ZY=      | -8.6892  |
|    | XZ=          | 5.0618      | YZ=      | -10.5164     | ZZ=      | 109.4551 |
|    | Eigenvalues: | -8.8069     | 26.2815  | 111.3898     |          |          |
| 36 | O            | Isotropic = | 113.6744 | Anisotropy = | 258.7396 |          |
|    | XX=          | 27.1159     | YX=      | -0.9709      | ZX=      | 54.2319  |
|    | XY=          | 3.0523      | YY=      | 29.4976      | ZY=      | -19.0642 |
|    | XZ=          | -18.4851    | YZ=      | -4.2865      | ZZ=      | 284.4097 |
|    | Eigenvalues: | 25.0223     | 29.8334  | 286.1674     |          |          |
| 37 | O            | Isotropic = | 111.5501 | Anisotropy = | 274.3942 |          |
|    | XX=          | 283.2734    | YX=      | -50.9530     | ZX=      | -30.1504 |
|    | XY=          | -56.9572    | YY=      | 33.1804      | ZY=      | 4.8874   |
|    | XZ=          | 38.0774     | YZ=      | -7.5854      | ZZ=      | 18.1966  |
|    | Eigenvalues: | 18.0662     | 22.1046  | 294.4796     |          |          |
| 38 | H            | Isotropic = | 24.1429  | Anisotropy = | 18.7700  |          |
|    | XX=          | 30.1100     | YX=      | 6.3170       | ZX=      | -1.9018  |
|    | XY=          | 7.1921      | YY=      | 28.7346      | ZY=      | -1.3657  |
|    | XZ=          | -3.2430     | YZ=      | -2.4911      | ZZ=      | 13.5839  |
|    | Eigenvalues: | 13.1308     | 22.6416  | 36.6562      |          |          |
| 39 | H            | Isotropic = | 30.1638  | Anisotropy = | 8.0576   |          |
|    | XX=          | 27.2900     | YX=      | -0.0707      | ZX=      | -0.9025  |
|    | XY=          | -0.1916     | YY=      | 27.9043      | ZY=      | 0.0976   |
|    | XZ=          | -1.8458     | YZ=      | 0.3932       | ZZ=      | 35.2972  |
|    | Eigenvalues: | 27.0513     | 27.9046  | 35.5355      |          |          |
| 40 | C            | Isotropic = | 161.3276 | Anisotropy = | 30.9131  |          |
|    | XX=          | 168.8867    | YX=      | -4.3288      | ZX=      | 13.4103  |
|    | XY=          | -4.2472     | YY=      | 148.8359     | ZY=      | -3.4193  |
|    | XZ=          | 13.5190     | YZ=      | -2.7672      | ZZ=      | 166.2602 |
|    | Eigenvalues: | 147.9461    | 154.1003 | 181.9363     |          |          |
| 41 | C            | Isotropic = | 132.4058 | Anisotropy = | 18.1411  |          |
|    | XX=          | 141.4883    | YX=      | -10.2514     | ZX=      | 0.6201   |
|    | XY=          | -5.1630     | YY=      | 111.8317     | ZY=      | -1.8430  |
|    | XZ=          | 1.4670      | YZ=      | 3.6530       | ZZ=      | 143.8975 |
|    | Eigenvalues: | 109.9110    | 142.8066 | 144.4999     |          |          |
| 42 | C            | Isotropic = | 132.7569 | Anisotropy = | 19.5506  |          |
|    | XX=          | 144.0216    | YX=      | -2.3851      | ZX=      | 1.6931   |
|    | XY=          | -7.4887     | YY=      | 109.6262     | ZY=      | 1.5726   |
|    | XZ=          | 0.2874      | YZ=      | -3.4568      | ZZ=      | 144.6230 |
|    | Eigenvalues: | 108.9139    | 143.5662 | 145.7906     |          |          |
| 43 | H            | Isotropic = | 30.2171  | Anisotropy = | 7.7940   |          |
|    | XX=          | 34.4485     | YX=      | -1.6324      | ZX=      | -2.7480  |

|    |              |             |          |              |          |          |
|----|--------------|-------------|----------|--------------|----------|----------|
|    | XY=          | -1.6933     | YY=      | 28.4309      | ZY=      | 0.3013   |
|    | XZ=          | -1.3324     | YZ=      | 0.0628       | ZZ=      | 27.7717  |
|    | Eigenvalues: | 27.1194     | 28.1188  | 35.4131      |          |          |
| 44 | H            | Isotropic = | 28.0374  | Anisotropy = | 7.7987   |          |
|    | XX=          | 27.0269     | YX=      | 3.0786       | ZX=      | -1.2190  |
|    | XY=          | 2.7080      | YY=      | 30.8690      | ZY=      | -1.9218  |
|    | XZ=          | -1.1882     | YZ=      | -2.2177      | ZZ=      | 26.2164  |
|    | Eigenvalues: | 25.3516     | 25.5241  | 33.2366      |          |          |
| 45 | H            | Isotropic = | 27.4554  | Anisotropy = | 8.0185   |          |
|    | XX=          | 25.1677     | YX=      | -1.5609      | ZX=      | -0.0974  |
|    | XY=          | -1.0870     | YY=      | 31.9507      | ZY=      | 1.7747   |
|    | XZ=          | 0.3585      | YZ=      | 2.6007       | ZZ=      | 25.2478  |
|    | Eigenvalues: | 24.2526     | 25.3126  | 32.8011      |          |          |
| 46 | N            | Isotropic = | 150.0519 | Anisotropy = | 64.2426  |          |
|    | XX=          | 168.6279    | YX=      | -36.3554     | ZX=      | -1.9954  |
|    | XY=          | 6.0465      | YY=      | 152.9037     | ZY=      | 30.5325  |
|    | XZ=          | 1.2795      | YZ=      | 57.5663      | ZZ=      | 128.6239 |
|    | Eigenvalues: | 93.9878     | 163.2875 | 192.8802     |          |          |
| 47 | N            | Isotropic = | 146.5642 | Anisotropy = | 59.6109  |          |
|    | XX=          | 177.0722    | YX=      | 21.4138      | ZX=      | -11.6747 |
|    | XY=          | -14.0672    | YY=      | 143.3027     | ZY=      | -26.6961 |
|    | XZ=          | -15.1863    | YZ=      | -51.4106     | ZZ=      | 119.3175 |
|    | Eigenvalues: | 89.5936     | 163.7942 | 186.3047     |          |          |
| 48 | H            | Isotropic = | 24.0409  | Anisotropy = | 18.9016  |          |
|    | XX=          | 14.4016     | YX=      | 4.9811       | ZX=      | 3.8886   |
|    | XY=          | 3.8148      | YY=      | 31.1912      | ZY=      | 6.2296   |
|    | XZ=          | 2.9368      | YZ=      | 5.6760       | ZZ=      | 26.5299  |
|    | Eigenvalues: | 13.0019     | 22.4788  | 36.6420      |          |          |
| 49 | N            | Isotropic = | 148.0340 | Anisotropy = | 59.3702  |          |
|    | XX=          | 136.8360    | YX=      | 51.6604      | ZX=      | -0.1503  |
|    | XY=          | 30.7585     | YY=      | 131.1223     | ZY=      | 5.0572   |
|    | XZ=          | -6.2253     | YZ=      | -32.1169     | ZZ=      | 176.1437 |
|    | Eigenvalues: | 91.9496     | 164.5383 | 187.6141     |          |          |
| 50 | H            | Isotropic = | 24.0655  | Anisotropy = | 19.5909  |          |
|    | XX=          | 24.2403     | YX=      | -4.6989      | ZX=      | 0.6655   |
|    | XY=          | -5.4318     | YY=      | 35.0574      | ZY=      | -0.3636  |
|    | XZ=          | 1.4875      | YZ=      | -1.5264      | ZZ=      | 12.8988  |
|    | Eigenvalues: | 12.7866     | 22.2838  | 37.1261      |          |          |
| 51 | N            | Isotropic = | 148.1389 | Anisotropy = | 57.5130  |          |
|    | XX=          | 106.3543    | YX=      | -40.1982     | ZX=      | -0.3267  |
|    | XY=          | -19.7177    | YY=      | 162.4447     | ZY=      | -5.1567  |
|    | XZ=          | 7.6037      | YZ=      | 31.3135      | ZZ=      | 175.6176 |
|    | Eigenvalues: | 92.4709     | 165.4649 | 186.4808     |          |          |
| 52 | H            | Isotropic = | 24.3485  | Anisotropy = | 19.1149  |          |
|    | XX=          | 30.2700     | YX=      | 6.7306       | ZX=      | 0.7342   |
|    | XY=          | 7.3555      | YY=      | 29.6452      | ZY=      | -0.0184  |
|    | XZ=          | 2.0109      | YZ=      | 1.2570       | ZZ=      | 13.1303  |
|    | Eigenvalues: | 13.0209     | 22.9329  | 37.0918      |          |          |
| 53 | C            | Isotropic = | 42.1137  | Anisotropy = | 103.1256 |          |
|    | XX=          | 27.2546     | YX=      | -8.7764      | ZX=      | -5.5474  |
|    | XY=          | -8.0180     | YY=      | -11.7190     | ZY=      | 3.3650   |
|    | XZ=          | 4.5609      | YZ=      | 1.7449       | ZZ=      | 110.8054 |
|    | Eigenvalues: | -13.4977    | 28.9747  | 110.8641     |          |          |
| 54 | C            | Isotropic = | 43.3399  | Anisotropy = | 102.2552 |          |

|    |              |             |          |              |          |          |  |
|----|--------------|-------------|----------|--------------|----------|----------|--|
|    | XX=          | 106.7831    | YX=      | -16.1249     | ZX=      | -8.0450  |  |
|    | XY=          | -20.6273    | YY=      | -7.0340      | ZY=      | 0.8124   |  |
|    | XZ=          | -16.2167    | YZ=      | 2.0404       | ZZ=      | 30.2708  |  |
|    | Eigenvalues: | -9.9332     | 28.4430  | 111.5101     |          |          |  |
| 55 | O            | Isotropic = | 108.8461 | Anisotropy = | 268.2230 |          |  |
|    | XX=          | 275.1916    | YX=      | -46.9501     | ZX=      | 8.3839   |  |
|    | XY=          | -50.8543    | YY=      | 33.0914      | ZY=      | 1.9736   |  |
|    | XZ=          | -63.2662    | YZ=      | 11.9248      | ZZ=      | 18.2552  |  |
|    | Eigenvalues: | 15.0005     | 23.8764  | 287.6614     |          |          |  |
| 56 | O            | Isotropic = | 106.9825 | Anisotropy = | 283.5864 |          |  |
|    | XX=          | 9.0726      | YX=      | 1.0911       | ZX=      | -28.1246 |  |
|    | XY=          | 1.8298      | YY=      | 15.9725      | ZY=      | 10.8830  |  |
|    | XZ=          | 36.6075     | YZ=      | -1.7566      | ZZ=      | 295.9023 |  |
|    | Eigenvalues: | 8.7390      | 16.1684  | 296.0401     |          |          |  |
| 57 | H            | Isotropic = | 25.3957  | Anisotropy = | 15.7407  |          |  |
|    | XX=          | 17.2614     | YX=      | -2.3860      | ZX=      | 4.8472   |  |
|    | XY=          | -1.1782     | YY=      | 33.0652      | ZY=      | -5.6439  |  |
|    | XZ=          | 3.9775      | YZ=      | -3.2774      | ZZ=      | 25.8605  |  |
|    | Eigenvalues: | 15.3997     | 24.8980  | 35.8895      |          |          |  |
| 58 | H            | Isotropic = | 30.0891  | Anisotropy = | 7.3960   |          |  |
|    | XX=          | 27.1362     | YX=      | -0.2958      | ZX=      | -0.9810  |  |
|    | XY=          | -0.2627     | YY=      | 28.5357      | ZY=      | 0.2621   |  |
|    | XZ=          | -2.5144     | YZ=      | 0.5913       | ZZ=      | 34.5954  |  |
|    | Eigenvalues: | 26.7289     | 28.5187  | 35.0198      |          |          |  |
| 59 | C            | Isotropic = | 161.8933 | Anisotropy = | 32.0137  |          |  |
|    | XX=          | 167.0350    | YX=      | -4.1537      | ZX=      | 13.9315  |  |
|    | XY=          | -4.6134     | YY=      | 149.2672     | ZY=      | -2.6995  |  |
|    | XZ=          | 14.6083     | YZ=      | -2.5791      | ZZ=      | 169.3777 |  |
|    | Eigenvalues: | 148.2020    | 154.2421 | 183.2358     |          |          |  |
| 60 | C            | Isotropic = | 133.4167 | Anisotropy = | 20.2245  |          |  |
|    | XX=          | 144.3014    | YX=      | -4.0864      | ZX=      | 1.8817   |  |
|    | XY=          | -8.8243     | YY=      | 111.0399     | ZY=      | 1.4021   |  |
|    | XZ=          | 1.0888      | YZ=      | -3.5371      | ZZ=      | 144.9087 |  |
|    | Eigenvalues: | 109.8138    | 143.5365 | 146.8997     |          |          |  |
| 61 | C            | Isotropic = | 132.5075 | Anisotropy = | 19.2598  |          |  |
|    | XX=          | 142.1375    | YX=      | -10.8208     | ZX=      | 1.1942   |  |
|    | XY=          | -6.3126     | YY=      | 111.4855     | ZY=      | 0.6553   |  |
|    | XZ=          | 2.5763      | YZ=      | 5.5370       | ZZ=      | 143.8996 |  |
|    | Eigenvalues: | 108.9090    | 143.2662 | 145.3474     |          |          |  |
| 62 | H            | Isotropic = | 30.0175  | Anisotropy = | 7.8328   |          |  |
|    | XX=          | 34.4342     | YX=      | -1.7175      | ZX=      | -2.1049  |  |
|    | XY=          | -1.8306     | YY=      | 28.6098      | ZY=      | 0.3592   |  |
|    | XZ=          | -1.0115     | YZ=      | 0.3069       | ZZ=      | 27.0084  |  |
|    | Eigenvalues: | 26.6943     | 28.1188  | 35.2393      |          |          |  |
| 63 | H            | Isotropic = | 27.3174  | Anisotropy = | 9.4011   |          |  |
|    | XX=          | 24.4728     | YX=      | -2.1358      | ZX=      | -0.0416  |  |
|    | XY=          | -1.4029     | YY=      | 32.2374      | ZY=      | 2.5004   |  |
|    | XZ=          | 0.0305      | YZ=      | 3.2854       | ZZ=      | 25.2421  |  |
|    | Eigenvalues: | 23.5992     | 24.7683  | 33.5849      |          |          |  |
| 64 | H            | Isotropic = | 27.4527  | Anisotropy = | 7.9851   |          |  |
|    | XX=          | 26.3591     | YX=      | 3.5183       | ZX=      | -0.7256  |  |
|    | XY=          | 2.6159      | YY=      | 30.0388      | ZY=      | -2.2878  |  |
|    | XZ=          | -1.1509     | YZ=      | -2.6433      | ZZ=      | 25.9602  |  |
|    | Eigenvalues: | 24.3815     | 25.2005  | 32.7761      |          |          |  |



65 N Isotropic = 148.4378 Anisotropy = 56.3780  
 XX= 179.1578 YX= 23.1504 ZX= -7.1402  
 XY= -13.6515 YY= 142.8781 ZY= -28.1270  
 XZ= -11.2285 YZ= -48.8596 ZZ= 123.2774  
 Eigenvalues: 93.1350 166.1552 186.0231

66 N Isotropic = 147.7825 Anisotropy = 62.4105  
 XX= 170.6461 YX= -37.8439 ZX= 5.1870  
 XY= 1.3306 YY= 154.9392 ZY= 27.8043  
 XZ= 5.1293 YZ= 50.6606 ZZ= 117.7622  
 Eigenvalues: 90.3958 163.5623 189.3895

67 H Isotropic = 24.1798 Anisotropy = 19.5897  
 XX= 13.0730 YX= 0.1394 ZX= 0.8620  
 XY= 1.4874 YY= 32.2987 ZY= -7.6118  
 XZ= -0.3279 YZ= -6.4738 ZZ= 27.1678  
 Eigenvalues: 13.0112 22.2886 37.2396

68 N Isotropic = 146.1511 Anisotropy = 63.0311  
 XX= 101.6927 YX= -43.7312 ZX= -5.9608  
 XY= -19.5672 YY= 161.2907 ZY= -5.3595  
 XZ= 1.9275 YZ= 31.7114 ZZ= 175.4698  
 Eigenvalues: 87.8887 162.3927 188.1718

69 H Isotropic = 24.1429 Anisotropy = 18.7700  
 XX= 30.1100 YX= 6.3170 ZX= 1.9018  
 XY= 7.1921 YY= 28.7346 ZY= 1.3657  
 XZ= 3.2430 YZ= 2.4911 ZZ= 13.5839  
 Eigenvalues: 13.1308 22.6416 36.6562

70 N Isotropic = 150.4020 Anisotropy = 64.0132  
 XX= 149.1241 YX= 54.9299 ZX= -7.3569  
 XY= 29.4785 YY= 127.5493 ZY= 12.4526  
 XZ= -14.5846 YZ= -31.1446 ZZ= 174.5326  
 Eigenvalues: 94.7702 163.3583 193.0775

71 H Isotropic = 25.5201 Anisotropy = 15.7879  
 XX= 24.9475 YX= -1.0491 ZX= 3.3615  
 XY= -3.0146 YY= 33.0402 ZY= -5.0033  
 XZ= 4.4007 YZ= -6.6038 ZZ= 18.5725  
 Eigenvalues: 15.5287 24.9862 36.0453

72 C Isotropic = 42.9548 Anisotropy = 102.6525  
 XX= 24.8030 YX= -10.5722 ZX= -13.1012  
 XY= -9.5225 YY= -5.3937 ZY= 8.6892  
 XZ= -5.0618 YZ= 10.5164 ZZ= 109.4551  
 Eigenvalues: -8.8069 26.2815 111.3898

73 C Isotropic = 41.8601 Anisotropy = 103.7644  
 XX= 106.0749 YX= -22.9938 ZX= 1.0451  
 XY= -24.5279 YY= -7.3748 ZY= 1.9804  
 XZ= -7.9234 YZ= 3.9495 ZZ= 26.8803  
 Eigenvalues: -12.2776 26.8216 111.0364

74 O Isotropic = 111.5501 Anisotropy = 274.3942  
 XX= 283.2734 YX= -50.9530 ZX= 30.1504  
 XY= -56.9572 YY= 33.1804 ZY= -4.8874  
 XZ= -38.0774 YZ= 7.5854 ZZ= 18.1966  
 Eigenvalues: 18.0662 22.1046 294.4796

75 O Isotropic = 113.6744 Anisotropy = 258.7396  
 XX= 27.1159 YX= -0.9709 ZX= -54.2319  
 XY= 3.0523 YY= 29.4976 ZY= 19.0642  
 XZ= 18.4851 YZ= 4.2865 ZZ= 284.4097

|    |              |             |          |              |          |
|----|--------------|-------------|----------|--------------|----------|
|    | Eigenvalues: | 25.0223     | 29.8334  | 286.1674     |          |
| 76 | H            | Isotropic = | 24.5577  | Anisotropy = | 19.1074  |
|    |              | XX=         | 14.6404  | YX=          | 5.4783   |
|    |              |             |          | ZX=          | 3.1923   |
|    |              | XY=         | 4.0225   | YY=          | 31.7239  |
|    |              |             |          | ZY=          | 6.2787   |
|    |              | XZ=         | 2.1293   | YZ=          | 5.9129   |
|    |              |             |          | ZZ=          | 27.3089  |
|    | Eigenvalues: | 13.3157     | 23.0614  | 37.2960      |          |
| 77 | H            | Isotropic = | 30.2171  | Anisotropy = | 7.7940   |
|    |              | XX=         | 34.4485  | YX=          | -1.6324  |
|    |              |             |          | ZX=          | 2.7480   |
|    |              | XY=         | -1.6933  | YY=          | 28.4309  |
|    |              |             |          | ZY=          | -0.3013  |
|    |              | XZ=         | 1.3324   | YZ=          | -0.0628  |
|    |              |             |          | ZZ=          | 27.7717  |
|    | Eigenvalues: | 27.1194     | 28.1188  | 35.4131      |          |
| 78 | C            | Isotropic = | 161.3276 | Anisotropy = | 30.9131  |
|    |              | XX=         | 168.8867 | YX=          | -4.3288  |
|    |              |             |          | ZX=          | -13.4103 |
|    |              | XY=         | -4.2472  | YY=          | 148.8359 |
|    |              |             |          | ZY=          | 3.4193   |
|    |              | XZ=         | -13.5190 | YZ=          | 2.7672   |
|    |              |             |          | ZZ=          | 166.2602 |
|    | Eigenvalues: | 147.9461    | 154.1003 | 181.9363     |          |
| 79 | C            | Isotropic = | 132.7569 | Anisotropy = | 19.5506  |
|    |              | XX=         | 144.0216 | YX=          | -2.3851  |
|    |              |             |          | ZX=          | -1.6931  |
|    |              | XY=         | -7.4887  | YY=          | 109.6262 |
|    |              |             |          | ZY=          | -1.5726  |
|    |              | XZ=         | -0.2874  | YZ=          | 3.4568   |
|    |              |             |          | ZZ=          | 144.6230 |
|    | Eigenvalues: | 108.9139    | 143.5662 | 145.7906     |          |
| 80 | C            | Isotropic = | 132.4058 | Anisotropy = | 18.1411  |
|    |              | XX=         | 141.4883 | YX=          | -10.2514 |
|    |              |             |          | ZX=          | -0.6201  |
|    |              | XY=         | -5.1630  | YY=          | 111.8317 |
|    |              |             |          | ZY=          | 1.8430   |
|    |              | XZ=         | -1.4670  | YZ=          | -3.6530  |
|    |              |             |          | ZZ=          | 143.8975 |
|    | Eigenvalues: | 109.9110    | 142.8066 | 144.4999     |          |
| 81 | H            | Isotropic = | 30.1638  | Anisotropy = | 8.0576   |
|    |              | XX=         | 27.2900  | YX=          | -0.0707  |
|    |              |             |          | ZX=          | 0.9025   |
|    |              | XY=         | -0.1916  | YY=          | 27.9043  |
|    |              |             |          | ZY=          | -0.0976  |
|    |              | XZ=         | 1.8458   | YZ=          | -0.3932  |
|    |              |             |          | ZZ=          | 35.2972  |
|    | Eigenvalues: | 27.0513     | 27.9046  | 35.5355      |          |
| 82 | H            | Isotropic = | 27.4554  | Anisotropy = | 8.0185   |
|    |              | XX=         | 25.1677  | YX=          | -1.5609  |
|    |              |             |          | ZX=          | 0.0974   |
|    |              | XY=         | -1.0870  | YY=          | 31.9507  |
|    |              |             |          | ZY=          | -1.7747  |
|    |              | XZ=         | -0.3585  | YZ=          | -2.6007  |
|    |              |             |          | ZZ=          | 25.2478  |
|    | Eigenvalues: | 24.2526     | 25.3126  | 32.8011      |          |
| 83 | H            | Isotropic = | 28.0374  | Anisotropy = | 7.7987   |
|    |              | XX=         | 27.0269  | YX=          | 3.0786   |
|    |              |             |          | ZX=          | 1.2190   |
|    |              | XY=         | 2.7080   | YY=          | 30.8690  |
|    |              |             |          | ZY=          | 1.9218   |
|    |              | XZ=         | 1.1882   | YZ=          | 2.2177   |
|    |              |             |          | ZZ=          | 26.2164  |
|    | Eigenvalues: | 25.3516     | 25.5241  | 33.2366      |          |
| 84 | N            | Isotropic = | 148.0340 | Anisotropy = | 59.3702  |
|    |              | XX=         | 136.8360 | YX=          | 51.6604  |
|    |              |             |          | ZX=          | 0.1503   |
|    |              | XY=         | 30.7585  | YY=          | 131.1223 |
|    |              |             |          | ZY=          | -5.0572  |
|    |              | XZ=         | 6.2253   | YZ=          | 32.1169  |
|    |              |             |          | ZZ=          | 176.1437 |
|    | Eigenvalues: | 91.9496     | 164.5383 | 187.6141     |          |
| 85 | N            | Isotropic = | 148.1389 | Anisotropy = | 57.5130  |
|    |              | XX=         | 106.3543 | YX=          | -40.1982 |
|    |              |             |          | ZX=          | 0.3267   |
|    |              | XY=         | -19.7177 | YY=          | 162.4447 |
|    |              |             |          | ZY=          | 5.1567   |
|    |              | XZ=         | -7.6037  | YZ=          | -31.3135 |
|    |              |             |          | ZZ=          | 175.6176 |
|    | Eigenvalues: | 92.4709     | 165.4649 | 186.4808     |          |
| 86 | H            | Isotropic = | 24.3485  | Anisotropy = | 19.1149  |
|    |              | XX=         | 30.2700  | YX=          | 6.7306   |
|    |              |             |          | ZX=          | -0.7342  |
|    |              | XY=         | 7.3555   | YY=          | 29.6452  |
|    |              |             |          | ZY=          | 0.0184   |

|    |              |             |          |              |          |          |
|----|--------------|-------------|----------|--------------|----------|----------|
|    | XZ=          | -2.0109     | YZ=      | -1.2570      | ZZ=      | 13.1303  |
|    | Eigenvalues: | 13.0209     | 22.9329  | 37.0918      |          |          |
| 87 | N            | Isotropic = | 150.0519 | Anisotropy = | 64.2426  |          |
|    | XX=          | 168.6279    | YX=      | -36.3554     | ZX=      | 1.9954   |
|    | XY=          | 6.0465      | YY=      | 152.9037     | ZY=      | -30.5325 |
|    | XZ=          | -1.2795     | YZ=      | -57.5663     | ZZ=      | 128.6239 |
|    | Eigenvalues: | 93.9878     | 163.2875 | 192.8802     |          |          |
| 88 | H            | Isotropic = | 25.3957  | Anisotropy = | 15.7407  |          |
|    | XX=          | 17.2614     | YX=      | -2.3860      | ZX=      | -4.8472  |
|    | XY=          | -1.1782     | YY=      | 33.0652      | ZY=      | 5.6439   |
|    | XZ=          | -3.9775     | YZ=      | 3.2774       | ZZ=      | 25.8605  |
|    | Eigenvalues: | 15.3997     | 24.8980  | 35.8895      |          |          |
| 89 | N            | Isotropic = | 146.5642 | Anisotropy = | 59.6109  |          |
|    | XX=          | 177.0722    | YX=      | 21.4138      | ZX=      | 11.6747  |
|    | XY=          | -14.0672    | YY=      | 143.3027     | ZY=      | 26.6961  |
|    | XZ=          | 15.1863     | YZ=      | 51.4106      | ZZ=      | 119.3175 |
|    | Eigenvalues: | 89.5936     | 163.7942 | 186.3047     |          |          |
| 90 | H            | Isotropic = | 24.0409  | Anisotropy = | 18.9016  |          |
|    | XX=          | 14.4016     | YX=      | 4.9811       | ZX=      | -3.8886  |
|    | XY=          | 3.8148      | YY=      | 31.1912      | ZY=      | -6.2296  |
|    | XZ=          | -2.9368     | YZ=      | -5.6760      | ZZ=      | 26.5299  |
|    | Eigenvalues: | 13.0019     | 22.4788  | 36.6420      |          |          |
| 91 | C            | Isotropic = | 43.3399  | Anisotropy = | 102.2552 |          |
|    | XX=          | 106.7831    | YX=      | -16.1249     | ZX=      | 8.0450   |
|    | XY=          | -20.6273    | YY=      | -7.0340      | ZY=      | -0.8124  |
|    | XZ=          | 16.2167     | YZ=      | -2.0404      | ZZ=      | 30.2708  |
|    | Eigenvalues: | -9.9332     | 28.4430  | 111.5101     |          |          |
| 92 | C            | Isotropic = | 42.1137  | Anisotropy = | 103.1256 |          |
|    | XX=          | 27.2546     | YX=      | -8.7764      | ZX=      | 5.5474   |
|    | XY=          | -8.0180     | YY=      | -11.7190     | ZY=      | -3.3650  |
|    | XZ=          | -4.5609     | YZ=      | -1.7449      | ZZ=      | 110.8054 |
|    | Eigenvalues: | -13.4977    | 28.9747  | 110.8641     |          |          |
| 93 | O            | Isotropic = | 106.9825 | Anisotropy = | 283.5864 |          |
|    | XX=          | 9.0726      | YX=      | 1.0911       | ZX=      | 28.1246  |
|    | XY=          | 1.8298      | YY=      | 15.9725      | ZY=      | -10.8830 |
|    | XZ=          | -36.6075    | YZ=      | 1.7566       | ZZ=      | 295.9023 |
|    | Eigenvalues: | 8.7390      | 16.1684  | 296.0401     |          |          |
| 94 | O            | Isotropic = | 108.8461 | Anisotropy = | 268.2230 |          |
|    | XX=          | 275.1916    | YX=      | -46.9501     | ZX=      | -8.3839  |
|    | XY=          | -50.8543    | YY=      | 33.0914      | ZY=      | -1.9736  |
|    | XZ=          | 63.2662     | YZ=      | -11.9248     | ZZ=      | 18.2552  |
|    | Eigenvalues: | 15.0005     | 23.8764  | 287.6614     |          |          |
| 95 | H            | Isotropic = | 24.0655  | Anisotropy = | 19.5909  |          |
|    | XX=          | 24.2403     | YX=      | -4.6989      | ZX=      | -0.6655  |
|    | XY=          | -5.4318     | YY=      | 35.0574      | ZY=      | 0.3636   |
|    | XZ=          | -1.4875     | YZ=      | 1.5264       | ZZ=      | 12.8988  |
|    | Eigenvalues: | 12.7866     | 22.2838  | 37.1261      |          |          |
| 96 | H            | Isotropic = | 30.0470  | Anisotropy = | 8.2669   |          |
|    | XX=          | 34.9357     | YX=      | -1.0388      | ZX=      | -2.5160  |
|    | XY=          | -1.1038     | YY=      | 27.8475      | ZY=      | 0.2197   |
|    | XZ=          | -1.4254     | YZ=      | -0.2155      | ZZ=      | 27.3578  |
|    | Eigenvalues: | 26.8063     | 27.7764  | 35.5582      |          |          |
| 97 | C            | Isotropic = | 161.6254 | Anisotropy = | 26.7314  |          |
|    | XX=          | 167.6179    | YX=      | -1.6056      | ZX=      | 11.1907  |

|     |              |             |          |              |         |          |
|-----|--------------|-------------|----------|--------------|---------|----------|
|     | XY=          | -1.8055     | YY=      | 150.3101     | ZY=     | -4.5296  |
|     | XZ=          | 11.8891     | YZ=      | -4.1119      | ZZ=     | 166.9483 |
|     | Eigenvalues: | 149.1517    | 156.2783 | 179.4464     |         |          |
| 98  | C            | Isotropic = | 132.1854 | Anisotropy = | 18.9389 |          |
|     | XX=          | 142.8616    | YX=      | -2.6494      | ZX=     | 1.2343   |
|     | XY=          | -8.3305     | YY=      | 109.9078     | ZY=     | 1.0705   |
|     | XZ=          | 0.1738      | YZ=      | -4.8462      | ZZ=     | 143.7868 |
|     | Eigenvalues: | 108.9293    | 142.8156 | 144.8114     |         |          |
| 99  | C            | Isotropic = | 131.3838 | Anisotropy = | 19.4443 |          |
|     | XX=          | 140.6856    | YX=      | -9.1312      | ZX=     | 1.4960   |
|     | XY=          | -4.0368     | YY=      | 111.3235     | ZY=     | -3.0451  |
|     | XZ=          | 2.9361      | YZ=      | 2.4642       | ZZ=     | 142.1422 |
|     | Eigenvalues: | 109.9137    | 139.8909 | 144.3466     |         |          |
| 100 | H            | Isotropic = | 30.0748  | Anisotropy = | 8.3429  |          |
|     | XX=          | 27.4798     | YX=      | 0.4544       | ZX=     | -1.3882  |
|     | XY=          | 0.2179      | YY=      | 27.5810      | ZY=     | -0.2688  |
|     | XZ=          | -2.5127     | YZ=      | -0.0355      | ZZ=     | 35.1636  |
|     | Eigenvalues: | 26.8892     | 27.6985  | 35.6367      |         |          |
| 101 | H            | Isotropic = | 27.9865  | Anisotropy = | 7.4520  |          |
|     | XX=          | 25.5037     | YX=      | -0.5375      | ZX=     | -0.5394  |
|     | XY=          | -0.5487     | YY=      | 32.3475      | ZY=     | 1.8917   |
|     | XZ=          | -0.4296     | YZ=      | 1.9706       | ZZ=     | 26.1084  |
|     | Eigenvalues: | 25.1814     | 25.8237  | 32.9545      |         |          |
| 102 | H            | Isotropic = | 27.7303  | Anisotropy = | 7.9720  |          |
|     | XX=          | 27.6378     | YX=      | 3.5524       | ZX=     | -1.5119  |
|     | XY=          | 3.0301      | YY=      | 29.1539      | ZY=     | -2.2469  |
|     | XZ=          | -1.6177     | YZ=      | -2.6866      | ZZ=     | 26.3993  |
|     | Eigenvalues: | 24.7819     | 25.3641  | 33.0449      |         |          |
| 103 | N            | Isotropic = | 147.0721 | Anisotropy = | 55.1357 |          |
|     | XX=          | 139.6579    | YX=      | 55.5659      | ZX=     | 6.6536   |
|     | XY=          | 29.4925     | YY=      | 129.2329     | ZY=     | 2.0842   |
|     | XZ=          | -2.1026     | YZ=      | -31.3984     | ZZ=     | 172.3256 |
|     | Eigenvalues: | 89.6949     | 167.6923 | 183.8293     |         |          |
| 104 | N            | Isotropic = | 145.3835 | Anisotropy = | 60.8235 |          |
|     | XX=          | 99.7326     | YX=      | -43.8771     | ZX=     | -3.8359  |
|     | XY=          | -18.4659    | YY=      | 159.9294     | ZY=     | -5.3242  |
|     | XZ=          | 6.7007      | YZ=      | 29.9201      | ZZ=     | 176.4886 |
|     | Eigenvalues: | 86.0790     | 164.1390 | 185.9325     |         |          |
| 105 | H            | Isotropic = | 23.7926  | Anisotropy = | 19.4566 |          |
|     | XX=          | 29.3498     | YX=      | 7.0637       | ZX=     | 1.0472   |
|     | XY=          | 7.6758      | YY=      | 29.2534      | ZY=     | 0.1971   |
|     | XZ=          | 2.2480      | YZ=      | 0.7016       | ZZ=     | 12.7747  |
|     | Eigenvalues: | 12.6069     | 22.0073  | 36.7637      |         |          |
| 106 | N            | Isotropic = | 145.6124 | Anisotropy = | 61.7987 |          |
|     | XX=          | 170.5029    | YX=      | -35.9949     | ZX=     | 4.6342   |
|     | XY=          | 1.2949      | YY=      | 151.7612     | ZY=     | 27.0725  |
|     | XZ=          | 6.4310      | YZ=      | 53.0357      | ZZ=     | 114.5730 |
|     | Eigenvalues: | 86.6288     | 163.3968 | 186.8115     |         |          |
| 107 | H            | Isotropic = | 23.5569  | Anisotropy = | 20.3394 |          |
|     | XX=          | 12.7325     | YX=      | 2.5219       | ZX=     | 0.6255   |
|     | XY=          | 3.2700      | YY=      | 32.0233      | ZY=     | -7.7514  |
|     | XZ=          | -0.2783     | YZ=      | -6.8768      | ZZ=     | 25.9150  |
|     | Eigenvalues: | 12.1708     | 21.3834  | 37.1166      |         |          |
| 108 | N            | Isotropic = | 147.6027 | Anisotropy = | 54.2502 |          |

|     |              |             |          |              |          |          |
|-----|--------------|-------------|----------|--------------|----------|----------|
|     | XX=          | 176.6182    | YX=      | 23.6295      | ZX=      | -2.0252  |
|     | XY=          | -9.8162     | YY=      | 144.1774     | ZY=      | -27.7715 |
|     | XZ=          | -5.4358     | YZ=      | -53.7713     | ZZ=      | 122.0125 |
|     | Eigenvalues: | 90.8263     | 168.2123 | 183.7695     |          |          |
| 109 | H            | Isotropic = | 24.9050  | Anisotropy = | 15.0771  |          |
|     | XX=          | 15.6856     | YX=      | 0.9699       | ZX=      | 0.8185   |
|     | XY=          | -0.5932     | YY=      | 31.4498      | ZY=      | 6.0364   |
|     | XZ=          | 0.2350      | YZ=      | 4.1127       | ZZ=      | 27.5796  |
|     | Eigenvalues: | 15.6622     | 24.0964  | 34.9564      |          |          |
| 110 | C            | Isotropic = | 41.2857  | Anisotropy = | 103.2870 |          |
|     | XX=          | 106.1610    | YX=      | -19.9908     | ZX=      | 4.0868   |
|     | XY=          | -23.4398    | YY=      | -9.9717      | ZY=      | 1.5229   |
|     | XZ=          | -7.6698     | YZ=      | 2.6168       | ZZ=      | 27.6679  |
|     | Eigenvalues: | -13.9703    | 27.6838  | 110.1437     |          |          |
| 111 | C            | Isotropic = | 41.0695  | Anisotropy = | 103.9982 |          |
|     | XX=          | 23.8298     | YX=      | -8.7727      | ZX=      | -7.7592  |
|     | XY=          | -9.9515     | YY=      | -10.9275     | ZY=      | 0.1452   |
|     | XZ=          | 3.8928      | YZ=      | -5.5785      | ZZ=      | 110.3062 |
|     | Eigenvalues: | -13.3669    | 26.1738  | 110.4016     |          |          |
| 112 | O            | Isotropic = | 99.6019  | Anisotropy = | 276.0413 |          |
|     | XX=          | 3.3594      | YX=      | 4.7758       | ZX=      | -29.4179 |
|     | XY=          | 3.2553      | YY=      | 11.8718      | ZY=      | 13.5468  |
|     | XZ=          | 22.5823     | YZ=      | -9.6452      | ZZ=      | 283.5744 |
|     | Eigenvalues: | 1.7102      | 13.4660  | 283.6294     |          |          |
| 113 | O            | Isotropic = | 97.2042  | Anisotropy = | 281.6395 |          |
|     | XX=          | 272.8841    | YX=      | -49.2852     | ZX=      | 21.7183  |
|     | XY=          | -62.6773    | YY=      | 21.9073      | ZY=      | -6.5937  |
|     | XZ=          | -36.1454    | YZ=      | 3.8815       | ZZ=      | -3.1786  |
|     | Eigenvalues: | -3.9131     | 10.5620  | 284.9639     |          |          |
| 114 | H            | Isotropic = | 24.8645  | Anisotropy = | 15.0363  |          |
|     | XX=          | 25.6543     | YX=      | -2.9743      | ZX=      | 0.0895   |
|     | XY=          | -4.9486     | YY=      | 32.7409      | ZY=      | 3.7293   |
|     | XZ=          | 0.0642      | YZ=      | 2.1270       | ZZ=      | 16.1985  |
|     | Eigenvalues: | 15.6346     | 24.0702  | 34.8887      |          |          |
| 115 | C            | Isotropic = | 65.1561  | Anisotropy = | 126.0875 |          |
|     | XX=          | 102.7067    | YX=      | -49.3099     | ZX=      | -8.6504  |
|     | XY=          | -47.0411    | YY=      | 62.8914      | ZY=      | 53.6315  |
|     | XZ=          | -10.0234    | YZ=      | 57.8415      | ZZ=      | 29.8702  |
|     | Eigenvalues: | -16.1847    | 62.4386  | 149.2144     |          |          |
| 116 | C            | Isotropic = | 62.0648  | Anisotropy = | 152.6754 |          |
|     | XX=          | 79.7222     | YX=      | -79.5710     | ZX=      | -35.3881 |
|     | XY=          | -69.0788    | YY=      | 62.4805      | ZY=      | 32.8698  |
|     | XZ=          | -42.2197    | YZ=      | 19.2316      | ZZ=      | 43.9917  |
|     | Eigenvalues: | -4.8875     | 27.2335  | 163.8485     |          |          |
| 117 | C            | Isotropic = | 42.5346  | Anisotropy = | 95.2229  |          |
|     | XX=          | 59.5912     | YX=      | -29.0395     | ZX=      | -47.9885 |
|     | XY=          | -23.7985    | YY=      | 73.5624      | ZY=      | 8.3674   |
|     | XZ=          | -41.6524    | YZ=      | 9.6054       | ZZ=      | -5.5500  |
|     | Eigenvalues: | -28.5511    | 50.1383  | 106.0165     |          |          |
| 118 | C            | Isotropic = | 74.9658  | Anisotropy = | 130.9378 |          |
|     | XX=          | 104.9210    | YX=      | -58.5779     | ZX=      | -13.2413 |
|     | XY=          | -51.6960    | YY=      | 81.9948      | ZY=      | 40.1984  |
|     | XZ=          | -17.0965    | YZ=      | 45.1026      | ZZ=      | 37.9815  |
|     | Eigenvalues: | 8.2630      | 54.3766  | 162.2577     |          |          |

119 C Isotropic = 42.0999 Anisotropy = 97.0281  
XX= 45.4977 YX= -65.6673 ZX= -16.0832  
XY= -64.8797 YY= 26.5999 ZY= 2.4957  
XZ= -20.7808 YZ= 3.0435 ZZ= 54.2022  
Eigenvalues: -31.0963 50.6108 106.7854

120 C Isotropic = 61.1818 Anisotropy = 151.7790  
XX= 89.5552 YX= -52.7894 ZX= -50.5405  
XY= -64.2630 YY= 74.6471 ZY= 18.4590  
XZ= -50.0016 YZ= 33.4828 ZZ= 19.3432  
Eigenvalues: -7.2001 28.3778 162.3678

121 C Isotropic = 62.5296 Anisotropy = 153.7000  
XX= 66.5899 YX= -34.8934 ZX= 82.9051  
XY= -18.3036 YY= 31.3006 ZY= -23.4596  
XZ= 76.3261 YZ= -7.7179 ZZ= 89.6983  
Eigenvalues: -5.4223 28.0147 164.9963

122 C Isotropic = 62.5010 Anisotropy = 131.0571  
XX= 91.6746 YX= -38.8559 ZX= 41.5316  
XY= -35.5432 YY= -8.1997 ZY= -20.1043  
XZ= 40.3266 YZ= -23.3020 ZZ= 104.0282  
Eigenvalues: -21.0822 58.7127 149.8724

123 C Isotropic = 62.8259 Anisotropy = 153.4143  
XX= 86.5027 YX= -4.8419 ZX= 72.8384  
XY= -19.5699 YY= 24.5453 ZY= -25.4320  
XZ= 78.1088 YZ= -42.9465 ZZ= 77.4297  
Eigenvalues: -5.2964 28.6720 165.1021

124 C Isotropic = 41.3883 Anisotropy = 96.3946  
XX= 35.3885 YX= -35.1490 ZX= 56.0293  
XY= -29.1971 YY= 40.2031 ZY= 5.1106  
XZ= 61.3219 YZ= 8.1401 ZZ= 48.5732  
Eigenvalues: -29.0712 47.5846 105.6513

125 C Isotropic = 74.2387 Anisotropy = 131.2398  
XX= 97.2202 YX= -29.8477 ZX= 49.7282  
XY= -30.2579 YY= 17.5007 ZY= -21.7318  
XZ= 49.6667 YZ= -21.6819 ZZ= 107.9953  
Eigenvalues: 7.1185 53.8657 161.7319

126 C Isotropic = 41.2940 Anisotropy = 96.7713  
XX= 54.3125 YX= 15.2680 ZX= 50.4049  
XY= 11.6291 YY= 18.3247 ZY= -38.5317  
XZ= 45.5382 YZ= -44.1160 ZZ= 51.2449  
Eigenvalues: -29.2551 47.3290 105.8082

127 C Isotropic = 75.9951 Anisotropy = 130.3573  
XX= 54.1189 YX= 51.6115 ZX= -13.0892  
XY= 45.2759 YY= 136.3979 ZY= 26.9425  
XZ= -11.1727 YZ= 33.3205 ZZ= 37.4686  
Eigenvalues: 9.2362 55.8492 162.9000

128 C Isotropic = 42.2216 Anisotropy = 94.9645  
XX= 51.5254 YX= 17.7379 ZX= 27.7442  
XY= 14.5945 YY= 94.4264 ZY= 19.2716  
XZ= 22.4131 YZ= 18.9717 ZZ= -19.2871  
Eigenvalues: -28.7710 49.9044 105.5312

129 C Isotropic = 61.8068 Anisotropy = 152.5349  
XX= 25.2521 YX= 64.0283 ZX= 15.5701  
XY= 54.3293 YY= 129.2041 ZY= 30.6786  
XZ= 28.2533 YZ= 18.5722 ZZ= 30.9642

Eigenvalues:    -4.7855    26.7091    163.4967  
 130 C    Isotropic =    63.7200    Anisotropy =    129.2133  
       XX=    45.8627    YX=    54.0662    ZX=    -24.3764  
       XY=    50.6533    YY=    117.3625    ZY=    37.2095  
       XZ=    -24.0255    YZ=    40.5965    ZZ=    27.9347  
 Eigenvalues:    -18.2588    59.5565    149.8622  
 131 C    Isotropic =    61.5844    Anisotropy =    153.2047  
       XX=    49.0443    YX=    46.4350    ZX=    29.1247  
       XY=    55.4389    YY=    131.6895    ZY=    21.3257  
       XZ=    16.9610    YZ=    34.5884    ZZ=    4.0194  
 Eigenvalues:    -6.1000    27.1324    163.7209  
 132 C    Isotropic =    41.9773    Anisotropy =    95.9046  
       XX=    -4.7467    YX=    46.5793    ZX=    18.3244  
       XY=    47.6394    YY=    83.8504    ZY=    0.4796  
       XZ=    25.1094    YZ=    2.0157    ZZ=    46.8280  
 Eigenvalues:    -30.0732    50.0913    105.9137  
 133 C    Isotropic =    42.4112    Anisotropy =    95.9156  
       XX=    -3.8349    YX=    14.3085    ZX=    -46.6164  
       XY=    11.2872    YY=    59.1194    ZY=    -15.0060  
       XZ=    -54.1659    YZ=    -18.8858    ZZ=    71.9490  
 Eigenvalues:    -29.1687    50.0473    106.3549  
 134 C    Isotropic =    62.0884    Anisotropy =    152.8635  
       XX=    49.9487    YX=    5.2869    ZX=    -56.2684  
       XY=    20.1219    YY=    25.5134    ZY=    -48.1468  
       XZ=    -54.6308    YZ=    -59.4332    ZZ=    110.8033  
 Eigenvalues:    -5.2811    27.5490    163.9975  
 135 C    Isotropic =    64.8843    Anisotropy =    126.2637  
       XX=    51.0707    YX=    52.4301    ZX=    -28.4131  
       XY=    48.9370    YY=    22.1148    ZY=    -29.2462  
       XZ=    -26.3946    YZ=    -32.0143    ZZ=    121.4674  
 Eigenvalues:    -16.6330    62.2258    149.0601  
 136 C    Isotropic =    61.2066    Anisotropy =    151.1178  
       XX=    26.1234    YX=    26.6085    ZX=    -65.6610  
       XY=    11.5067    YY=    43.5547    ZY=    -43.2479  
       XZ=    -60.5987    YZ=    -31.9976    ZZ=    113.9417  
 Eigenvalues:    -6.8734    28.5414    161.9518  
 137 C    Isotropic =    42.0449    Anisotropy =    96.6865  
       XX=    50.8782    YX=    -12.9550    ZX=    -31.5813  
       XY=    -12.4429    YY=    2.7011    ZY=    -48.7298  
       XZ=    -27.3994    YZ=    -50.7066    ZZ=    72.5552  
 Eigenvalues:    -30.9905    50.6225    106.5025  
 138 C    Isotropic =    74.8693    Anisotropy =    131.0618  
       XX=    53.8060    YX=    40.7375    ZX=    -34.0506  
       XY=    37.4727    YY=    43.0099    ZY=    -35.5040  
       XZ=    -30.7943    YZ=    -43.1472    ZZ=    127.7918  
 Eigenvalues:    8.1399    54.2241    162.2438  
 139 C    Isotropic =    156.1850    Anisotropy =    12.9896  
       XX=    164.6248    YX=    0.8000    ZX=    0.0666  
       XY=    0.1584    YY=    161.3894    ZY=    -9.6662  
       XZ=    -2.5607    YZ=    2.9759    ZZ=    142.5409  
 Eigenvalues:    141.9068    161.8035    164.8448  
 140 C    Isotropic =    155.9048    Anisotropy =    12.8845  
       XX=    145.2979    YX=    -12.4896    ZX=    6.7090  
       XY=    -2.7319    YY=    158.8412    ZY=    2.1979

XZ= 0.8780 YZ= 2.1474 ZZ= 163.5752  
 Eigenvalues: 141.0421 162.1777 164.4944  
 141 C Isotropic = 156.2676 Anisotropy = 12.4244  
 XX= 164.4700 YX= 0.6043 ZX= -0.9414  
 XY= 1.1054 YY= 154.5346 ZY= -4.3563  
 XZ= 2.1769 YZ= -14.9003 ZZ= 149.7983  
 Eigenvalues: 142.2050 162.0473 164.5506  
 142 C Isotropic = 155.8452 Anisotropy = 13.1005  
 XX= 140.9147 YX= 4.8547 ZX= -2.2378  
 XY= -5.0863 YY= 162.5458 ZY= 1.2577  
 XZ= 2.2352 YZ= 0.7659 ZZ= 164.0752  
 Eigenvalues: 140.9141 162.0427 164.5789  
 143 O Isotropic = 189.1599 Anisotropy = 143.5725  
 XX= 169.2079 YX= -35.4809 ZX= -39.2182  
 XY= -56.9575 YY= 170.9229 ZY= 56.2614  
 XZ= -15.6953 YZ= 61.3730 ZZ= 227.3490  
 Eigenvalues: 117.3636 165.2412 284.8749  
 144 O Isotropic = 186.3435 Anisotropy = 143.2516  
 XX= 253.1358 YX= -14.0542 ZX= -53.7303  
 XY= -7.6156 YY= 167.0744 ZY= 26.5666  
 XZ= -71.2518 YZ= -18.0725 ZZ= 138.8204  
 Eigenvalues: 111.2854 165.9006 281.8446  
 145 O Isotropic = 190.5531 Anisotropy = 120.1996  
 XX= 263.8493 YX= 11.3873 ZX= 28.8560  
 XY= 6.6066 YY= 128.8297 ZY= -34.1792  
 XZ= 20.9583 YZ= -8.9376 ZZ= 178.9804  
 Eigenvalues: 118.7358 182.2374 270.6862  
 146 O Isotropic = 190.5245 Anisotropy = 121.7121  
 XX= 168.1939 YX= -9.9858 ZX= 30.9856  
 XY= -34.1718 YY= 149.9301 ZY= 30.8938  
 XZ= 44.0851 YZ= 31.5287 ZZ= 253.4494  
 Eigenvalues: 118.5590 181.3485 271.6659  
 147 O Isotropic = 189.8282 Anisotropy = 139.6033  
 XX= 135.3647 YX= 26.9296 ZX= 20.8176  
 XY= 47.4869 YY= 215.2204 ZY= 59.2230  
 XZ= -1.3144 YZ= 57.3986 ZZ= 218.8995  
 Eigenvalues: 118.5668 168.0207 282.8971  
 148 O Isotropic = 190.2185 Anisotropy = 139.8592  
 XX= 243.9510 YX= 51.9908 ZX= -7.4301  
 XY= 59.0052 YY= 203.1832 ZY= 29.6116  
 XZ= 10.0243 YZ= 5.2050 ZZ= 123.5211  
 Eigenvalues: 118.7699 168.4275 283.4579  
 149 O Isotropic = 189.3976 Anisotropy = 143.3257  
 XX= 244.6135 YX= 36.9092 ZX= -39.6073  
 XY= 26.9539 YY= 134.2250 ZY= -45.5419  
 XZ= -55.6695 YZ= -19.5097 ZZ= 189.3543  
 Eigenvalues: 118.2568 164.9880 284.9481  
 150 O Isotropic = 186.9439 Anisotropy = 142.7615  
 XX= 135.0586 YX= -25.4617 ZX= -59.9053  
 XY= 21.1248 YY= 170.5568 ZY= 26.0618  
 XZ= -54.2196 YZ= 18.3390 ZZ= 255.2163  
 Eigenvalues: 111.5909 167.1225 282.1182  
 151 C Isotropic = 49.4963 Anisotropy = 135.8777  
 XX= 130.0187 YX= 35.9364 ZX= -17.5532



|     |              |             |          |              |          |           |
|-----|--------------|-------------|----------|--------------|----------|-----------|
|     | XY=          | 42.0556     | YY=      | -35.3038     | ZY=      | 26.7168   |
|     | XZ=          | -11.6494    | YZ=      | 6.9488       | ZZ=      | 53.7741   |
|     | Eigenvalues: | -47.8499    | 56.2575  | 140.0815     |          |           |
| 152 | C            | Isotropic = | 49.9599  | Anisotropy = | 134.4942 |           |
|     | XX=          | 129.5226    | YX=      | 34.6484      | ZX=      | -18.8454  |
|     | XY=          | 34.6544     | YY=      | 4.4874       | ZY=      | 37.1924   |
|     | XZ=          | -26.5754    | YZ=      | 49.8925      | ZZ=      | 15.8697   |
|     | Eigenvalues: | -43.4813    | 53.7383  | 139.6227     |          |           |
| 153 | N            | Isotropic = | -54.1085 | Anisotropy = | 474.2049 |           |
|     | XX=          | 221.2904    | YX=      | 145.4126     | ZX=      | -66.7309  |
|     | XY=          | 131.0232    | YY=      | -283.3881    | ZY=      | 62.2577   |
|     | XZ=          | -52.2625    | YZ=      | 51.2714      | ZZ=      | -100.2278 |
|     | Eigenvalues: | -339.3769   | -84.9768 | 262.0281     |          |           |
| 154 | C            | Isotropic = | 38.3722  | Anisotropy = | 95.9357  |           |
|     | XX=          | 94.3661     | YX=      | 33.7994      | ZX=      | 0.4925    |
|     | XY=          | 23.4157     | YY=      | -15.4356     | ZY=      | -37.4187  |
|     | XZ=          | -5.0738     | YZ=      | -8.7911      | ZZ=      | 36.1861   |
|     | Eigenvalues: | -29.7627    | 42.5500  | 102.3293     |          |           |
| 155 | C            | Isotropic = | 37.7549  | Anisotropy = | 97.1625  |           |
|     | XX=          | 93.9299     | YX=      | 20.7595      | ZX=      | -28.6303  |
|     | XY=          | 19.0263     | YY=      | 37.6209      | ZY=      | 34.3929   |
|     | XZ=          | -17.3549    | YZ=      | 5.0056       | ZZ=      | -18.2861  |
|     | Eigenvalues: | -30.8778    | 41.6126  | 102.5299     |          |           |
| 156 | N            | Isotropic = | -56.9030 | Anisotropy = | 477.8121 |           |
|     | XX=          | 220.3835    | YX=      | 143.0703     | ZX=      | -79.2812  |
|     | XY=          | 120.3592    | YY=      | -236.0163    | ZY=      | 97.1710   |
|     | XZ=          | -75.1418    | YZ=      | 106.0621     | ZZ=      | -155.0761 |
|     | Eigenvalues: | -345.9369   | -86.4104 | 261.6385     |          |           |
| 157 | N            | Isotropic = | -54.2843 | Anisotropy = | 474.7054 |           |
|     | XX=          | -86.8211    | YX=      | 13.7771      | ZX=      | -14.1148  |
|     | XY=          | 21.6862     | YY=      | -220.0599    | ZY=      | 229.7308  |
|     | XZ=          | -26.6067    | YZ=      | 246.9027     | ZZ=      | 144.0283  |
|     | Eigenvalues: | -340.3584   | -84.6804 | 262.1860     |          |           |
| 158 | C            | Isotropic = | 49.7370  | Anisotropy = | 134.3832 |           |
|     | XX=          | 31.5388     | YX=      | 41.7856      | ZX=      | -23.8498  |
|     | XY=          | 31.1213     | YY=      | 7.8040       | ZY=      | 63.3812   |
|     | XZ=          | -14.4898    | YZ=      | 61.0263      | ZZ=      | 109.8683  |
|     | Eigenvalues: | -44.0338    | 53.9190  | 139.3258     |          |           |
| 159 | C            | Isotropic = | 49.6838  | Anisotropy = | 135.7745 |           |
|     | XX=          | 56.8791     | YX=      | -10.3440     | ZX=      | 2.0564    |
|     | XY=          | 7.2157      | YY=      | -15.4289     | ZY=      | 72.7859   |
|     | XZ=          | -8.0941     | YZ=      | 69.3030      | ZZ=      | 107.6012  |
|     | Eigenvalues: | -47.8897    | 56.7409  | 140.2001     |          |           |
| 160 | N            | Isotropic = | -56.6271 | Anisotropy = | 477.1083 |           |
|     | XX=          | -121.0834   | YX=      | 78.8639      | ZX=      | -52.9712  |
|     | XY=          | 69.7744     | YY=      | -197.1703    | ZY=      | 215.4305  |
|     | XZ=          | -49.8078    | YZ=      | 238.8545     | ZZ=      | 148.3724  |
|     | Eigenvalues: | -345.4568   | -85.8696 | 261.4451     |          |           |
| 161 | C            | Isotropic = | 37.9717  | Anisotropy = | 96.9328  |           |
|     | XX=          | -9.0469     | YX=      | 13.6104      | ZX=      | -11.3307  |
|     | XY=          | 39.7767     | YY=      | 39.3534      | ZY=      | 31.6321   |
|     | XZ=          | -27.6563    | YZ=      | 37.2182      | ZZ=      | 83.6087   |
|     | Eigenvalues: | -30.3023    | 41.6239  | 102.5936     |          |           |
| 162 | C            | Isotropic = | 38.2140  | Anisotropy = | 96.3491  |           |

|     |              |             |          |              |          |           |
|-----|--------------|-------------|----------|--------------|----------|-----------|
|     | XX=          | 24.4883     | YX=      | -15.2478     | ZX=      | 5.6199    |
|     | XY=          | -41.5249    | YY=      | 11.8444      | ZY=      | 43.1460   |
|     | XZ=          | 18.4823     | YZ=      | 50.1972      | ZZ=      | 78.3092   |
|     | Eigenvalues: | -29.6873    | 41.8825  | 102.4467     |          |           |
| 163 | N            | Isotropic = | -45.8561 | Anisotropy = | 470.3946 |           |
|     | XX=          | 188.5192    | YX=      | 112.5208     | ZX=      | -107.1507 |
|     | XY=          | 161.6462    | YY=      | -279.9030    | ZY=      | 25.6847   |
|     | XZ=          | -140.6376   | YZ=      | 16.8021      | ZZ=      | -46.1845  |
|     | Eigenvalues: | -327.9173   | -77.3912 | 267.7403     |          |           |
| 164 | C            | Isotropic = | 39.2760  | Anisotropy = | 97.9365  |           |
|     | XX=          | 98.5393     | YX=      | 3.3621       | ZX=      | -8.0779   |
|     | XY=          | 19.0081     | YY=      | -17.8884     | ZY=      | -45.1365  |
|     | XZ=          | -22.3614    | YZ=      | -6.9228      | ZZ=      | 37.1772   |
|     | Eigenvalues: | -28.4302    | 41.6913  | 104.5671     |          |           |
| 165 | C            | Isotropic = | 38.4799  | Anisotropy = | 96.5537  |           |
|     | XX=          | 91.4581     | YX=      | 14.5573      | ZX=      | -36.4158  |
|     | XY=          | 20.1193     | YY=      | 35.5620      | ZY=      | 34.6780   |
|     | XZ=          | -28.7407    | YZ=      | 5.5307       | ZZ=      | -11.5804  |
|     | Eigenvalues: | -30.0258    | 42.6164  | 102.8490     |          |           |
| 166 | N            | Isotropic = | -57.2289 | Anisotropy = | 477.2527 |           |
|     | XX=          | 192.1431    | YX=      | 144.6305     | ZX=      | -128.7980 |
|     | XY=          | 118.3042    | YY=      | -249.9276    | ZY=      | 82.5786   |
|     | XZ=          | -138.2853   | YZ=      | 81.2808      | ZZ=      | -113.9021 |
|     | Eigenvalues: | -347.3537   | -85.2724 | 260.9396     |          |           |
| 167 | C            | Isotropic = | 50.6868  | Anisotropy = | 134.4348 |           |
|     | XX=          | 119.0413    | YX=      | 44.4966      | ZX=      | -31.8922  |
|     | XY=          | 38.9565     | YY=      | -32.8844     | ZY=      | 18.5098   |
|     | XZ=          | -28.7729    | YZ=      | -6.1643      | ZZ=      | 65.9035   |
|     | Eigenvalues: | -45.3015    | 57.0519  | 140.3100     |          |           |
| 168 | C            | Isotropic = | 50.4828  | Anisotropy = | 134.2493 |           |
|     | XX=          | 106.6563    | YX=      | 51.2833      | ZX=      | -45.5082  |
|     | XY=          | 44.4466     | YY=      | 5.0810       | ZY=      | 24.7356   |
|     | XZ=          | -54.3341    | YZ=      | 36.5334      | ZZ=      | 39.7110   |
|     | Eigenvalues: | -43.0566    | 54.5226  | 139.9824     |          |           |
| 169 | N            | Isotropic = | -46.9632 | Anisotropy = | 470.8809 |           |
|     | XX=          | -59.5575    | YX=      | -42.6190     | ZX=      | -78.8726  |
|     | XY=          | -26.5112    | YY=      | -183.3171    | ZY=      | 277.1619  |
|     | XZ=          | -62.0720    | YZ=      | 225.1645     | ZZ=      | 101.9852  |
|     | Eigenvalues: | -329.6324   | -78.2145 | 266.9575     |          |           |
| 170 | C            | Isotropic = | 39.2218  | Anisotropy = | 98.0219  |           |
|     | XX=          | 22.8684     | YX=      | -18.4196     | ZX=      | -9.2177   |
|     | XY=          | -51.5547    | YY=      | 7.8610       | ZY=      | 47.7261   |
|     | XZ=          | 9.8042      | YZ=      | 28.4475      | ZZ=      | 86.9360   |
|     | Eigenvalues: | -28.6063    | 41.7020  | 104.5697     |          |           |
| 171 | C            | Isotropic = | 38.4740  | Anisotropy = | 96.3127  |           |
|     | XX=          | -4.2472     | YX=      | 10.0579      | ZX=      | -21.2847  |
|     | XY=          | 37.1159     | YY=      | 38.6381      | ZY=      | 36.9489   |
|     | XZ=          | -35.6473    | YZ=      | 33.1629      | ZZ=      | 81.0310   |
|     | Eigenvalues: | -29.9846    | 42.7241  | 102.6824     |          |           |
| 172 | N            | Isotropic = | -56.8696 | Anisotropy = | 476.6778 |           |
|     | XX=          | -98.1861    | YX=      | 35.2930      | ZX=      | -100.6784 |
|     | XY=          | 36.5023     | YY=      | -181.3283    | ZY=      | 236.0192  |
|     | XZ=          | -86.8375    | YZ=      | 255.7672     | ZZ=      | 108.9056  |
|     | Eigenvalues: | -346.6870   | -84.8374 | 260.9156     |          |           |

173 C Isotropic = 50.6126 Anisotropy = 134.6876  
XX= 61.3872 YX= -26.6845 ZX= -9.7380  
XY= -4.3033 YY= -0.6363 ZY= 73.7581  
XZ= -18.5893 YZ= 81.3803 ZZ= 91.0871  
Eigenvalues: -45.2842 56.7178 140.4043

174 C Isotropic = 50.3152 Anisotropy = 134.6666  
XX= 45.4338 YX= 20.9090 ZX= -45.1435  
XY= 11.4135 YY= 25.0821 ZY= 74.1578  
XZ= -32.3794 YZ= 79.3007 ZZ= 80.4296  
Eigenvalues: -43.4581 54.3107 140.0929

175 C Isotropic = 34.8090 Anisotropy = 81.8639  
XX= 82.3550 YX= 22.2495 ZX= -18.7748  
XY= 21.3901 YY= 15.6848 ZY= 41.7531  
XZ= -21.2986 YZ= 57.7511 ZZ= 6.3873  
Eigenvalues: -45.7332 60.7753 89.3850

176 C Isotropic = 30.6091 Anisotropy = 97.5870  
XX= 88.4296 YX= 28.5795 ZX= -9.7435  
XY= 28.6505 YY= -33.2185 ZY= 14.9197  
XZ= -9.1913 YZ= 5.7197 ZZ= 36.6162  
Eigenvalues: -41.5073 37.6675 95.6671

177 C Isotropic = 30.7094 Anisotropy = 97.5748  
XX= 37.7890 YX= -8.5724 ZX= 0.6357  
XY= 0.7033 YY= -17.9513 ZY= 51.4323  
XZ= -2.0441 YZ= 51.6498 ZZ= 72.2905  
Eigenvalues: -41.4681 37.8370 95.7592

178 C Isotropic = 34.3308 Anisotropy = 83.0802  
XX= 24.6116 YX= 51.6321 ZX= -24.8880  
XY= 36.5895 YY= 7.4651 ZY= 39.3202  
XZ= -19.0634 YZ= 39.2905 ZZ= 70.9157  
Eigenvalues: -45.8047 59.0795 89.7176

179 C Isotropic = 35.7387 Anisotropy = 82.1765  
XX= 65.4070 YX= 36.4544 ZX= -38.4689  
XY= 29.4538 YY= 15.1250 ZY= 35.6173  
XZ= -40.0405 YZ= 49.5085 ZZ= 26.6841  
Eigenvalues: -45.3290 62.0221 90.5231

180 C Isotropic = 30.8939 Anisotropy = 95.2522  
XX= 75.2799 YX= 25.2284 ZX= -24.7125  
XY= 31.9058 YY= -33.2072 ZY= 5.7520  
XZ= -23.5608 YZ= -0.8442 ZZ= 50.6090  
Eigenvalues: -41.0344 39.3206 94.3953

181 C Isotropic = 35.3905 Anisotropy = 82.9317  
XX= 39.0942 YX= 36.9286 ZX= -40.1521  
XY= 24.0568 YY= 17.6503 ZY= 48.0862  
XZ= -33.8667 YZ= 52.5354 ZZ= 49.4271  
Eigenvalues: -45.1764 60.6697 90.6783

182 C Isotropic = 31.0393 Anisotropy = 94.9890  
XX= 45.8473 YX= -19.2013 ZX= -9.7311  
XY= -12.5505 YY= -9.5235 ZY= 57.8941  
XZ= -13.3342 YZ= 51.8190 ZZ= 56.7941  
Eigenvalues: -41.2514 40.0041 94.3653

183 O Isotropic = -142.9333 Anisotropy = 770.6682  
XX= 236.3814 YX= 22.9916 ZX= -270.9574  
XY= 26.0514 YY= -385.6826 ZY= -214.6665  
XZ= -275.6706 YZ= -219.6737 ZZ= -279.4987

Eigenvalues: -587.4839 -212.1615 370.8455  
 184 O Isotropic = -83.4660 Anisotropy = 675.9819  
 XX= 179.9668 YX= 68.0941 ZX= -328.7595  
 XY= 69.1624 YY= -139.8068 ZY= -96.1978  
 XZ= -322.5341 YZ= -84.6135 ZZ= -290.5580  
 Eigenvalues: -464.8086 -152.7779 367.1886  
 185 O Isotropic = -134.1912 Anisotropy = 756.2705  
 XX= -455.3811 YX= -163.0514 ZX= 52.0152  
 XY= -158.6548 YY= -199.9095 ZY= 257.7067  
 XZ= 52.8196 YZ= 258.1599 ZZ= 252.7171  
 Eigenvalues: -568.1947 -204.3679 369.9891  
 186 N Isotropic = 88.7035 Anisotropy = 103.6433  
 XX= 62.8231 YX= 9.5283 ZX= -6.9242  
 XY= 6.2455 YY= 63.8309 ZY= 40.1349  
 XZ= -6.8779 YZ= 42.6153 ZZ= 139.4565  
 Eigenvalues: 40.9937 67.3178 157.7991  
 187 O Isotropic = -82.6022 Anisotropy = 671.7886  
 XX= -457.2549 YX= 10.9952 ZX= -37.5588  
 XY= 0.8112 YY= -63.6325 ZY= 197.1655  
 XZ= -35.3345 YZ= 197.4990 ZZ= 273.0807  
 Eigenvalues: -459.7876 -153.2759 365.2568  
 188 O Isotropic = -137.9553 Anisotropy = 761.3251  
 XX= 334.8147 YX= 138.2357 ZX= -41.5685  
 XY= 137.8340 YY= -363.8817 ZY= -193.9845  
 XZ= -41.9583 YZ= -197.6683 ZZ= -384.7991  
 Eigenvalues: -575.2611 -208.1996 369.5947  
 189 O Isotropic = -80.9428 Anisotropy = 669.3700  
 XX= 332.7108 YX= 100.7254 ZX= -88.7750  
 XY= 99.9564 YY= -135.8123 ZY= -62.3946  
 XZ= -88.0490 YZ= -52.4372 ZZ= -439.7269  
 Eigenvalues: -456.5537 -151.5786 365.3039  
 190 O Isotropic = -139.9314 Anisotropy = 767.3270  
 XX= -411.7741 YX= -256.2667 ZX= -152.2171  
 XY= -250.6581 YY= -206.8955 ZY= 220.4670  
 XZ= -149.3407 YZ= 216.2330 ZZ= 198.8755  
 Eigenvalues: -582.7285 -208.6855 371.6200  
 191 O Isotropic = -86.6867 Anisotropy = 681.3161  
 XX= -369.8426 YX= -93.6219 ZX= -246.7676  
 XY= -107.0130 YY= -31.9111 ZY= 200.9121  
 XZ= -250.5372 YZ= 199.5088 ZZ= 141.6936  
 Eigenvalues: -471.6302 -155.9540 367.5240  
 192 H Isotropic = 24.9405 Anisotropy = 8.2717  
 XX= 25.9405 YX= 2.5024 ZX= 3.3007  
 XY= 3.6020 YY= 23.4785 ZY= 1.4103  
 XZ= 2.6299 YZ= 2.3912 ZZ= 25.4026  
 Eigenvalues: 21.4151 22.9515 30.4550  
 193 H Isotropic = 23.9207 Anisotropy = 7.4630  
 XX= 23.1704 YX= 2.6479 ZX= 3.3961  
 XY= 3.3065 YY= 23.8608 ZY= 0.2563  
 XZ= 4.6776 YZ= -0.1652 ZZ= 24.7307  
 Eigenvalues: 18.7483 24.1178 28.8960  
 194 H Isotropic = 24.9287 Anisotropy = 8.9545  
 XX= 26.2487 YX= -0.7938 ZX= -4.4615  
 XY= 0.4574 YY= 22.4715 ZY= 2.3506

|     |              |             |         |              |        |         |  |
|-----|--------------|-------------|---------|--------------|--------|---------|--|
|     | XZ=          | -4.6009     | YZ=     | 1.0680       | ZZ=    | 26.0659 |  |
|     | Eigenvalues: | 20.8077     | 23.0800 | 30.8984      |        |         |  |
| 195 | H            | Isotropic = | 24.3773 | Anisotropy = | 7.4822 |         |  |
|     | XX=          | 24.4089     | YX=     | -0.0767      | ZX=    | -5.0016 |  |
|     | XY=          | -1.1280     | YY=     | 24.1741      | ZY=    | 0.0595  |  |
|     | XZ=          | -4.5109     | YZ=     | 1.0580       | ZZ=    | 24.5489 |  |
|     | Eigenvalues: | 19.7218     | 24.0446 | 29.3654      |        |         |  |
| 196 | H            | Isotropic = | 23.9456 | Anisotropy = | 7.6642 |         |  |
|     | XX=          | 25.0039     | YX=     | -2.9967      | ZX=    | -3.2276 |  |
|     | XY=          | -2.4997     | YY=     | 20.7826      | ZY=    | -0.6607 |  |
|     | XZ=          | -3.4669     | YZ=     | -1.4049      | ZZ=    | 26.0502 |  |
|     | Eigenvalues: | 18.5588     | 24.2229 | 29.0550      |        |         |  |
| 197 | H            | Isotropic = | 24.8728 | Anisotropy = | 8.7524 |         |  |
|     | XX=          | 26.5136     | YX=     | -0.5927      | ZX=    | -3.9909 |  |
|     | XY=          | -1.6654     | YY=     | 21.3455      | ZY=    | 0.4184  |  |
|     | XZ=          | -3.6939     | YZ=     | 1.4526       | ZZ=    | 26.7593 |  |
|     | Eigenvalues: | 21.1038     | 22.8068 | 30.7078      |        |         |  |
| 198 | H            | Isotropic = | 24.9377 | Anisotropy = | 8.3789 |         |  |
|     | XX=          | 26.4488     | YX=     | 2.5823       | ZX=    | 2.8453  |  |
|     | XY=          | 1.7720      | YY=     | 23.8367      | ZY=    | 3.4384  |  |
|     | XZ=          | 3.4833      | YZ=     | 2.0230       | ZZ=    | 24.5278 |  |
|     | Eigenvalues: | 21.3455     | 22.9440 | 30.5237      |        |         |  |
| 199 | H            | Isotropic = | 23.8875 | Anisotropy = | 7.4513 |         |  |
|     | XX=          | 25.0930     | YX=     | 0.8854       | ZX=    | 5.0903  |  |
|     | XY=          | 0.9362      | YY=     | 24.7979      | ZY=    | 1.8314  |  |
|     | XZ=          | 3.6455      | YZ=     | 1.6104       | ZZ=    | 21.7716 |  |
|     | Eigenvalues: | 18.6213     | 24.1862 | 28.8550      |        |         |  |
| 200 | H            | Isotropic = | 26.9797 | Anisotropy = | 3.5669 |         |  |
|     | XX=          | 24.6201     | YX=     | -0.7685      | ZX=    | 0.2786  |  |
|     | XY=          | -0.5022     | YY=     | 27.2039      | ZY=    | 1.1571  |  |
|     | XZ=          | 0.6166      | YZ=     | 0.2500       | ZZ=    | 29.1152 |  |
|     | Eigenvalues: | 24.3954     | 27.1862 | 29.3577      |        |         |  |
| 201 | H            | Isotropic = | 28.9167 | Anisotropy = | 6.6700 |         |  |
|     | XX=          | 27.5069     | YX=     | -1.1548      | ZX=    | 1.0428  |  |
|     | XY=          | -1.5432     | YY=     | 31.8802      | ZY=    | -4.1255 |  |
|     | XZ=          | 0.2928      | YZ=     | -0.8378      | ZZ=    | 27.3630 |  |
|     | Eigenvalues: | 26.2613     | 27.1254 | 33.3633      |        |         |  |
| 202 | H            | Isotropic = | 28.9018 | Anisotropy = | 6.8614 |         |  |
|     | XX=          | 26.5692     | YX=     | -2.9725      | ZX=    | 1.5245  |  |
|     | XY=          | 0.1454      | YY=     | 32.2830      | ZY=    | -1.9176 |  |
|     | XZ=          | 0.1455      | YZ=     | -2.2087      | ZZ=    | 27.8534 |  |
|     | Eigenvalues: | 26.1195     | 27.1099 | 33.4761      |        |         |  |
| 203 | H            | Isotropic = | 27.1016 | Anisotropy = | 3.5995 |         |  |
|     | XX=          | 29.2651     | YX=     | 1.3612       | ZX=    | -0.0595 |  |
|     | XY=          | 0.0823      | YY=     | 27.0888      | ZY=    | -0.7349 |  |
|     | XZ=          | -0.1096     | YZ=     | -0.6771      | ZZ=    | 24.9508 |  |
|     | Eigenvalues: | 24.7350     | 27.0685 | 29.5012      |        |         |  |
| 204 | H            | Isotropic = | 28.9237 | Anisotropy = | 6.8514 |         |  |
|     | XX=          | 27.3882     | YX=     | -1.1932      | ZX=    | 0.3643  |  |
|     | XY=          | -0.6363     | YY=     | 32.0120      | ZY=    | -1.0665 |  |
|     | XZ=          | 1.0587      | YZ=     | -4.4136      | ZZ=    | 27.3709 |  |
|     | Eigenvalues: | 26.0426     | 27.2371 | 33.4913      |        |         |  |
| 205 | H            | Isotropic = | 27.1287 | Anisotropy = | 3.6014 |         |  |
|     | XX=          | 24.8562     | YX=     | -0.2153      | ZX=    | 0.1668  |  |

|     |              |             |         |              |          |          |  |
|-----|--------------|-------------|---------|--------------|----------|----------|--|
|     | XY=          | -0.1643     | YY=     | 27.6712      | ZY=      | 0.5433   |  |
|     | XZ=          | 0.4816      | YZ=     | 1.6741       | ZZ=      | 28.8586  |  |
|     | Eigenvalues: | 24.8001     | 27.0563 | 29.5296      |          |          |  |
| 206 | H            | Isotropic = | 27.0176 | Anisotropy = | 3.3986   |          |  |
|     | XX=          | 29.2635     | YX=     | -0.1920      | ZX=      | 0.1479   |  |
|     | XY=          | 0.5947      | YY=     | 26.6685      | ZY=      | -0.9882  |  |
|     | XZ=          | -0.2419     | YZ=     | -1.1142      | ZZ=      | 25.1208  |  |
|     | Eigenvalues: | 24.5888     | 27.1806 | 29.2834      |          |          |  |
| 207 | H            | Isotropic = | 28.9315 | Anisotropy = | 6.7024   |          |  |
|     | XX=          | 26.6142     | YX=     | 0.1378       | ZX=      | 0.0103   |  |
|     | XY=          | -2.9201     | YY=     | 31.9227      | ZY=      | -2.3493  |  |
|     | XZ=          | 1.4145      | YZ=     | -2.2736      | ZZ=      | 28.2575  |  |
|     | Eigenvalues: | 26.2530     | 27.1417 | 33.3997      |          |          |  |
| 208 | H            | Isotropic = | 21.5550 | Anisotropy = | 16.7545  |          |  |
|     | XX=          | 21.9560     | YX=     | -4.8075      | ZX=      | 1.0473   |  |
|     | XY=          | -4.3130     | YY=     | 29.5998      | ZY=      | -4.5082  |  |
|     | XZ=          | 1.1980      | YZ=     | -4.1900      | ZZ=      | 13.1092  |  |
|     | Eigenvalues: | 12.0325     | 19.9079 | 32.7247      |          |          |  |
| 209 | N            | Isotropic = | 88.5141 | Anisotropy = | 104.0504 |          |  |
|     | XX=          | 152.0435    | YX=     | 22.6097      | ZX=      | -13.9547 |  |
|     | XY=          | 20.4442     | YY=     | 54.8132      | ZY=      | 8.3337   |  |
|     | XZ=          | -13.1625    | YZ=     | 11.5796      | ZZ=      | 58.6856  |  |
|     | Eigenvalues: | 40.8581     | 66.8033 | 157.8810     |          |          |  |
| 210 | H            | Isotropic = | 21.5288 | Anisotropy = | 16.6425  |          |  |
|     | XX=          | 12.0988     | YX=     | -0.8264      | ZX=      | 0.9825   |  |
|     | XY=          | -1.0578     | YY=     | 28.4099      | ZY=      | -5.7072  |  |
|     | XZ=          | 0.6670      | YZ=     | -6.1342      | ZZ=      | 24.0777  |  |
|     | Eigenvalues: | 12.0210     | 19.9416 | 32.6238      |          |          |  |
| 211 | N            | Isotropic = | 88.0061 | Anisotropy = | 106.8567 |          |  |
|     | XX=          | 134.5168    | YX=     | 22.1129      | ZX=      | -44.1321 |  |
|     | XY=          | 19.6468     | YY=     | 54.7520      | ZY=      | 0.0337   |  |
|     | XZ=          | -39.8988    | YZ=     | 3.4507       | ZZ=      | 74.7496  |  |
|     | Eigenvalues: | 41.4055     | 63.3689 | 159.2439     |          |          |  |
| 212 | H            | Isotropic = | 21.4802 | Anisotropy = | 18.9652  |          |  |
|     | XX=          | 13.4599     | YX=     | -5.3926      | ZX=      | 5.0021   |  |
|     | XY=          | -4.3161     | YY=     | 28.9132      | ZY=      | -5.3092  |  |
|     | XZ=          | 4.5497      | YZ=     | -5.8001      | ZZ=      | 22.0674  |  |
|     | Eigenvalues: | 10.9997     | 19.3171 | 34.1236      |          |          |  |
| 213 | N            | Isotropic = | 87.3043 | Anisotropy = | 109.1620 |          |  |
|     | XX=          | 67.5882     | YX=     | -7.3373      | ZX=      | -29.1407 |  |
|     | XY=          | -10.3546    | YY=     | 72.0343      | ZY=      | 44.0811  |  |
|     | XZ=          | -32.1195    | YZ=     | 48.2554      | ZZ=      | 122.2904 |  |
|     | Eigenvalues: | 40.9767     | 60.8573 | 160.0789     |          |          |  |
| 214 | H            | Isotropic = | 21.2049 | Anisotropy = | 19.5911  |          |  |
|     | XX=          | 20.2427     | YX=     | -3.8737      | ZX=      | 3.9333   |  |
|     | XY=          | -3.2427     | YY=     | 28.0988      | ZY=      | -8.1065  |  |
|     | XZ=          | 3.9753      | YZ=     | -9.2884      | ZZ=      | 15.2732  |  |
|     | Eigenvalues: | 10.4527     | 18.8964 | 34.2656      |          |          |  |
| 215 | C            | Isotropic = | 64.8843 | Anisotropy = | 126.2637 |          |  |
|     | XX=          | 51.0707     | YX=     | 52.4301      | ZX=      | 28.4131  |  |
|     | XY=          | 48.9370     | YY=     | 22.1148      | ZY=      | 29.2462  |  |
|     | XZ=          | 26.3946     | YZ=     | 32.0143      | ZZ=      | 121.4674 |  |
|     | Eigenvalues: | -16.6330    | 62.2258 | 149.0601     |          |          |  |
| 216 | C            | Isotropic = | 61.2066 | Anisotropy = | 151.1178 |          |  |

|     |              |             |         |              |          |          |
|-----|--------------|-------------|---------|--------------|----------|----------|
|     | XX=          | 26.1234     | YX=     | 26.6085      | ZX=      | 65.6610  |
|     | XY=          | 11.5067     | YY=     | 43.5547      | ZY=      | 43.2479  |
|     | XZ=          | 60.5987     | YZ=     | 31.9976      | ZZ=      | 113.9417 |
|     | Eigenvalues: | -6.8734     | 28.5414 | 161.9518     |          |          |
| 217 | C            | Isotropic = | 42.0449 | Anisotropy = | 96.6865  |          |
|     | XX=          | 50.8782     | YX=     | -12.9550     | ZX=      | 31.5813  |
|     | XY=          | -12.4429    | YY=     | 2.7011       | ZY=      | 48.7298  |
|     | XZ=          | 27.3994     | YZ=     | 50.7066      | ZZ=      | 72.5552  |
|     | Eigenvalues: | -30.9905    | 50.6225 | 106.5025     |          |          |
| 218 | C            | Isotropic = | 74.8693 | Anisotropy = | 131.0618 |          |
|     | XX=          | 53.8060     | YX=     | 40.7375      | ZX=      | 34.0506  |
|     | XY=          | 37.4727     | YY=     | 43.0099      | ZY=      | 35.5040  |
|     | XZ=          | 30.7943     | YZ=     | 43.1472      | ZZ=      | 127.7918 |
|     | Eigenvalues: | 8.1399      | 54.2241 | 162.2438     |          |          |
| 219 | C            | Isotropic = | 42.4112 | Anisotropy = | 95.9156  |          |
|     | XX=          | -3.8349     | YX=     | 14.3085      | ZX=      | 46.6164  |
|     | XY=          | 11.2872     | YY=     | 59.1194      | ZY=      | 15.0060  |
|     | XZ=          | 54.1659     | YZ=     | 18.8858      | ZZ=      | 71.9490  |
|     | Eigenvalues: | -29.1687    | 50.0473 | 106.3549     |          |          |
| 220 | C            | Isotropic = | 62.0884 | Anisotropy = | 152.8635 |          |
|     | XX=          | 49.9487     | YX=     | 5.2869       | ZX=      | 56.2684  |
|     | XY=          | 20.1219     | YY=     | 25.5134      | ZY=      | 48.1468  |
|     | XZ=          | 54.6308     | YZ=     | 59.4332      | ZZ=      | 110.8033 |
|     | Eigenvalues: | -5.2811     | 27.5490 | 163.9975     |          |          |
| 221 | C            | Isotropic = | 61.8068 | Anisotropy = | 152.5349 |          |
|     | XX=          | 25.2521     | YX=     | 64.0283      | ZX=      | -15.5701 |
|     | XY=          | 54.3293     | YY=     | 129.2041     | ZY=      | -30.6786 |
|     | XZ=          | -28.2533    | YZ=     | -18.5722     | ZZ=      | 30.9642  |
|     | Eigenvalues: | -4.7855     | 26.7091 | 163.4967     |          |          |
| 222 | C            | Isotropic = | 63.7200 | Anisotropy = | 129.2133 |          |
|     | XX=          | 45.8627     | YX=     | 54.0662      | ZX=      | 24.3764  |
|     | XY=          | 50.6533     | YY=     | 117.3625     | ZY=      | -37.2095 |
|     | XZ=          | 24.0255     | YZ=     | -40.5965     | ZZ=      | 27.9347  |
|     | Eigenvalues: | -18.2588    | 59.5565 | 149.8622     |          |          |
| 223 | C            | Isotropic = | 61.5844 | Anisotropy = | 153.2047 |          |
|     | XX=          | 49.0443     | YX=     | 46.4350      | ZX=      | -29.1247 |
|     | XY=          | 55.4389     | YY=     | 131.6895     | ZY=      | -21.3257 |
|     | XZ=          | -16.9610    | YZ=     | -34.5884     | ZZ=      | 4.0194   |
|     | Eigenvalues: | -6.1000     | 27.1324 | 163.7209     |          |          |
| 224 | C            | Isotropic = | 41.9773 | Anisotropy = | 95.9046  |          |
|     | XX=          | -4.7467     | YX=     | 46.5793      | ZX=      | -18.3244 |
|     | XY=          | 47.6394     | YY=     | 83.8504      | ZY=      | -0.4796  |
|     | XZ=          | -25.1094    | YZ=     | -2.0157      | ZZ=      | 46.8280  |
|     | Eigenvalues: | -30.0732    | 50.0913 | 105.9137     |          |          |
| 225 | C            | Isotropic = | 75.9951 | Anisotropy = | 130.3573 |          |
|     | XX=          | 54.1189     | YX=     | 51.6115      | ZX=      | 13.0892  |
|     | XY=          | 45.2759     | YY=     | 136.3979     | ZY=      | -26.9425 |
|     | XZ=          | 11.1727     | YZ=     | -33.3205     | ZZ=      | 37.4686  |
|     | Eigenvalues: | 9.2362      | 55.8492 | 162.9000     |          |          |
| 226 | C            | Isotropic = | 42.2216 | Anisotropy = | 94.9645  |          |
|     | XX=          | 51.5254     | YX=     | 17.7379      | ZX=      | -27.7442 |
|     | XY=          | 14.5945     | YY=     | 94.4264      | ZY=      | -19.2716 |
|     | XZ=          | -22.4131    | YZ=     | -18.9717     | ZZ=      | -19.2871 |
|     | Eigenvalues: | -28.7710    | 49.9044 | 105.5312     |          |          |

227 C Isotropic = 74.2387 Anisotropy = 131.2398  
 XX= 97.2202 YX= -29.8477 ZX= -49.7282  
 XY= -30.2579 YY= 17.5007 ZY= 21.7318  
 XZ= -49.6667 YZ= 21.6819 ZZ= 107.9953  
 Eigenvalues: 7.1185 53.8657 161.7319

228 C Isotropic = 41.2940 Anisotropy = 96.7713  
 XX= 54.3125 YX= 15.2680 ZX= -50.4049  
 XY= 11.6291 YY= 18.3247 ZY= 38.5317  
 XZ= -45.5382 YZ= 44.1160 ZZ= 51.2449  
 Eigenvalues: -29.2551 47.3290 105.8082

229 C Isotropic = 62.5296 Anisotropy = 153.7000  
 XX= 66.5899 YX= -34.8934 ZX= -82.9051  
 XY= -18.3036 YY= 31.3006 ZY= 23.4596  
 XZ= -76.3261 YZ= 7.7179 ZZ= 89.6983  
 Eigenvalues: -5.4223 28.0147 164.9963

230 C Isotropic = 62.5010 Anisotropy = 131.0571  
 XX= 91.6746 YX= -38.8559 ZX= -41.5316  
 XY= -35.5432 YY= -8.1997 ZY= 20.1043  
 XZ= -40.3266 YZ= 23.3020 ZZ= 104.0282  
 Eigenvalues: -21.0822 58.7127 149.8724

231 C Isotropic = 62.8259 Anisotropy = 153.4143  
 XX= 86.5027 YX= -4.8419 ZX= -72.8384  
 XY= -19.5699 YY= 24.5453 ZY= 25.4320  
 XZ= -78.1088 YZ= 42.9465 ZZ= 77.4297  
 Eigenvalues: -5.2964 28.6720 165.1021

232 C Isotropic = 41.3883 Anisotropy = 96.3946  
 XX= 35.3885 YX= -35.1490 ZX= -56.0293  
 XY= -29.1971 YY= 40.2031 ZY= -5.1106  
 XZ= -61.3219 YZ= -8.1401 ZZ= 48.5732  
 Eigenvalues: -29.0712 47.5846 105.6513

233 C Isotropic = 42.0999 Anisotropy = 97.0281  
 XX= 45.4977 YX= -65.6673 ZX= 16.0832  
 XY= -64.8797 YY= 26.5999 ZY= -2.4957  
 XZ= 20.7808 YZ= -3.0435 ZZ= 54.2022  
 Eigenvalues: -31.0963 50.6108 106.7854

234 C Isotropic = 61.1818 Anisotropy = 151.7790  
 XX= 89.5552 YX= -52.7894 ZX= 50.5405  
 XY= -64.2630 YY= 74.6471 ZY= -18.4590  
 XZ= 50.0016 YZ= -33.4828 ZZ= 19.3432  
 Eigenvalues: -7.2001 28.3778 162.3678

235 C Isotropic = 65.1561 Anisotropy = 126.0875  
 XX= 102.7067 YX= -49.3099 ZX= 8.6504  
 XY= -47.0411 YY= 62.8914 ZY= -53.6315  
 XZ= 10.0234 YZ= -57.8415 ZZ= 29.8702  
 Eigenvalues: -16.1847 62.4386 149.2144

236 C Isotropic = 62.0648 Anisotropy = 152.6754  
 XX= 79.7222 YX= -79.5710 ZX= 35.3881  
 XY= -69.0788 YY= 62.4805 ZY= -32.8698  
 XZ= 42.2197 YZ= -19.2316 ZZ= 43.9917  
 Eigenvalues: -4.8875 27.2335 163.8485

237 C Isotropic = 42.5346 Anisotropy = 95.2229  
 XX= 59.5912 YX= -29.0395 ZX= 47.9885  
 XY= -23.7985 YY= 73.5624 ZY= -8.3674  
 XZ= 41.6524 YZ= -9.6054 ZZ= -5.5500



Eigenvalues: -28.5511 50.1383 106.0165  
 238 C Isotropic = 74.9658 Anisotropy = 130.9378  
 XX= 104.9210 YX= -58.5779 ZX= 13.2413  
 XY= -51.6960 YY= 81.9948 ZY= -40.1984  
 XZ= 17.0965 YZ= -45.1026 ZZ= 37.9815  
 Eigenvalues: 8.2630 54.3766 162.2577  
 239 C Isotropic = 156.2676 Anisotropy = 12.4244  
 XX= 164.4700 YX= 0.6043 ZX= 0.9414  
 XY= 1.1054 YY= 154.5346 ZY= 4.3563  
 XZ= -2.1769 YZ= 14.9003 ZZ= 149.7983  
 Eigenvalues: 142.2050 162.0473 164.5506  
 240 C Isotropic = 155.8452 Anisotropy = 13.1005  
 XX= 140.9147 YX= 4.8547 ZX= 2.2378  
 XY= -5.0863 YY= 162.5458 ZY= -1.2577  
 XZ= -2.2352 YZ= -0.7659 ZZ= 164.0752  
 Eigenvalues: 140.9141 162.0427 164.5789  
 241 C Isotropic = 156.1850 Anisotropy = 12.9896  
 XX= 164.6248 YX= 0.8000 ZX= -0.0666  
 XY= 0.1584 YY= 161.3894 ZY= 9.6662  
 XZ= 2.5607 YZ= -2.9759 ZZ= 142.5409  
 Eigenvalues: 141.9068 161.8035 164.8448  
 242 C Isotropic = 155.9048 Anisotropy = 12.8845  
 XX= 145.2979 YX= -12.4896 ZX= -6.7090  
 XY= -2.7319 YY= 158.8412 ZY= -2.1979  
 XZ= -0.8780 YZ= -2.1474 ZZ= 163.5752  
 Eigenvalues: 141.0421 162.1777 164.4944  
 243 O Isotropic = 186.9439 Anisotropy = 142.7615  
 XX= 135.0586 YX= -25.4617 ZX= 59.9053  
 XY= 21.1248 YY= 170.5568 ZY= -26.0618  
 XZ= 54.2196 YZ= -18.3390 ZZ= 255.2163  
 Eigenvalues: 111.5909 167.1225 282.1182  
 244 O Isotropic = 189.3976 Anisotropy = 143.3257  
 XX= 244.6135 YX= 36.9092 ZX= 39.6073  
 XY= 26.9539 YY= 134.2250 ZY= 45.5419  
 XZ= 55.6695 YZ= 19.5097 ZZ= 189.3543  
 Eigenvalues: 118.2568 164.9880 284.9481  
 245 O Isotropic = 190.2185 Anisotropy = 139.8592  
 XX= 243.9510 YX= 51.9908 ZX= 7.4301  
 XY= 59.0052 YY= 203.1832 ZY= -29.6116  
 XZ= -10.0243 YZ= -5.2050 ZZ= 123.5211  
 Eigenvalues: 118.7699 168.4276 283.4579  
 246 O Isotropic = 189.8282 Anisotropy = 139.6033  
 XX= 135.3647 YX= 26.9296 ZX= -20.8176  
 XY= 47.4869 YY= 215.2204 ZY= -59.2230  
 XZ= 1.3144 YZ= -57.3986 ZZ= 218.8995  
 Eigenvalues: 118.5668 168.0207 282.8971  
 247 O Isotropic = 190.5245 Anisotropy = 121.7121  
 XX= 168.1939 YX= -9.9858 ZX= -30.9856  
 XY= -34.1718 YY= 149.9301 ZY= -30.8938  
 XZ= -44.0851 YZ= -31.5287 ZZ= 253.4494  
 Eigenvalues: 118.5590 181.3485 271.6659  
 248 O Isotropic = 190.5531 Anisotropy = 120.1996  
 XX= 263.8493 YX= 11.3873 ZX= -28.8560  
 XY= 6.6066 YY= 128.8297 ZY= 34.1792

XZ= -20.9583 YZ= 8.9376 ZZ= 178.9804  
 Eigenvalues: 118.7358 182.2374 270.6862  
 249 O Isotropic = 186.3435 Anisotropy = 143.2516  
 XX= 253.1358 YX= -14.0542 ZX= 53.7303  
 XY= -7.6156 YY= 167.0744 ZY= -26.5666  
 XZ= 71.2518 YZ= 18.0725 ZZ= 138.8204  
 Eigenvalues: 111.2854 165.9006 281.8446  
 250 O Isotropic = 189.1599 Anisotropy = 143.5725  
 XX= 169.2079 YX= -35.4809 ZX= 39.2182  
 XY= -56.9575 YY= 170.9229 ZY= -56.2614  
 XZ= 15.6953 YZ= -61.3730 ZZ= 227.3490  
 Eigenvalues: 117.3636 165.2412 284.8749  
 251 C Isotropic = 50.4828 Anisotropy = 134.2493  
 XX= 106.6563 YX= 51.2833 ZX= 45.5082  
 XY= 44.4466 YY= 5.0810 ZY= -24.7356  
 XZ= 54.3341 YZ= -36.5334 ZZ= 39.7110  
 Eigenvalues: -43.0566 54.5226 139.9824  
 252 C Isotropic = 50.6868 Anisotropy = 134.4348  
 XX= 119.0413 YX= 44.4966 ZX= 31.8922  
 XY= 38.9565 YY= -32.8844 ZY= -18.5098  
 XZ= 28.7729 YZ= 6.1643 ZZ= 65.9035  
 Eigenvalues: -45.3015 57.0519 140.3100  
 253 N Isotropic = -57.2289 Anisotropy = 477.2527  
 XX= 192.1431 YX= 144.6305 ZX= 128.7980  
 XY= 118.3042 YY= -249.9276 ZY= -82.5786  
 XZ= 138.2853 YZ= -81.2808 ZZ= -113.9021  
 Eigenvalues: -347.3537 -85.2724 260.9396  
 254 C Isotropic = 38.4799 Anisotropy = 96.5537  
 XX= 91.4581 YX= 14.5573 ZX= 36.4158  
 XY= 20.1193 YY= 35.5620 ZY= -34.6780  
 XZ= 28.7407 YZ= -5.5307 ZZ= -11.5804  
 Eigenvalues: -30.0258 42.6164 102.8490  
 255 C Isotropic = 39.2760 Anisotropy = 97.9365  
 XX= 98.5393 YX= 3.3621 ZX= 8.0779  
 XY= 19.0081 YY= -17.8884 ZY= 45.1365  
 XZ= 22.3614 YZ= 6.9228 ZZ= 37.1772  
 Eigenvalues: -28.4302 41.6913 104.5671  
 256 N Isotropic = -45.8561 Anisotropy = 470.3946  
 XX= 188.5192 YX= 112.5208 ZX= 107.1507  
 XY= 161.6462 YY= -279.9030 ZY= -25.6847  
 XZ= 140.6376 YZ= -16.8021 ZZ= -46.1845  
 Eigenvalues: -327.9173 -77.3912 267.7403  
 257 N Isotropic = -56.8696 Anisotropy = 476.6778  
 XX= -98.1861 YX= 35.2930 ZX= 100.6784  
 XY= 36.5023 YY= -181.3283 ZY= -236.0192  
 XZ= 86.8375 YZ= -255.7672 ZZ= 108.9056  
 Eigenvalues: -346.6870 -84.8374 260.9156  
 258 C Isotropic = 50.6126 Anisotropy = 134.6876  
 XX= 61.3872 YX= -26.6845 ZX= 9.7380  
 XY= -4.3033 YY= -0.6363 ZY= -73.7581  
 XZ= 18.5893 YZ= -81.3803 ZZ= 91.0871  
 Eigenvalues: -45.2842 56.7178 140.4043  
 259 C Isotropic = 50.3152 Anisotropy = 134.6666  
 XX= 45.4338 YX= 20.9090 ZX= 45.1435

|     |              |             |          |              |          |           |
|-----|--------------|-------------|----------|--------------|----------|-----------|
|     | XY=          | 11.4135     | YY=      | 25.0821      | ZY=      | -74.1578  |
|     | XZ=          | 32.3794     | YZ=      | -79.3007     | ZZ=      | 80.4296   |
|     | Eigenvalues: | -43.4581    | 54.3107  | 140.0929     |          |           |
| 260 | N            | Isotropic = | -46.9632 | Anisotropy = | 470.8809 |           |
|     | XX=          | -59.5575    | YX=      | -42.6190     | ZX=      | 78.8726   |
|     | XY=          | -26.5112    | YY=      | -183.3171    | ZY=      | -277.1619 |
|     | XZ=          | 62.0720     | YZ=      | -225.1645    | ZZ=      | 101.9852  |
|     | Eigenvalues: | -329.6324   | -78.2145 | 266.9575     |          |           |
| 261 | C            | Isotropic = | 39.2218  | Anisotropy = | 98.0219  |           |
|     | XX=          | 22.8684     | YX=      | -18.4196     | ZX=      | 9.2177    |
|     | XY=          | -51.5547    | YY=      | 7.8610       | ZY=      | -47.7261  |
|     | XZ=          | -9.8042     | YZ=      | -28.4475     | ZZ=      | 86.9360   |
|     | Eigenvalues: | -28.6063    | 41.7020  | 104.5697     |          |           |
| 262 | C            | Isotropic = | 38.4740  | Anisotropy = | 96.3127  |           |
|     | XX=          | -4.2472     | YX=      | 10.0579      | ZX=      | 21.2847   |
|     | XY=          | 37.1159     | YY=      | 38.6381      | ZY=      | -36.9489  |
|     | XZ=          | 35.6473     | YZ=      | -33.1629     | ZZ=      | 81.0310   |
|     | Eigenvalues: | -29.9846    | 42.7241  | 102.6824     |          |           |
| 263 | N            | Isotropic = | -56.9030 | Anisotropy = | 477.8121 |           |
|     | XX=          | 220.3835    | YX=      | 143.0703     | ZX=      | 79.2812   |
|     | XY=          | 120.3592    | YY=      | -236.0163    | ZY=      | -97.1710  |
|     | XZ=          | 75.1418     | YZ=      | -106.0621    | ZZ=      | -155.0761 |
|     | Eigenvalues: | -345.9369   | -86.4104 | 261.6385     |          |           |
| 264 | C            | Isotropic = | 37.7549  | Anisotropy = | 97.1625  |           |
|     | XX=          | 93.9299     | YX=      | 20.7595      | ZX=      | 28.6303   |
|     | XY=          | 19.0263     | YY=      | 37.6209      | ZY=      | -34.3929  |
|     | XZ=          | 17.3549     | YZ=      | -5.0056      | ZZ=      | -18.2861  |
|     | Eigenvalues: | -30.8778    | 41.6126  | 102.5299     |          |           |
| 265 | C            | Isotropic = | 38.3722  | Anisotropy = | 95.9357  |           |
|     | XX=          | 94.3661     | YX=      | 33.7994      | ZX=      | -0.4925   |
|     | XY=          | 23.4157     | YY=      | -15.4356     | ZY=      | 37.4187   |
|     | XZ=          | 5.0738      | YZ=      | 8.7911       | ZZ=      | 36.1861   |
|     | Eigenvalues: | -29.7627    | 42.5500  | 102.3293     |          |           |
| 266 | N            | Isotropic = | -54.1085 | Anisotropy = | 474.2049 |           |
|     | XX=          | 221.2904    | YX=      | 145.4126     | ZX=      | 66.7309   |
|     | XY=          | 131.0232    | YY=      | -283.3881    | ZY=      | -62.2577  |
|     | XZ=          | 52.2625     | YZ=      | -51.2714     | ZZ=      | -100.2278 |
|     | Eigenvalues: | -339.3769   | -84.9768 | 262.0281     |          |           |
| 267 | C            | Isotropic = | 49.9599  | Anisotropy = | 134.4942 |           |
|     | XX=          | 129.5226    | YX=      | 34.6484      | ZX=      | 18.8454   |
|     | XY=          | 34.6544     | YY=      | 4.4874       | ZY=      | -37.1924  |
|     | XZ=          | 26.5754     | YZ=      | -49.8925     | ZZ=      | 15.8697   |
|     | Eigenvalues: | -43.4813    | 53.7383  | 139.6227     |          |           |
| 268 | C            | Isotropic = | 49.4963  | Anisotropy = | 135.8777 |           |
|     | XX=          | 130.0187    | YX=      | 35.9364      | ZX=      | 17.5532   |
|     | XY=          | 42.0556     | YY=      | -35.3038     | ZY=      | -26.7168  |
|     | XZ=          | 11.6494     | YZ=      | -6.9488      | ZZ=      | 53.7741   |
|     | Eigenvalues: | -47.8499    | 56.2575  | 140.0815     |          |           |
| 269 | N            | Isotropic = | -56.6271 | Anisotropy = | 477.1083 |           |
|     | XX=          | -121.0834   | YX=      | 78.8639      | ZX=      | 52.9712   |
|     | XY=          | 69.7744     | YY=      | -197.1703    | ZY=      | -215.4305 |
|     | XZ=          | 49.8078     | YZ=      | -238.8545    | ZZ=      | 148.3724  |
|     | Eigenvalues: | -345.4568   | -85.8696 | 261.4451     |          |           |
| 270 | C            | Isotropic = | 37.9717  | Anisotropy = | 96.9328  |           |

|     |              |             |          |              |          |           |
|-----|--------------|-------------|----------|--------------|----------|-----------|
|     | XX=          | -9.0470     | YX=      | 13.6104      | ZX=      | 11.3307   |
|     | XY=          | 39.7767     | YY=      | 39.3534      | ZY=      | -31.6321  |
|     | XZ=          | 27.6563     | YZ=      | -37.2182     | ZZ=      | 83.6087   |
|     | Eigenvalues: | -30.3023    | 41.6239  | 102.5936     |          |           |
| 271 | C            | Isotropic = | 38.2140  | Anisotropy = | 96.3491  |           |
|     | XX=          | 24.4883     | YX=      | -15.2478     | ZX=      | -5.6199   |
|     | XY=          | -41.5249    | YY=      | 11.8444      | ZY=      | -43.1460  |
|     | XZ=          | -18.4823    | YZ=      | -50.1972     | ZZ=      | 78.3092   |
|     | Eigenvalues: | -29.6873    | 41.8825  | 102.4467     |          |           |
| 272 | N            | Isotropic = | -54.2843 | Anisotropy = | 474.7054 |           |
|     | XX=          | -86.8211    | YX=      | 13.7771      | ZX=      | 14.1148   |
|     | XY=          | 21.6862     | YY=      | -220.0599    | ZY=      | -229.7308 |
|     | XZ=          | 26.6067     | YZ=      | -246.9027    | ZZ=      | 144.0283  |
|     | Eigenvalues: | -340.3584   | -84.6804 | 262.1860     |          |           |
| 273 | C            | Isotropic = | 49.7370  | Anisotropy = | 134.3832 |           |
|     | XX=          | 31.5388     | YX=      | 41.7856      | ZX=      | 23.8498   |
|     | XY=          | 31.1213     | YY=      | 7.8040       | ZY=      | -63.3812  |
|     | XZ=          | 14.4898     | YZ=      | -61.0263     | ZZ=      | 109.8683  |
|     | Eigenvalues: | -44.0338    | 53.9190  | 139.3258     |          |           |
| 274 | C            | Isotropic = | 49.6838  | Anisotropy = | 135.7745 |           |
|     | XX=          | 56.8791     | YX=      | -10.3440     | ZX=      | -2.0564   |
|     | XY=          | 7.2157      | YY=      | -15.4289     | ZY=      | -72.7859  |
|     | XZ=          | 8.0941      | YZ=      | -69.3030     | ZZ=      | 107.6012  |
|     | Eigenvalues: | -47.8897    | 56.7409  | 140.2001     |          |           |
| 275 | C            | Isotropic = | 30.8939  | Anisotropy = | 95.2522  |           |
|     | XX=          | 75.2799     | YX=      | 25.2284      | ZX=      | 24.7125   |
|     | XY=          | 31.9058     | YY=      | -33.2072     | ZY=      | -5.7520   |
|     | XZ=          | 23.5608     | YZ=      | 0.8442       | ZZ=      | 50.6090   |
|     | Eigenvalues: | -41.0344    | 39.3206  | 94.3953      |          |           |
| 276 | C            | Isotropic = | 35.7387  | Anisotropy = | 82.1765  |           |
|     | XX=          | 65.4070     | YX=      | 36.4544      | ZX=      | 38.4689   |
|     | XY=          | 29.4538     | YY=      | 15.1250      | ZY=      | -35.6173  |
|     | XZ=          | 40.0405     | YZ=      | -49.5085     | ZZ=      | 26.6841   |
|     | Eigenvalues: | -45.3290    | 62.0221  | 90.5231      |          |           |
| 277 | C            | Isotropic = | 35.3905  | Anisotropy = | 82.9317  |           |
|     | XX=          | 39.0942     | YX=      | 36.9286      | ZX=      | 40.1521   |
|     | XY=          | 24.0568     | YY=      | 17.6503      | ZY=      | -48.0862  |
|     | XZ=          | 33.8667     | YZ=      | -52.5354     | ZZ=      | 49.4271   |
|     | Eigenvalues: | -45.1764    | 60.6697  | 90.6783      |          |           |
| 278 | C            | Isotropic = | 31.0393  | Anisotropy = | 94.9890  |           |
|     | XX=          | 45.8473     | YX=      | -19.2013     | ZX=      | 9.7311    |
|     | XY=          | -12.5505    | YY=      | -9.5235      | ZY=      | -57.8941  |
|     | XZ=          | 13.3342     | YZ=      | -51.8190     | ZZ=      | 56.7941   |
|     | Eigenvalues: | -41.2514    | 40.0041  | 94.3653      |          |           |
| 279 | C            | Isotropic = | 30.6091  | Anisotropy = | 97.5870  |           |
|     | XX=          | 88.4296     | YX=      | 28.5795      | ZX=      | 9.7435    |
|     | XY=          | 28.6505     | YY=      | -33.2185     | ZY=      | -14.9197  |
|     | XZ=          | 9.1913      | YZ=      | -5.7197      | ZZ=      | 36.6162   |
|     | Eigenvalues: | -41.5073    | 37.6675  | 95.6671      |          |           |
| 280 | C            | Isotropic = | 34.8090  | Anisotropy = | 81.8639  |           |
|     | XX=          | 82.3550     | YX=      | 22.2495      | ZX=      | 18.7748   |
|     | XY=          | 21.3901     | YY=      | 15.6848      | ZY=      | -41.7531  |
|     | XZ=          | 21.2986     | YZ=      | -57.7511     | ZZ=      | 6.3873    |
|     | Eigenvalues: | -45.7332    | 60.7753  | 89.3850      |          |           |

281 C Isotropic = 30.7094 Anisotropy = 97.5748  
XX= 37.7890 YX= -8.5724 ZX= -0.6357  
XY= 0.7033 YY= -17.9513 ZY= -51.4323  
XZ= 2.0441 YZ= -51.6498 ZZ= 72.2905  
Eigenvalues: -41.4681 37.8370 95.7592  
282 C Isotropic = 34.3308 Anisotropy = 83.0802  
XX= 24.6116 YX= 51.6321 ZX= 24.8880  
XY= 36.5895 YY= 7.4651 ZY= -39.3202  
XZ= 19.0634 YZ= -39.2905 ZZ= 70.9157  
Eigenvalues: -45.8047 59.0795 89.7176  
283 O Isotropic = -80.9428 Anisotropy = 669.3700  
XX= 332.7108 YX= 100.7254 ZX= 88.7750  
XY= 99.9564 YY= -135.8123 ZY= 62.3946  
XZ= 88.0490 YZ= 52.4372 ZZ= -439.7269  
Eigenvalues: -456.5537 -151.5786 365.3039  
284 O Isotropic = -137.9553 Anisotropy = 761.3251  
XX= 334.8147 YX= 138.2357 ZX= 41.5685  
XY= 137.8340 YY= -363.8817 ZY= 193.9844  
XZ= 41.9583 YZ= 197.6683 ZZ= -384.7991  
Eigenvalues: -575.2611 -208.1996 369.5947  
285 O Isotropic = -86.6867 Anisotropy = 681.3161  
XX= -369.8426 YX= -93.6219 ZX= 246.7676  
XY= -107.0130 YY= -31.9111 ZY= -200.9121  
XZ= 250.5372 YZ= -199.5088 ZZ= 141.6936  
Eigenvalues: -471.6302 -155.9540 367.5240  
286 N Isotropic = 87.3043 Anisotropy = 109.1620  
XX= 67.5882 YX= -7.3373 ZX= 29.1407  
XY= -10.3546 YY= 72.0343 ZY= -44.0811  
XZ= 32.1195 YZ= -48.2554 ZZ= 122.2904  
Eigenvalues: 40.9767 60.8573 160.0789  
287 O Isotropic = -139.9314 Anisotropy = 767.3270  
XX= -411.7741 YX= -256.2667 ZX= 152.2171  
XY= -250.6581 YY= -206.8955 ZY= -220.4670  
XZ= 149.3407 YZ= -216.2330 ZZ= 198.8755  
Eigenvalues: -582.7285 -208.6855 371.6200  
288 O Isotropic = -83.4660 Anisotropy = 675.9819  
XX= 179.9668 YX= 68.0941 ZX= 328.7595  
XY= 69.1624 YY= -139.8068 ZY= 96.1978  
XZ= 322.5341 YZ= 84.6135 ZZ= -290.5580  
Eigenvalues: -464.8086 -152.7779 367.1886  
289 O Isotropic = -142.9333 Anisotropy = 770.6682  
XX= 236.3814 YX= 22.9916 ZX= 270.9574  
XY= 26.0514 YY= -385.6826 ZY= 214.6665  
XZ= 275.6706 YZ= 219.6737 ZZ= -279.4987  
Eigenvalues: -587.4839 -212.1615 370.8455  
290 O Isotropic = -82.6022 Anisotropy = 671.7886  
XX= -457.2549 YX= 10.9952 ZX= 37.5588  
XY= 0.8112 YY= -63.6325 ZY= -197.1655  
XZ= 35.3345 YZ= -197.4990 ZZ= 273.0807  
Eigenvalues: -459.7876 -153.2759 365.2568  
291 O Isotropic = -134.1912 Anisotropy = 756.2705  
XX= -455.3811 YX= -163.0514 ZX= -52.0152  
XY= -158.6548 YY= -199.9095 ZY= -257.7067  
XZ= -52.8196 YZ= -258.1599 ZZ= 252.7171

|     |              |             |           |              |         |
|-----|--------------|-------------|-----------|--------------|---------|
|     | Eigenvalues: | -568.1947   | -204.3679 | 369.9891     |         |
| 292 | H            | Isotropic = | 24.9377   | Anisotropy = | 8.3789  |
|     |              | XX=         | 26.4488   | YX=          | 2.5823  |
|     |              |             |           | ZX=          | -2.8453 |
|     |              | XY=         | 1.7720    | YY=          | 23.8367 |
|     |              |             |           | ZY=          | -3.4384 |
|     |              | XZ=         | -3.4833   | YZ=          | -2.0230 |
|     |              |             |           | ZZ=          | 24.5278 |
|     | Eigenvalues: | 21.3455     | 22.9440   | 30.5237      |         |
| 293 | H            | Isotropic = | 23.8875   | Anisotropy = | 7.4513  |
|     |              | XX=         | 25.0930   | YX=          | 0.8854  |
|     |              |             |           | ZX=          | -5.0903 |
|     |              | XY=         | 0.9362    | YY=          | 24.7979 |
|     |              |             |           | ZY=          | -1.8314 |
|     |              | XZ=         | -3.6455   | YZ=          | -1.6104 |
|     |              |             |           | ZZ=          | 21.7716 |
|     | Eigenvalues: | 18.6213     | 24.1862   | 28.8550      |         |
| 294 | H            | Isotropic = | 24.8728   | Anisotropy = | 8.7524  |
|     |              | XX=         | 26.5136   | YX=          | -0.5927 |
|     |              |             |           | ZX=          | 3.9909  |
|     |              | XY=         | -1.6654   | YY=          | 21.3455 |
|     |              |             |           | ZY=          | -0.4184 |
|     |              | XZ=         | 3.6939    | YZ=          | -1.4526 |
|     |              |             |           | ZZ=          | 26.7593 |
|     | Eigenvalues: | 21.1038     | 22.8068   | 30.7078      |         |
| 295 | H            | Isotropic = | 23.9456   | Anisotropy = | 7.6642  |
|     |              | XX=         | 25.0039   | YX=          | -2.9967 |
|     |              |             |           | ZX=          | 3.2276  |
|     |              | XY=         | -2.4997   | YY=          | 20.7826 |
|     |              |             |           | ZY=          | 0.6607  |
|     |              | XZ=         | 3.4669    | YZ=          | 1.4049  |
|     |              |             |           | ZZ=          | 26.0502 |
|     | Eigenvalues: | 18.5588     | 24.2229   | 29.0550      |         |
| 296 | H            | Isotropic = | 24.3773   | Anisotropy = | 7.4822  |
|     |              | XX=         | 24.4089   | YX=          | -0.0767 |
|     |              |             |           | ZX=          | 5.0016  |
|     |              | XY=         | -1.1280   | YY=          | 24.1741 |
|     |              |             |           | ZY=          | -0.0595 |
|     |              | XZ=         | 4.5109    | YZ=          | -1.0580 |
|     |              |             |           | ZZ=          | 24.5489 |
|     | Eigenvalues: | 19.7218     | 24.0446   | 29.3654      |         |
| 297 | H            | Isotropic = | 24.9287   | Anisotropy = | 8.9545  |
|     |              | XX=         | 26.2487   | YX=          | -0.7938 |
|     |              |             |           | ZX=          | 4.4615  |
|     |              | XY=         | 0.4574    | YY=          | 22.4715 |
|     |              |             |           | ZY=          | -2.3506 |
|     |              | XZ=         | 4.6009    | YZ=          | -1.0680 |
|     |              |             |           | ZZ=          | 26.0659 |
|     | Eigenvalues: | 20.8077     | 23.0800   | 30.8984      |         |
| 298 | H            | Isotropic = | 24.9405   | Anisotropy = | 8.2717  |
|     |              | XX=         | 25.9405   | YX=          | 2.5024  |
|     |              |             |           | ZX=          | -3.3007 |
|     |              | XY=         | 3.6020    | YY=          | 23.4785 |
|     |              |             |           | ZY=          | -1.4103 |
|     |              | XZ=         | -2.6299   | YZ=          | -2.3912 |
|     |              |             |           | ZZ=          | 25.4026 |
|     | Eigenvalues: | 21.4151     | 22.9515   | 30.4550      |         |
| 299 | H            | Isotropic = | 23.9207   | Anisotropy = | 7.4630  |
|     |              | XX=         | 23.1704   | YX=          | 2.6479  |
|     |              |             |           | ZX=          | -3.3961 |
|     |              | XY=         | 3.3065    | YY=          | 23.8608 |
|     |              |             |           | ZY=          | -0.2563 |
|     |              | XZ=         | -4.6776   | YZ=          | 0.1652  |
|     |              |             |           | ZZ=          | 24.7307 |
|     | Eigenvalues: | 18.7483     | 24.1178   | 28.8960      |         |
| 300 | H            | Isotropic = | 27.1287   | Anisotropy = | 3.6014  |
|     |              | XX=         | 24.8562   | YX=          | -0.2153 |
|     |              |             |           | ZX=          | -0.1668 |
|     |              | XY=         | -0.1643   | YY=          | 27.6712 |
|     |              |             |           | ZY=          | -0.5433 |
|     |              | XZ=         | -0.4816   | YZ=          | -1.6741 |
|     |              |             |           | ZZ=          | 28.8586 |
|     | Eigenvalues: | 24.8001     | 27.0563   | 29.5296      |         |
| 301 | H            | Isotropic = | 28.9237   | Anisotropy = | 6.8514  |
|     |              | XX=         | 27.3882   | YX=          | -1.1932 |
|     |              |             |           | ZX=          | -0.3643 |
|     |              | XY=         | -0.6363   | YY=          | 32.0120 |
|     |              |             |           | ZY=          | 1.0665  |
|     |              | XZ=         | -1.0587   | YZ=          | 4.4136  |
|     |              |             |           | ZZ=          | 27.3709 |
|     | Eigenvalues: | 26.0426     | 27.2371   | 33.4913      |         |
| 302 | H            | Isotropic = | 28.9315   | Anisotropy = | 6.7024  |
|     |              | XX=         | 26.6142   | YX=          | 0.1378  |
|     |              |             |           | ZX=          | -0.0103 |
|     |              | XY=         | -2.9201   | YY=          | 31.9227 |
|     |              |             |           | ZY=          | 2.3493  |

|     |              |             |         |              |          |         |  |
|-----|--------------|-------------|---------|--------------|----------|---------|--|
|     | XZ=          | -1.4145     | YZ=     | 2.2736       | ZZ=      | 28.2575 |  |
|     | Eigenvalues: | 26.2530     | 27.1417 | 33.3997      |          |         |  |
| 303 | H            | Isotropic = | 27.0176 | Anisotropy = | 3.3986   |         |  |
|     | XX=          | 29.2635     | YX=     | -0.1920      | ZX=      | -0.1479 |  |
|     | XY=          | 0.5947      | YY=     | 26.6685      | ZY=      | 0.9882  |  |
|     | XZ=          | 0.2419      | YZ=     | 1.1142       | ZZ=      | 25.1208 |  |
|     | Eigenvalues: | 24.5888     | 27.1806 | 29.2834      |          |         |  |
| 304 | H            | Isotropic = | 28.9167 | Anisotropy = | 6.6700   |         |  |
|     | XX=          | 27.5069     | YX=     | -1.1548      | ZX=      | -1.0428 |  |
|     | XY=          | -1.5432     | YY=     | 31.8802      | ZY=      | 4.1255  |  |
|     | XZ=          | -0.2928     | YZ=     | 0.8378       | ZZ=      | 27.3630 |  |
|     | Eigenvalues: | 26.2613     | 27.1254 | 33.3633      |          |         |  |
| 305 | H            | Isotropic = | 26.9797 | Anisotropy = | 3.5669   |         |  |
|     | XX=          | 24.6201     | YX=     | -0.7685      | ZX=      | -0.2786 |  |
|     | XY=          | -0.5022     | YY=     | 27.2039      | ZY=      | -1.1571 |  |
|     | XZ=          | -0.6166     | YZ=     | -0.2500      | ZZ=      | 29.1152 |  |
|     | Eigenvalues: | 24.3954     | 27.1862 | 29.3577      |          |         |  |
| 306 | H            | Isotropic = | 27.1016 | Anisotropy = | 3.5995   |         |  |
|     | XX=          | 29.2651     | YX=     | 1.3612       | ZX=      | 0.0595  |  |
|     | XY=          | 0.0823      | YY=     | 27.0888      | ZY=      | 0.7349  |  |
|     | XZ=          | 0.1096      | YZ=     | 0.6771       | ZZ=      | 24.9508 |  |
|     | Eigenvalues: | 24.7350     | 27.0685 | 29.5012      |          |         |  |
| 307 | H            | Isotropic = | 28.9018 | Anisotropy = | 6.8614   |         |  |
|     | XX=          | 26.5692     | YX=     | -2.9725      | ZX=      | -1.5245 |  |
|     | XY=          | 0.1454      | YY=     | 32.2830      | ZY=      | 1.9176  |  |
|     | XZ=          | -0.1455     | YZ=     | 2.2087       | ZZ=      | 27.8534 |  |
|     | Eigenvalues: | 26.1195     | 27.1099 | 33.4761      |          |         |  |
| 308 | H            | Isotropic = | 21.2049 | Anisotropy = | 19.5911  |         |  |
|     | XX=          | 20.2427     | YX=     | -3.8737      | ZX=      | -3.9333 |  |
|     | XY=          | -3.2427     | YY=     | 28.0988      | ZY=      | 8.1065  |  |
|     | XZ=          | -3.9753     | YZ=     | 9.2884       | ZZ=      | 15.2732 |  |
|     | Eigenvalues: | 10.4527     | 18.8964 | 34.2656      |          |         |  |
| 309 | N            | Isotropic = | 88.0061 | Anisotropy = | 106.8567 |         |  |
|     | XX=          | 134.5168    | YX=     | 22.1129      | ZX=      | 44.1321 |  |
|     | XY=          | 19.6468     | YY=     | 54.7520      | ZY=      | -0.0337 |  |
|     | XZ=          | 39.8988     | YZ=     | -3.4507      | ZZ=      | 74.7496 |  |
|     | Eigenvalues: | 41.4055     | 63.3689 | 159.2439     |          |         |  |
| 310 | H            | Isotropic = | 21.4802 | Anisotropy = | 18.9652  |         |  |
|     | XX=          | 13.4599     | YX=     | -5.3926      | ZX=      | -5.0021 |  |
|     | XY=          | -4.3161     | YY=     | 28.9132      | ZY=      | 5.3092  |  |
|     | XZ=          | -4.5497     | YZ=     | 5.8001       | ZZ=      | 22.0674 |  |
|     | Eigenvalues: | 10.9997     | 19.3171 | 34.1236      |          |         |  |
| 311 | N            | Isotropic = | 88.5141 | Anisotropy = | 104.0504 |         |  |
|     | XX=          | 152.0435    | YX=     | 22.6097      | ZX=      | 13.9547 |  |
|     | XY=          | 20.4442     | YY=     | 54.8132      | ZY=      | -8.3337 |  |
|     | XZ=          | 13.1625     | YZ=     | -11.5796     | ZZ=      | 58.6856 |  |
|     | Eigenvalues: | 40.8581     | 66.8033 | 157.8810     |          |         |  |
| 312 | H            | Isotropic = | 21.5288 | Anisotropy = | 16.6425  |         |  |
|     | XX=          | 12.0988     | YX=     | -0.8264      | ZX=      | -0.9825 |  |
|     | XY=          | -1.0578     | YY=     | 28.4099      | ZY=      | 5.7072  |  |
|     | XZ=          | -0.6670     | YZ=     | 6.1342       | ZZ=      | 24.0777 |  |
|     | Eigenvalues: | 12.0210     | 19.9416 | 32.6238      |          |         |  |
| 313 | N            | Isotropic = | 88.7035 | Anisotropy = | 103.6433 |         |  |
|     | XX=          | 62.8231     | YX=     | 9.5283       | ZX=      | 6.9242  |  |

|     |              |             |         |              |         |          |
|-----|--------------|-------------|---------|--------------|---------|----------|
|     | XY=          | 6.2455      | YY=     | 63.8309      | ZY=     | -40.1349 |
|     | XZ=          | 6.8779      | YZ=     | -42.6153     | ZZ=     | 139.4565 |
|     | Eigenvalues: | 40.9937     | 67.3178 | 157.7991     |         |          |
| 314 | H            | Isotropic = | 21.5550 | Anisotropy = | 16.7545 |          |
|     | XX=          | 21.9560     | YX=     | -4.8075      | ZX=     | -1.0473  |
|     | XY=          | -4.3130     | YY=     | 29.5998      | ZY=     | 4.5082   |
|     | XZ=          | -1.1980     | YZ=     | 4.1900       | ZZ=     | 13.1092  |
|     | Eigenvalues: | 12.0325     | 19.9079 | 32.7247      |         |          |

cartesians coordinates

|   |   |             |             |             |
|---|---|-------------|-------------|-------------|
| 0 | 1 |             |             |             |
| H |   | 4.71253100  | 4.56614900  | 6.72987500  |
| C |   | 4.90157000  | 4.52230100  | 5.65491600  |
| C |   | 4.50707000  | 5.83817400  | 4.98914400  |
| C |   | 4.01119100  | 3.47231800  | 4.99109500  |
| H |   | 5.95624200  | 4.30351400  | 5.47374600  |
| H |   | 5.08009000  | 6.68156800  | 5.38048700  |
| H |   | 4.19741300  | 2.47152500  | 5.38660200  |
| N |   | 4.32629000  | 3.44675200  | 3.56568700  |
| N |   | 4.80077500  | 5.73216800  | 3.56316700  |
| H |   | 4.77844600  | 6.59323200  | 3.01494700  |
| N |   | 3.09890100  | 6.09184200  | 5.28457900  |
| H |   | 2.73862700  | 7.02572900  | 5.08328800  |
| N |   | 2.61950100  | 3.80873900  | 5.28693100  |
| H |   | 1.90091800  | 3.07383400  | 5.28129000  |
| C |   | 2.16573200  | 5.09087200  | 5.30998300  |
| C |   | 4.59527100  | 4.57634700  | 2.85651600  |
| O |   | 4.69480700  | 4.55536700  | 1.60726800  |
| O |   | 0.94119500  | 5.34933400  | 5.39646100  |
| H |   | 4.16533600  | 2.58999300  | 3.01785300  |
| H |   | -5.23286600 | -0.64028300 | -1.77136900 |
| C |   | -4.18509500 | -0.87146600 | -1.97530500 |
| C |   | -3.79462800 | -2.21514100 | -1.35929200 |
| C |   | -3.27457600 | 0.14959200  | -1.29195400 |
| H |   | -4.01520200 | -0.87975400 | -3.05427400 |
| H |   | -4.37601600 | -3.04773400 | -1.76055800 |
| H |   | -3.44931900 | 1.16259300  | -1.66103600 |
| N |   | -1.88584800 | -0.20293400 | -1.59002200 |
| N |   | -2.39168900 | -2.47044500 | -1.68617100 |
| H |   | -2.08509600 | -3.41507900 | -1.90786700 |
| N |   | -4.04585500 | -2.14608800 | 0.07787600  |
| H |   | -4.21635300 | -3.00640400 | 0.60363900  |
| N |   | -3.57456700 | 0.13145300  | 0.13628600  |
| H |   | -3.45346000 | 0.97823100  | 0.69824700  |
| C |   | -3.85802900 | -1.01295000 | 0.81445600  |
| C |   | -1.45629800 | -1.48101700 | -1.74768300 |
| O |   | -0.24262700 | -1.73667400 | -1.95592300 |
| O |   | -3.97319100 | -1.02071000 | 2.06653100  |
| H |   | -1.16187100 | 0.51982100  | -1.64681000 |
| H |   | -3.11609600 | 2.49883900  | 6.82626400  |



|   |             |             |             |
|---|-------------|-------------|-------------|
| C | -3.34931700 | 2.54316900  | 5.76000600  |
| C | -2.96329600 | 1.23019400  | 5.07591400  |
| C | -2.49888100 | 3.60522200  | 5.06284800  |
| H | -4.41256600 | 2.75338500  | 5.62325100  |
| H | -3.52013400 | 0.38338900  | 5.48435800  |
| H | -2.67113700 | 4.60889100  | 5.45643000  |
| N | -2.87764000 | 3.62362300  | 3.65055400  |
| N | -3.30002800 | 1.33369100  | 3.65852800  |
| H | -3.49482400 | 0.48863000  | 3.10768100  |
| N | -1.54923200 | 0.98826400  | 5.32953200  |
| H | -1.19004200 | 0.02751300  | 5.30171500  |
| N | -1.09442300 | 3.27255100  | 5.28309500  |
| H | -0.38646800 | 4.01172500  | 5.26054000  |
| C | -0.62663100 | 1.99227100  | 5.32648000  |
| C | -3.20898800 | 2.49723200  | 2.95894500  |
| O | -3.44371600 | 2.52765100  | 1.72655100  |
| O | 0.60167800  | 1.74673200  | 5.39839500  |
| H | -2.91691100 | 4.50610700  | 3.14372500  |
| H | 4.01520200  | 0.87975400  | -3.05427400 |
| C | 4.18509500  | 0.87146600  | -1.97530500 |
| C | 3.27457600  | -0.14959200 | -1.29195400 |
| C | 3.79462800  | 2.21514100  | -1.35929200 |
| H | 5.23286600  | 0.64028300  | -1.77136900 |
| H | 3.44931900  | -1.16259300 | -1.66103600 |
| H | 4.37601600  | 3.04773400  | -1.76055800 |
| N | 4.04585500  | 2.14608800  | 0.07787600  |
| N | 3.57456700  | -0.13145300 | 0.13628600  |
| H | 3.45346000  | -0.97823100 | 0.69824700  |
| N | 1.88584800  | 0.20293400  | -1.59002200 |
| H | 1.16187100  | -0.51982100 | -1.64681000 |
| N | 2.39168900  | 2.47044500  | -1.68617100 |
| H | 2.08509600  | 3.41507900  | -1.90786700 |
| C | 1.45629800  | 1.48101700  | -1.74768300 |
| C | 3.85802900  | 1.01295000  | 0.81445600  |
| O | 3.97319100  | 1.02071000  | 2.06653100  |
| O | 0.24262700  | 1.73667400  | -1.95592300 |
| H | 4.21635300  | 3.00640400  | 0.60363900  |
| H | 4.41256600  | -2.75338500 | 5.62325100  |
| C | 3.34931700  | -2.54316900 | 5.76000600  |
| C | 2.49888100  | -3.60522200 | 5.06284800  |
| C | 2.96329600  | -1.23019400 | 5.07591400  |
| H | 3.11609600  | -2.49883900 | 6.82626400  |
| H | 2.67113700  | -4.60889100 | 5.45643000  |
| H | 3.52013400  | -0.38338900 | 5.48435800  |
| N | 1.54923200  | -0.98826400 | 5.32953200  |
| N | 1.09442300  | -3.27255100 | 5.28309500  |
| H | 0.38646800  | -4.01172500 | 5.26054000  |
| N | 2.87764000  | -3.62362300 | 3.65055400  |
| H | 2.91691100  | -4.50610700 | 3.14372500  |
| N | 3.30002800  | -1.33369100 | 3.65852800  |
| H | 3.49482400  | -0.48863000 | 3.10768100  |
| C | 3.20898800  | -2.49723200 | 2.95894500  |
| C | 0.62663100  | -1.99227100 | 5.32648000  |
| O | -0.60167800 | -1.74673200 | 5.39839500  |

|   |             |             |             |
|---|-------------|-------------|-------------|
| O | 3.44371600  | -2.52765100 | 1.72655100  |
| H | 1.19004200  | -0.02751300 | 5.30171500  |
| H | -5.95624200 | -4.30351400 | 5.47374600  |
| C | -4.90157000 | -4.52230100 | 5.65491600  |
| C | -4.01119100 | -3.47231800 | 4.99109500  |
| C | -4.50707000 | -5.83817400 | 4.98914400  |
| H | -4.71253100 | -4.56614900 | 6.72987500  |
| H | -4.19741300 | -2.47152500 | 5.38660200  |
| H | -5.08009000 | -6.68156800 | 5.38048700  |
| N | -3.09890100 | -6.09184200 | 5.28457900  |
| N | -2.61950100 | -3.80873900 | 5.28693100  |
| H | -1.90091800 | -3.07383400 | 5.28129000  |
| N | -4.32629000 | -3.44675200 | 3.56568700  |
| H | -4.16533600 | -2.58999300 | 3.01785300  |
| N | -4.80077500 | -5.73216800 | 3.56316700  |
| H | -4.77844600 | -6.59323200 | 3.01494700  |
| C | -4.59527100 | -4.57634700 | 2.85651600  |
| C | -2.16573200 | -5.09087200 | 5.30998300  |
| O | -0.94119500 | -5.34933400 | 5.39646100  |
| O | -4.69480700 | -4.55536700 | 1.60726800  |
| H | -2.73862700 | -7.02572900 | 5.08328800  |
| C | -3.80287300 | 13.11782300 | -0.94213400 |
| C | -3.09654700 | 13.23581000 | 0.26191700  |
| C | -3.41156200 | 12.32606600 | 1.27915000  |
| C | -4.36241700 | 11.32349900 | 1.11100700  |
| C | -5.00132100 | 11.22732900 | -0.11987300 |
| C | -4.75774600 | 12.12183200 | -1.16876700 |
| C | -3.14518700 | 10.65020200 | -5.21289600 |
| C | -3.82782400 | 11.47781600 | -4.31504300 |
| C | -4.85680300 | 11.03535900 | -3.47609200 |
| C | -5.22919000 | 9.68884300  | -3.59125900 |
| C | -4.60282800 | 8.83012000  | -4.49129000 |
| C | -3.55876200 | 9.31208500  | -5.27651500 |
| C | 1.48516100  | 12.69514600 | 0.59646900  |
| C | 0.22837500  | 13.17187900 | 0.96048000  |
| C | -0.63048200 | 13.78785000 | 0.04112000  |
| C | -0.17232400 | 13.90213900 | -1.27591800 |
| C | 1.06834400  | 13.41611900 | -1.70225600 |
| C | 1.88012900  | 12.81120900 | -0.73392900 |
| C | 1.85007400  | 11.17829800 | -4.10902000 |
| C | 1.05449500  | 12.32509100 | -3.99173000 |
| C | -0.18286700 | 12.31374500 | -4.64826800 |
| C | -0.65494200 | 11.20754600 | -5.36161700 |
| C | 0.17660700  | 10.08234900 | -5.41008900 |
| C | 1.43372100  | 10.05438000 | -4.81686900 |
| C | -2.01281000 | 14.29078400 | 0.43707100  |
| C | -5.50533800 | 11.99919900 | -2.49076500 |
| C | -2.00940400 | 11.21150600 | -6.05900800 |
| C | 1.49338800  | 13.52317700 | -3.16113900 |
| O | -2.79190400 | 12.48948700 | 2.52484100  |
| O | -5.98232000 | 10.25675100 | -0.33634700 |
| O | -6.27786300 | 9.18519800  | -2.80110500 |
| O | -2.92872100 | 8.43203100  | -6.17299400 |
| O | -0.17660700 | 13.10825600 | 2.30101000  |

|   |             |             |             |
|---|-------------|-------------|-------------|
| O | 3.15725800  | 12.38284700 | -1.11911700 |
| O | 3.13308500  | 11.20592200 | -3.54714500 |
| O | -0.28226500 | 8.98893400  | -6.14917700 |
| C | 3.95269100  | 8.48043700  | -1.51296200 |
| C | 3.96842100  | 9.09194600  | -0.26699400 |
| N | 3.69669800  | 10.38443400 | -0.07318700 |
| C | 3.40691600  | 11.04509700 | -1.18290600 |
| C | 3.39377000  | 10.42077600 | -2.46597800 |
| N | 3.66735900  | 9.13600200  | -2.64099000 |
| N | 0.45937700  | 11.08887300 | 3.24690000  |
| C | 0.01648700  | 9.94682800  | 3.77744300  |
| C | -1.32774400 | 9.61769900  | 3.88385700  |
| N | -2.30877400 | 10.42366400 | 3.46928200  |
| C | -1.88590800 | 11.56216200 | 2.93892600  |
| C | -0.50253400 | 11.89404200 | 2.82479100  |
| N | -5.04728800 | 8.29513200  | 0.48648900  |
| C | -5.60700200 | 8.96269500  | -0.50944400 |
| C | -5.87319000 | 8.37086400  | -1.77867600 |
| N | -5.71588100 | 7.07630900  | -2.00530000 |
| C | -5.21587700 | 6.39714800  | -0.96873200 |
| C | -4.83871800 | 7.00444000  | 0.22097800  |
| N | 0.16966700  | 7.15230600  | -4.80039700 |
| C | -0.69919800 | 7.87857700  | -5.48526000 |
| C | -2.07835200 | 7.53409400  | -5.58689900 |
| N | -2.56302100 | 6.39593200  | -5.11529600 |
| C | -1.66223500 | 5.63866000  | -4.48246000 |
| C | -0.34629900 | 6.03452800  | -4.28693300 |
| C | 4.29185000  | 7.01793900  | -1.33020800 |
| C | 4.31872000  | 8.05835000  | 0.76418800  |
| C | 0.82800000  | 8.81239100  | 4.33280900  |
| C | -1.43372100 | 8.24636800  | 4.51265100  |
| C | -4.90258400 | 4.92298600  | -0.86937300 |
| C | -4.18034400 | 5.97184700  | 1.09199500  |
| C | -1.85636500 | 4.29445600  | -3.82062500 |
| C | 0.33213500  | 5.01034300  | -3.42060200 |
| O | -5.12678200 | 4.03618800  | -1.65835100 |
| O | -3.64714300 | 6.12630500  | 2.17703300  |
| O | -2.41638800 | 7.59688700  | 4.78448200  |
| N | -0.10150200 | 7.86446000  | 4.73282100  |
| O | 2.03985500  | 8.72257100  | 4.42402600  |
| O | 4.38983900  | 6.14116200  | -2.15582500 |
| O | 4.43769300  | 8.20264300  | 1.96861900  |
| O | -2.83607600 | 3.58692000  | -3.79726600 |
| O | 1.46172600  | 5.03454100  | -2.96473300 |
| H | -3.59538100 | 13.83193000 | -1.73635900 |
| H | -4.58943500 | 10.63264900 | 1.91318400  |
| H | -3.53295400 | 12.52354000 | -4.25671600 |
| H | -4.91274000 | 7.79428900  | -4.56750500 |
| H | 2.14064300  | 12.24312000 | 1.33148900  |
| H | -0.81597900 | 14.38734000 | -2.00655800 |
| H | -0.80514900 | 13.20475300 | -4.59655700 |
| H | 2.06744300  | 9.17974900  | -4.89330600 |
| H | -1.99432800 | 14.62859700 | 1.47513800  |
| H | -2.26153100 | 15.15476900 | -0.18846300 |

|   |             |              |             |
|---|-------------|--------------|-------------|
| H | -5.54910300 | 12.98981300  | -2.95610800 |
| H | -6.53203900 | 11.68186500  | -2.29651800 |
| H | -2.25770300 | 12.24507100  | -6.32372800 |
| H | -1.93735300 | 10.64284700  | -6.98847600 |
| H | 2.57833000  | 13.63087600  | -3.21790900 |
| H | 1.04712300  | 14.42770400  | -3.58806100 |
| H | 0.19195000  | 6.93427500   | 5.08331400  |
| N | 4.48489000  | 6.88001900   | 0.05370300  |
| H | 4.66065900  | 5.97924600   | 0.53510400  |
| N | -4.27948200 | 4.78781400   | 0.38100200  |
| H | -3.95404200 | 3.89042100   | 0.78788700  |
| N | -0.62045400 | 4.02573200   | -3.21567800 |
| H | -0.38718500 | 3.14922600   | -2.70584100 |
| C | 0.18286700  | -12.31374500 | -4.64826800 |
| C | 0.65494200  | -11.20754600 | -5.36161700 |
| C | -0.17660700 | -10.08234900 | -5.41008900 |
| C | -1.43372100 | -10.05438000 | -4.81686900 |
| C | -1.85007400 | -11.17829800 | -4.10902000 |
| C | -1.05449500 | -12.32509100 | -3.99173000 |
| C | 0.63048200  | -13.78785000 | 0.04112000  |
| C | 0.17232400  | -13.90213900 | -1.27591800 |
| C | -1.06834400 | -13.41611900 | -1.70225600 |
| C | -1.88012900 | -12.81120900 | -0.73392900 |
| C | -1.48516100 | -12.69514600 | 0.59646900  |
| C | -0.22837500 | -13.17187900 | 0.96048000  |
| C | 4.60282800  | -8.83012000  | -4.49129000 |
| C | 3.55876200  | -9.31208500  | -5.27651500 |
| C | 3.14518700  | -10.65020200 | -5.21289600 |
| C | 3.82782400  | -11.47781600 | -4.31504300 |
| C | 4.85680300  | -11.03535900 | -3.47609200 |
| C | 5.22919000  | -9.68884300  | -3.59125900 |
| C | 5.00132100  | -11.22732900 | -0.11987300 |
| C | 4.75774600  | -12.12183200 | -1.16876700 |
| C | 3.80287300  | -13.11782300 | -0.94213400 |
| C | 3.09654700  | -13.23581000 | 0.26191700  |
| C | 3.41156200  | -12.32606600 | 1.27915000  |
| C | 4.36241700  | -11.32349900 | 1.11100700  |
| C | 2.00940400  | -11.21150600 | -6.05900800 |
| C | -1.49338800 | -13.52317700 | -3.16113900 |
| C | 2.01281000  | -14.29078400 | 0.43707100  |
| C | 5.50533800  | -11.99919900 | -2.49076500 |
| O | 0.28226500  | -8.98893400  | -6.14917700 |
| O | -3.13308500 | -11.20592200 | -3.54714500 |
| O | -3.15725800 | -12.38284700 | -1.11911700 |
| O | 0.17660700  | -13.10825600 | 2.30101000  |
| O | 2.92872100  | -8.43203100  | -6.17299400 |
| O | 6.27786300  | -9.18519800  | -2.80110500 |
| O | 5.98232000  | -10.25675100 | -0.33634700 |
| O | 2.79190400  | -12.48948700 | 2.52484100  |
| C | 4.83871800  | -7.00444000  | 0.22097800  |
| C | 5.21587700  | -6.39714800  | -0.96873200 |
| N | 5.71588100  | -7.07630900  | -2.00530000 |
| C | 5.87319000  | -8.37086400  | -1.77867600 |
| C | 5.60700200  | -8.96269500  | -0.50944400 |

|   |             |              |             |
|---|-------------|--------------|-------------|
| N | 5.04728800  | -8.29513200  | 0.48648900  |
| N | 2.56302100  | -6.39593200  | -5.11529600 |
| C | 1.66223500  | -5.63866000  | -4.48246000 |
| C | 0.34629900  | -6.03452800  | -4.28693300 |
| N | -0.16966700 | -7.15230600  | -4.80039700 |
| C | 0.69919800  | -7.87857700  | -5.48526000 |
| C | 2.07835200  | -7.53409400  | -5.58689900 |
| N | -3.66735900 | -9.13600200  | -2.64099000 |
| C | -3.39377000 | -10.42077600 | -2.46597800 |
| C | -3.40691600 | -11.04509700 | -1.18290600 |
| N | -3.69669800 | -10.38443400 | -0.07318700 |
| C | -3.96842100 | -9.09194600  | -0.26699400 |
| C | -3.95269100 | -8.48043700  | -1.51296200 |
| N | 2.30877400  | -10.42366400 | 3.46928200  |
| C | 1.88590800  | -11.56216200 | 2.93892600  |
| C | 0.50253400  | -11.89404200 | 2.82479100  |
| N | -0.45937700 | -11.08887300 | 3.24690000  |
| C | -0.01648700 | -9.94682800  | 3.77744300  |
| C | 1.32774400  | -9.61769900  | 3.88385700  |
| C | 4.18034400  | -5.97184700  | 1.09199500  |
| C | 4.90258400  | -4.92298600  | -0.86937300 |
| C | 1.85636500  | -4.29445600  | -3.82062500 |
| C | -0.33213500 | -5.01034300  | -3.42060200 |
| C | -4.31872000 | -8.05835000  | 0.76418800  |
| C | -4.29185000 | -7.01793900  | -1.33020800 |
| C | -0.82800000 | -8.81239100  | 4.33280900  |
| C | 1.43372100  | -8.24636800  | 4.51265100  |
| O | -4.43769300 | -8.20264300  | 1.96861900  |
| O | -4.38983900 | -6.14116200  | -2.15582500 |
| O | -1.46172600 | -5.03454100  | -2.96473300 |
| N | 0.62045400  | -4.02573200  | -3.21567800 |
| O | 2.83607600  | -3.58692000  | -3.79726600 |
| O | 3.64714300  | -6.12630500  | 2.17703300  |
| O | 5.12678200  | -4.03618800  | -1.65835100 |
| O | -2.03985500 | -8.72257100  | 4.42402600  |
| O | 2.41638800  | -7.59688700  | 4.78448200  |
| H | 0.80514900  | -13.20475300 | -4.59655700 |
| H | -2.06744300 | -9.17974900  | -4.89330600 |
| H | 0.81597900  | -14.38734000 | -2.00655800 |
| H | -2.14064300 | -12.24312000 | 1.33148900  |
| H | 4.91274000  | -7.79428900  | -4.56750500 |
| H | 3.53295400  | -12.52354000 | -4.25671600 |
| H | 3.59538100  | -13.83193000 | -1.73635900 |
| H | 4.58943500  | -10.63264900 | 1.91318400  |
| H | 1.93735300  | -10.64284700 | -6.98847600 |
| H | 2.25770300  | -12.24507100 | -6.32372800 |
| H | -1.04712300 | -14.42770400 | -3.58806100 |
| H | -2.57833000 | -13.63087600 | -3.21790900 |
| H | 2.26153100  | -15.15476900 | -0.18846300 |
| H | 1.99432800  | -14.62859700 | 1.47513800  |
| H | 6.53203900  | -11.68186500 | -2.29651800 |
| H | 5.54910300  | -12.98981300 | -2.95610800 |
| H | 0.38718500  | -3.14922600  | -2.70584100 |
| N | 4.27948200  | -4.78781400  | 0.38100200  |

|   |             |             |            |
|---|-------------|-------------|------------|
| H | 3.95404200  | -3.89042100 | 0.78788700 |
| N | -4.48489000 | -6.88001900 | 0.05370300 |
| H | -4.66065900 | -5.97924600 | 0.53510400 |
| N | 0.10150200  | -7.86446000 | 4.73282100 |
| H | -0.19195000 | -6.93427500 | 5.08331400 |

1 2 1.0  
2 3 1.0 4 1.0 5 1.0  
3 6 1.0 9 1.0 11 1.0  
4 7 1.0 8 1.0 13 1.0  
5  
6  
7  
8 16 1.5 19 1.0  
9 10 1.0 16 1.5  
10  
11 12 1.0 15 1.5  
12  
13 14 1.0 15 1.5  
14  
15 18 2.0  
16 17 2.0  
17  
18  
19  
20 21 1.0  
21 22 1.0 23 1.0 24 1.0  
22 25 1.0 28 1.0 30 1.0  
23 26 1.0 27 1.0 32 1.0  
24  
25  
26  
27 35 1.5 38 1.0  
28 29 1.0 35 1.5  
29  
30 31 1.0 34 1.5  
31  
32 33 1.0 34 1.5  
33  
34 37 2.0  
35 36 2.0  
36  
37  
38  
39 40 1.0  
40 41 1.0 42 1.0 43 1.0  
41 44 1.0 47 1.0 49 1.0  
42 45 1.0 46 1.0 51 1.0  
43  
44  
45  
46 54 1.5 57 1.0  
47 48 1.0 54 1.5  
48

49 50 1.0 53 1.5  
50  
51 52 1.0 53 1.5  
52  
53 56 2.0  
54 55 2.0  
55  
56  
57  
58 59 1.0  
59 60 1.0 61 1.0 62 1.0  
60 63 1.0 66 1.0 68 1.0  
61 64 1.0 65 1.0 70 1.0  
62  
63  
64  
65 73 1.5 76 1.0  
66 67 1.0 73 1.5  
67  
68 69 1.0 72 1.5  
69  
70 71 1.0 72 1.5  
71  
72 75 2.0  
73 74 2.0  
74  
75  
76  
77 78 1.0  
78 79 1.0 80 1.0 81 1.0  
79 82 1.0 85 1.0 87 1.0  
80 83 1.0 84 1.0 89 1.0  
81  
82  
83  
84 92 1.5 95 1.0  
85 86 1.0 92 1.5  
86  
87 88 1.0 91 1.5  
88  
89 90 1.0 91 1.5  
90  
91 94 2.0  
92 93 2.0  
93  
94  
95  
96 97 1.0  
97 98 1.0 99 1.0 100 1.0  
98 101 1.0 104 1.0 106 1.0  
99 102 1.0 103 1.0 108 1.0  
100  
101  
102

103 111 1.5 114 1.0  
104 105 1.0 111 1.5  
105  
106 107 1.0 110 1.5  
107  
108 109 1.0 110 1.5  
109  
110 113 2.0  
111 112 2.0  
112  
113  
114  
115 116 1.5 120 1.5 192 1.0  
116 117 1.5 139 1.0  
117 118 1.5 143 1.0  
118 119 1.5 193 1.0  
119 120 1.5 144 1.0  
120 140 1.0  
121 122 1.5 126 1.5 141 1.0  
122 123 1.5 194 1.0  
123 124 1.5 140 1.0  
124 125 1.5 145 1.0  
125 126 1.5 195 1.0  
126 146 1.0  
127 128 1.5 132 1.5 196 1.0  
128 129 1.5 147 1.0  
129 130 1.5 139 1.0  
130 131 1.5 197 1.0  
131 132 1.5 142 1.0  
132 148 1.0  
133 134 1.5 138 1.5 149 1.0  
134 135 1.5 142 1.0  
135 136 1.5 198 1.0  
136 137 1.5 141 1.0  
137 138 1.5 150 1.0  
138 199 1.0  
139 200 1.0 201 1.0  
140 202 1.0 203 1.0  
141 204 1.0 205 1.0  
142 206 1.0 207 1.0  
143 161 1.0  
144 164 1.0  
145 165 1.0  
146 171 1.0  
147 162 1.0  
148 154 1.0  
149 155 1.0  
150 170 1.0  
151 152 1.5 156 1.5 175 1.0  
152 153 1.5 176 1.0  
153 154 1.5  
154 155 1.5  
155 156 1.5  
156



157 158 1.5 162 1.5  
158 159 1.5 177 1.0  
159 160 1.5 178 1.0  
160 161 1.5  
161 162 1.5  
162  
163 164 1.5 168 1.5  
164 165 1.5  
165 166 1.5  
166 167 1.5  
167 168 1.5 179 1.0  
168 180 1.0  
169 170 1.5 174 1.5  
170 171 1.5  
171 172 1.5  
172 173 1.5  
173 174 1.5 181 1.0  
174 182 1.0  
175 188 2.0 209 1.0  
176 189 2.0 209 1.0  
177 186 1.0 187 2.0  
178 185 2.0 186 1.0  
179 183 2.0 211 1.0  
180 184 2.0 211 1.0  
181 190 2.0 213 1.0  
182 191 2.0 213 1.0  
183  
184  
185  
186 208 1.0  
187  
188  
189  
190  
191  
192  
193  
194  
195  
196  
197  
198  
199  
200  
201  
202  
203  
204  
205  
206  
207  
208  
209 210 1.0  
210

211 212 1.0  
212  
213 214 1.0  
214  
215 216 1.5 220 1.5 292 1.0  
216 217 1.5 239 1.0  
217 218 1.5 243 1.0  
218 219 1.5 293 1.0  
219 220 1.5 244 1.0  
220 240 1.0  
221 222 1.5 226 1.5 241 1.0  
222 223 1.5 294 1.0  
223 224 1.5 240 1.0  
224 225 1.5 245 1.0  
225 226 1.5 295 1.0  
226 246 1.0  
227 228 1.5 232 1.5 296 1.0  
228 229 1.5 247 1.0  
229 230 1.5 239 1.0  
230 231 1.5 297 1.0  
231 232 1.5 242 1.0  
232 248 1.0  
233 234 1.5 238 1.5 249 1.0  
234 235 1.5 242 1.0  
235 236 1.5 298 1.0  
236 237 1.5 241 1.0  
237 238 1.5 250 1.0  
238 299 1.0  
239 300 1.0 301 1.0  
240 302 1.0 303 1.0  
241 304 1.0 305 1.0  
242 306 1.0 307 1.0  
243 261 1.0  
244 264 1.0  
245 265 1.0  
246 271 1.0  
247 262 1.0  
248 254 1.0  
249 255 1.0  
250 270 1.0  
251 252 1.5 256 1.5 275 1.0  
252 253 1.5 276 1.0  
253 254 1.5  
254 255 1.5  
255 256 1.5  
256  
257 258 1.5 262 1.5  
258 259 1.5 277 1.0  
259 260 1.5 278 1.0  
260 261 1.5  
261 262 1.5  
262  
263 264 1.5 268 1.5  
264 265 1.5

265 266 1.5  
266 267 1.5  
267 268 1.5 279 1.0  
268 280 1.0  
269 270 1.5 274 1.5  
270 271 1.5  
271 272 1.5  
272 273 1.5  
273 274 1.5 281 1.0  
274 282 1.0  
275 288 2.0 309 1.0  
276 289 2.0 309 1.0  
277 286 1.0 287 2.0  
278 285 2.0 286 1.0  
279 283 2.0 311 1.0  
280 284 2.0 311 1.0  
281 290 2.0 313 1.0  
282 291 2.0 313 1.0  
283  
284  
285  
286 308 1.0  
287  
288  
289  
290  
291  
292  
293  
294  
295  
296  
297  
298  
299  
300  
301  
302  
303  
304  
305  
306  
307  
308  
309 310 1.0  
310  
311 312 1.0  
312  
313 314 1.0  
314
